# Supplementary material for: Effect of lysine side chain length on histone lysine acetyltransferase catalysis
Source: PubMed Central journal article supplement (PMC7400623; doi:10.1038/s41598-020-69510-0), 2020-08-03
Supplement: 41598_2020_69510_MOESM1_ESM.pdf [file 41598_2020_69510_MOESM1_ESM.pdf]

# Supplementary Information

## Effect of Lysine Side Chain Length on Histone Lysine Acetyltransferase Catalysis

Giordano Proietti<sup>1,2</sup>, Yali Wang<sup>2,3</sup>, Giorgio Rainone<sup>1</sup> & Jasmin Mecinović<sup>1,2\*</sup>

<sup>1</sup> Department of Physics, Chemistry and Pharmacy, University of Southern Denmark, Campusvej 55, 5230 Odense, Denmark.

<sup>2</sup> Institute for Molecules and Materials, Radboud University, Heyendaalseweg 135, 6525 AJ Nijmegen, The Netherlands.

<sup>3</sup> Department of Blood Transfusion, China-Japan Union Hospital, Jilin University, 126 Xiantai Street, Changchun, 130033, P. R. China.

\*e-mail: mecinovic@sdu.dk

## Table of Contents

|    |                                               |    |
|----|-----------------------------------------------|----|
| 1  | General experimental                          | 3  |
| 2  | Synthetic protocols                           | 4  |
| 3  | List of peptides                              | 9  |
| 4  | ESI-MS analysis of peptides                   | 10 |
| 5  | Analytical HPLC of peptides                   | 11 |
| 6  | Time course plot of KAT-catalyzed acetylation | 23 |
| 7  | MALDI-TOF MS supporting figures               | 24 |
| 8  | Kinetics plots                                | 57 |
| 9  | NMR spectra                                   | 60 |
| 10 | References                                    | 68 |

## 1. General Experimental

All commercially available reagents were purchased and used without further purification. Unless otherwise noted all the reagents were purchased from Sigma-Aldrich. Fmoc-L-hLys(Boc)-OH was purchased from Iris Biotech. Wang resin (100-200 mesh), Fmoc-Orn(Boc)-OH, Fmoc-Dab(Boc)-OH, Fmoc-D-Lys(Boc)-OH were purchased from Bachem AG. Di-tert-butyliminodicarboxylate was purchased from Fluorochem. Reactions were magnetically stirred and monitoring by thin layer chromatography (TLC) was performed on glass backed silica sheets (Merck Silica Gel 60 F254) and the plates were visualized by UV fluorescence (254 nm) and/or spraying with potassium permanganate (KMnO<sub>4</sub>) or ninhydrin. Flash column chromatography was performed on a Biotage Isolera ONE system employing Silicycle SiliaSEP prepacked columns with the designated solvent systems. <sup>1</sup>H NMR and <sup>13</sup>C NMR spectra were obtained using a Bruker Avance III 400 MHz. <sup>1</sup>H NMR chemical shift values are reported as  $\delta$  in units of parts per million (ppm) relative to the internal standard tetramethylsilane (TMS,  $\delta$  = 0 ppm). <sup>13</sup>C NMR shifts are reported as  $\delta$  in units of parts per million (ppm) and the spectra were internally referenced to the residual solvent signal (CHCl<sub>3</sub>  $\delta$  = 77.0 ppm). Coupling constant are reported as *J* values in Hertz (HZ). The following abbreviations were used to explain multiplicities: s = singlet, d = doublet, t = triplet, q = quartet, m = multiplet, br = broad. High-resolution mass spectra were obtained with a JEOL AccuTOF CS JMS-T100CS mass spectrometer. LC-MS analysis for the final side chain extended lysine analogs and peptides was carried out on a Thermo Finnigan LCQ-Fleet ESI-ion trap (ThermoFischer, Breda, the Netherlands) bearing a Phenomenex Gemini-NX C18 3  $\mu$ M 50 x 2.0 mm (Phenomenex, Utrecht, The Netherlands). Lyophilization of peptides was performed with an ilShin Freeze Dryer (ilShin, Ede, The Netherlands).

## 2. Synthetic protocols

### General procedures:

#### General procedure A: preparation of diBoc-protected amino alkenes **1-3**

To a stirring suspension of di-tert-butyliminodicarboxylate (1.30 g, 6 mmol, 1.0 eq), lithium iodide (0.04 g, 0.3 mmol, 0.05 eq) and cesium carbonate (3.91 g, 12 mmol, 2.0 eq) in 2-butanone (30 mL), bromoalkene (9 mmol, 1.5 eq) were added dropwise and the reaction was left stirring under reflux for 16 hours. Subsequently, the reaction mixture was brought to room temperature, quenched with brine (60 mL) and extracted with Et<sub>2</sub>O (3 x 30 mL). The organic layers were combined, dried over NaSO<sub>4</sub>, and concentrated *in vacuo*. The crude mixture was purified by flash chromatography.

#### General procedure B: preparation of unsaturated Fmoc-Lys(Boc)<sub>2</sub>-OH analogs **4-6**

Fmoc-Allyl glycine (0.1 g, 0.3 mmol, 1.0 eq) and its cross-metathesis partner diBoc-protected amino alkenes **1-3** (0.9 mmol, 3.0 eq) were dissolved in dry CH<sub>2</sub>Cl<sub>2</sub> (30 mL) in a flamed dry flask under inert atmosphere. Subsequently, Hoveyda-Grubbs II generation catalyst (10% mol, 18.7 mg) was added and the dark green solution was left stirring under reflux for 16 h. The reaction mixture was then concentrated *in vacuo*. The crude mixture was purified by flash chromatography to afford a mixture of cis and trans isomers. Only partial characterization (<sup>1</sup>H NMR, HRMS) was possible for this analogs.

#### General procedure B: preparation of Fmoc-Lys(Boc)<sub>2</sub>-OH analogs **7-9**

A solution of unsaturated analogs **4-6** (0.12 mmol, 1 eq) in EtOH (5 mL) was added to a stirring suspension of Pd/C (10 wt. %) in EtOH (15 mL) being kept under N<sub>2</sub> flow. The N<sub>2</sub> stream was swiftly switched to H<sub>2</sub> (1 atm) and the reaction was left stirring at RT. The progress of the reaction was monitored by ESI-MS until full reduction of the starting material. Subsequently, the reaction mixture was filtered through Celite and concentrated *in vacuo* to yield the final compounds without further purification.

### Di-*tert*-butyl N-4-pentenyliminodicarboxylate (1).

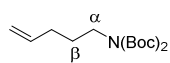

Synthesized via the general procedure A starting from 5-bromopent-1-ene (1.06 mL, 9 mmol). Purified by flash chromatography (0-10% EtOAc in *n*-heptane, 8 cv) to yield **1** as a colourless oil (1.59 g, 93%). to yield **3** as a Colourless oil (1.59 g, 93%).  $R_f = 0.65$  (EtOAc/*n*-heptane 1:3).  $^1\text{H NMR}$  ( $\text{CDCl}_3$ , 400 MHz):  $\delta$  5.81 (ddt,  $J = 16.9, 10.2, 6.6$  Hz, 1H,  $\text{CH}_2=\text{CH}$ ), 5.09 – 4.92 (m, 2H,  $\text{CH}_2=\text{CH}$ ), 3.57 (t,  $J=7.5$  Hz 2H,  $\alpha\text{-CH}_2$ ), 2.06 (q,  $J = 7.2$  Hz, 2H,  $\text{CH-CH}_2$ ), 1.67 (p,  $J = 7.5$  Hz, 2H,  $\beta\text{-CH}_2$ ), 1.51 (s, 18H, 6 x  $\text{CH}_3$  Boc).  $^{13}\text{C NMR}$  (101 MHz,  $\text{CDCl}_3$ )  $\delta$  152.67, 137.89, 114.90, 82.09, 46.05, 31.01, 28.10. ESI-MS  $[\text{M}+\text{Na}]^+$ : 308.0 m/z. Spectroscopic data in line with previous characterization.<sup>1</sup>

### Di-*tert*-butyl N-4-hexenyliminodicarboxylate (2).

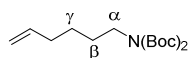

Synthesized via the general procedure A starting from 6-bromohex-1-ene (1.2 mL, 9 mmol). Purified by flash chromatography (0-5% EtOAc in *n*-heptane) to yield **2** as a colourless oil (1.26 g, 70%).  $R_f = 0.74$  (EtOAc/*n*-heptane 1:3).  $^1\text{H NMR}$  ( $\text{CDCl}_3$ , 400 MHz):  $\delta$  5.80 (ddt,  $J = 16.9, 10.2, 6.7$  Hz, 1H,  $\text{CH}_2=\text{CH}$ ), 5.04 – 4.93 (m, 2H), 4.95 (ddt,  $J = 10.2, 2.2, 1.2$  Hz, 1H,  $\text{CH}_2=\text{CH}$ ), 3.55 (t,  $J=7.5$  Hz, 2H,  $\alpha\text{-CH}_2$ ), 2.05 (q,  $J = 7.1$  Hz, 2H,  $\text{CH-CH}_2$ ), 1.58 (p, 2H,  $J = 7.5$  Hz  $\beta\text{-CH}_2$ ), 1.51 (s, 18H, 6 x  $\text{CH}_3$  Boc), 1.45 – 1.33 (m, 2H,  $\gamma\text{-CH}_2$ ).  $^{13}\text{C NMR}$  (101 MHz,  $\text{CDCl}_3$ )  $\delta$  152.67, 137.89, 114.90, 82.09, 46.05, 31.01, 28.13, 28.10. ESI-MS  $[\text{M}+\text{Na}]^+$ : 321.9 m/z. Spectroscopic data in line with previous characterization.<sup>2</sup>

### Di-*tert*-butyl N-4-heptenyliminodicarboxylate (3).

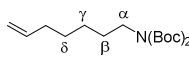

Synthesized via the general procedure A starting from 7-bromohept-1-ene (1.37 mL, 9 mmol). Purified by flash chromatography (0-5% EtOAc in *n*-heptane, 10 cv) to yield **3** as a colourless oil (1.58 g, 84%).  $R_f = 0.67$  (EtOAc/*n*-heptane 1:3).  $^1\text{H NMR}$  ( $\text{CDCl}_3$ , 400 MHz):  $\delta$  5.79 (ddt,  $J = 16.9, 10.2, 6.6$  Hz, 1H,  $\text{CH}_2=\text{CH}$ ), 5.02-4.91 (m, 2H) 4.93 (ddt,  $J = 10.2, 2.3, 1.2$  Hz, 1H), 3.55 (t,  $J = 7.5$  Hz 2H,  $\alpha\text{-CH}_2$ ), 2.06 (q,  $J = 7.2$  Hz, 2H,  $\text{CH-CH}_2$ ), 1.56 (p, 2H,  $J = 7.5$  Hz  $\beta\text{-CH}_2$ ), 1.51 (s, 18H, 6 x  $\text{CH}_3$  Boc), 1.45 – 1.36 (m, 2H,  $\gamma\text{-CH}_2$ ), 1.35 – 1.25 (m, 2H,  $\delta\text{-CH}_2$ ).  $^{13}\text{C NMR}$  (101 MHz,  $\text{CDCl}_3$ )  $\delta$  152.72, 138.83, 114.38, 81.98, 46.42, 33.70, 28.90, 28.58, 28.10, 26.29. ESI-MS  $[\text{M}+\text{Na}]^+$ : 335.9 m/z.

**(S,E)-2-(((9H-fluoren-9-yl)methoxy)carbonyl)amino)-8-(bis(tert-butoxycarbonyl)amino)oct-4-enoic acid (4).**

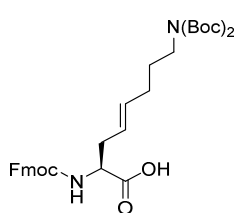

Synthesized via the general procedure B employing **1** (0.25 g, 0.9 mmol) as the cross-metathesis partner. Purified by flash chromatography (20-80% EtOAc/cyclohexane +0.1% AcOH, 8 cv) to afford **4** as a colourless oil mixture of cis and trans isomers (71 mg 40%).  $R_f = 0.33$  (EtOAc + 0.1% AcOH). ( $^1\text{H}$  NMR (400 MHz, Methanol- $d_4$ )  $\delta$  7.78 (d,  $J = 7.5$  Hz, 2H, Fmoc-H), 7.65 (dd,  $J = 7.5$ , 4.2 Hz, 2H, Fmoc-H), 7.38 (t,  $J = 7.4$  Hz, 2H, Fmoc-H), 7.29 (t,  $J = 7.2$  Hz, 2H, Fmoc-H), 5.64 – 5.37 (m, 2H, CH=CH), 4.36 – 4.28 (m, 2H), 4.25 – 4.16 (m, 2H), 3.53 (t,  $J = 7.4$  Hz, 2H, CH<sub>2</sub>-N(Boc)<sub>2</sub>), 2.65 – 2.36 (m, 2H,  $\beta$ -CH<sub>2</sub>), 2.00 (q,  $J = 7.1$  Hz, 2H,  $\epsilon$ -CH<sub>2</sub>), 1.61 (p,  $J = 7.4$  Hz, 2H,  $\zeta$ -CH<sub>2</sub>), 1.46 (s, 18H, 6 x CH<sub>3</sub> Boc). HRMS  $[\text{M}+\text{Na}]^+$  calculated 617.2834, found 617.2825.

**(S,E)-2-(((9H-fluoren-9-yl)methoxy)carbonyl)amino)-9-(bis(tert-butoxycarbonyl)amino)non-4-enoic acid (5).**

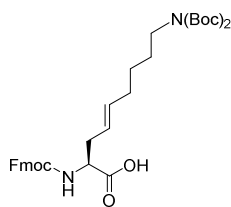

Synthesized via the general procedure B employing **2** (0.27 g, 0.9 mmol) as the cross-metathesis partner. Purified by flash chromatography (40-60% EtOAc + 1% AcOH in cyclohexane, 8 cv) to afford **5** as a brown oil mixture of cis and trans isomers (95 mg, 50%).  $R_f = 0.33$  (EtOAc + 0.1% AcOH). ( $^1\text{H}$  NMR (400 MHz, Methanol- $d_4$ )  $\delta$  7.79 (d,  $J = 7.5$  Hz, 2H, Fmoc-H), 7.67 (t,  $J = 7.4$  Hz, 2H, Fmoc-H), 7.38 (t,  $J = 7.4$  Hz, 2H, Fmoc-H), 7.30 (t,  $J = 7.5$  Hz, 2H), 5.64 – 5.37 (m, 2H, CH=CH), 4.36 – 4.28 (m, 2H), 4.24 – 4.17 (m, 2H), 3.58 – 3.47 (m, 2H), 2.65-2.36 (m, 2H), 2.00 (q,  $J = 7.1$  Hz 2H,  $\epsilon$ -CH<sub>2</sub>), 1.60 – 1.51 (m, 2H), 1.46 (s, 18H, 6 x CH<sub>3</sub> Boc), 1.40 – 1.26 (m, 2H). HRMS  $[\text{M}+\text{Na}]^+$  calculated 631.2995, found 631.2983.

**(S,E)-2-(((9H-fluoren-9-yl)methoxy)carbonyl)amino)-10-(bis(tert-butoxycarbonyl)amino)dec-4-enoic acid (6).**

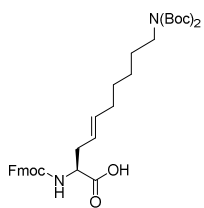

Synthesized via the general procedure B employing **3** (0.28 g, 0.9 mmol) as the cross-metathesis partner. purified by flash chromatography (40-60% EtOAc + 1% AcOH in cyclohexane, 2 cv) to afford **6** as a brown oil (76 mg, 41%).  $R_f = 0.33$  (in EtOAc + 0.1% AcOH).  $\delta$  7.78 (d,  $J = 7.5$  Hz, 2H), 7.65 (dd,  $J = 7.5, 4.2$  Hz, 2H), 7.38 (t,  $J = 7.4$  Hz, 2H), 7.29 (t,  $J = 7.2$  Hz, 2H), 5.74 – 5.32 (m, 2H), 4.36-4.28 (m, 2H), 4.25 – 4.16 (m, 2H), 3.55 – 3.49 (m, 2H), 2.66-2.32 (m, 2H), 2.11 – 2.96 (m, 2H), 1.63 – 1.51 (m, 2H), 1.46 (s, 18H), 1.44 – 1.22 (m, 4H). HRMS  $[M+Na]^+$  calculated 645.3151, found 645.3135

**(S)-2-(((9H-fluoren-9-yl)methoxy)carbonyl)amino)-8-(bis(tert-butoxycarbonyl)amino)octanoic acid (7).**

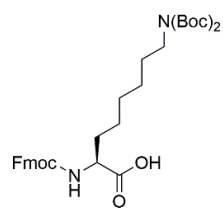

Synthesized via the general procedure C for reduction of **4** (71 mg, 0.12 mmol). Off-white solid (55 mg, 76%).  $R_f = 0.33$  (EtOAc + 0.1% AcOH). ( $^1H$  NMR (400 MHz, Methanol- $d_4$ )  $\delta$  7.76 (d,  $J = 7.6$  Hz, 2H, Fmoc-H), 7.65 (t,  $J = 7.4$  Hz, 2H, Fmoc-H), 7.36 (t,  $J = 7.5$  Hz, 2H, Fmoc-H), 7.27 (t,  $J = 7.5$  Hz, 2H, Fmoc-H), 4.32 (d,  $J = 7.0$  Hz, 2H, Fmoc-CH<sub>2</sub>), 4.25 (t,  $J = 7.1$  Hz, 1H, Fmoc-CH), 4.11 (dd,  $J = 9.3, 4.6$  Hz, 1H,  $\alpha$ -H), 3.53 (t,  $J = 7.4$  Hz, 2H, CH<sub>2</sub>-N(Boc)<sub>2</sub>), 1.95 – 1.80 (m, 1H,  $\beta$ -CH<sub>2</sub>), 1.75 – 1.65 (m, 1H,  $\beta$ -CH<sub>2</sub>), 1.54 (p,  $J = 7.2$  Hz, 2H,  $\zeta$ -CH<sub>2</sub>), 1.51 (s, 18H, 6 x CH<sub>3</sub> Boc), 1.46 – 1.28 (m, 6H,  $\gamma, \delta, \epsilon$ -CH<sub>2</sub>).  $^{13}C$  NMR (101 MHz, MeOD)  $\delta$  176.03, 158.70, 154.16, 145.37, 145.19, 142.60, 128.78, 128.15, 126.28, 120.91, 83.58, 67.93, 55.23, 48.44, 47.38, 32.59, 30.01, 29.83, 28.31, 27.60, 26.87. HRMS  $[M+Na]^+$  calculated 619.2995, found 619.2976

**(S)-2-((((9H-fluoren-9-yl)methoxy)carbonyl)amino)-9-(bis(tert-butoxycarbonyl)amino)nonanoic acid (8).**

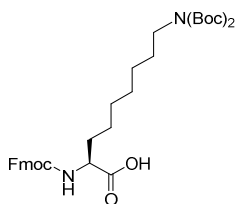

Synthesized via the general procedure C for reduction of **5** (95 mg, 0.15 mmol, 1 eq). Dark brown oil (79 mg, 88%).  $R_f = 0.35$  (in EtOAc + 0.1% AcOH).  $^1\text{H}$  NMR (400 MHz, Methanol- $d_4$ )  $\delta$  7.80 (d,  $J = 7.6$  Hz, 2H), 7.68 (t,  $J = 8.1$  Hz, 2H, Fmoc- $\underline{H}$ ), 7.39 (t,  $J = 7.5$  Hz, 2H, Fmoc- $\underline{H}$ ), 7.31 (t,  $J = 7.5$  Hz, 2H, Fmoc- $\underline{H}$ ), 4.01 – 4.32 (m, 2H, Fmoc- $\underline{CH_2}$ ), 4.23 (t,  $J = 7.1$  Hz, 1H, Fmoc- $\underline{CH}$ ), 4.16 (dd,  $J = 9.2, 4.7$  Hz, 1H,  $\alpha$ - $\underline{H}$ ), 3.55 (t,  $J = 7.4$  Hz, 2H,  $\underline{CH_2}$ -N(Boc) $_2$ ), 1.90 – 1.81 (m, 1H,  $\beta$ - $\underline{CH_2}$ ), 1.75 – 1.64 (m, 1H,  $\beta$ - $\underline{CH_2}$ ) 1.57 (p,  $J = 7.3$  Hz, 2H,  $\eta$ - $\underline{CH_2}$ ), 1.51 (s, 18H, 6 x  $\underline{CH_3}$  Boc), 1.46 – 1.26 (m, 8H,  $\gamma, \delta, \epsilon, \zeta$ - $\underline{CH_2}$ ).  $^{13}\text{C}$  NMR (101 MHz, MeOD)  $\delta$  176.23, 158.62, 154.11, 145.32, 145.15, 142.55, 128.75, 128.14, 128.12, 126.26, 120.89, 83.53, 67.91, 55.36, 48.40, 47.37, 32.71, 30.16, 30.09, 30.01, 28.31, 27.64, 26.80. HRMS  $[\text{M}+\text{Na}]^+$  calculated 633.3151, found 633.3134

**(S)-2-((((9H-fluoren-9-yl)methoxy)carbonyl)amino)-10-(bis(tert-butoxycarbonyl)amino)decanoic acid (9).**

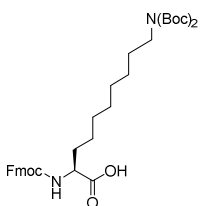

Synthesized via the general procedure C for reduction of **6** (76 mg, 0.12 mmol). White solid (60 mg, 80%).  $R_f = 0.33$  (in EtOAc + 0.1% AcOH).  $^1\text{H}$  NMR (400 MHz, Methanol- $d_4$ )  $\delta$  7.79 (d,  $J = 7.5$  Hz, 2H), 7.67 (t,  $J = 7.1$  Hz, 2H), 7.38 (t,  $J = 7.3$  Hz, 2H), 7.30 (t,  $J = 7.4$  Hz, 2H), 4.46 – 4.30 (m, 2H, Fmoc- $\underline{CH_2}$ ), 4.22 (t,  $J = 7.0$  Hz, 1H, ), 4.13 (dd,  $J = 9.2, 4.8$  Hz, 1H,  $\alpha$ - $\underline{H}$ ), 3.54 (t,  $J = 7.3$  Hz, 2H,  $\underline{CH_2}$ -N(Boc) $_2$ ), 1.89 – 1.76 (m, 1H,  $\beta$ - $\underline{CH_2}$ ), 1.73 – 1.62 (m, 1H,  $\beta$ - $\underline{CH_2}$ ), 1.59 – 1.52 (m, 2H,  $\theta$ - $\underline{CH_2}$ ), 1.49 (s, 18H, 6 x  $\underline{CH_3}$  Boc), 1.44 – 1.24 (m, 10H,  $\gamma, \delta, \epsilon, \zeta, \eta$ - $\underline{CH_2}$ ).  $^{13}\text{C}$  NMR (101 MHz, MeOD)  $^{13}\text{C}$  NMR (101 MHz, MeOD)  $\delta$  176.27, 158.65, 154.14, 145.35, 145.18, 128.76, 128.15, 126.27, 120.91, 83.55, 67.92, 55.42, 48.43, 47.40, 32.76, 30.42, 30.20, 30.06, 30.02, 28.31, 27.69, 26.86. HRMS  $[\text{M}+\text{Na}]^+$  calculated 647.3308, found 647.3289.



### 3. List of peptides

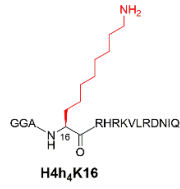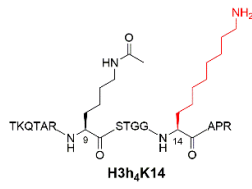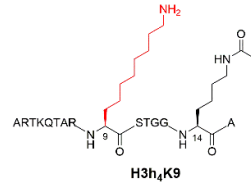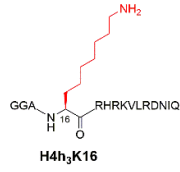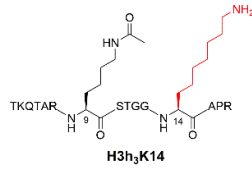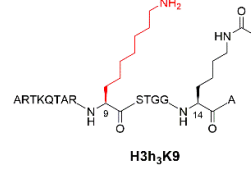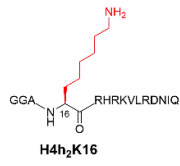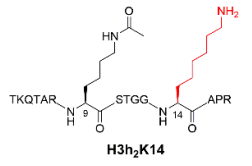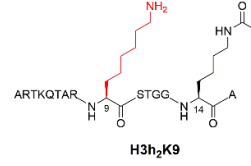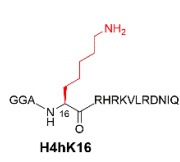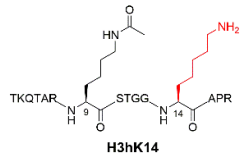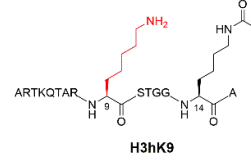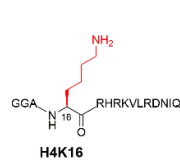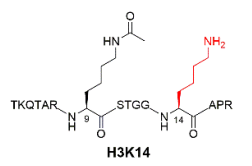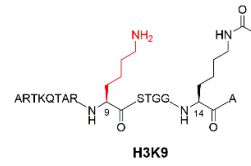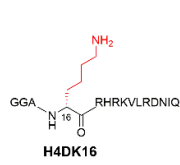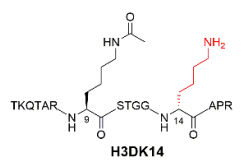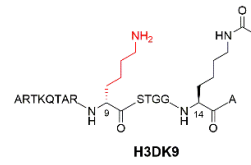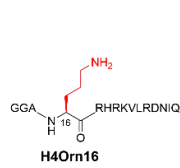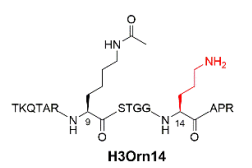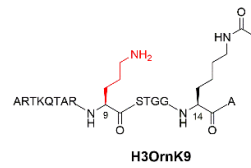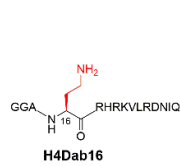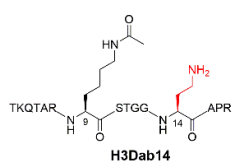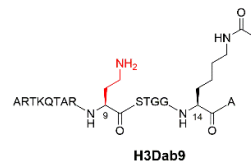

**4. Table S1. ESI-MS analysis of the peptides.**

| Entry | Peptide              | Sequence                                                                   | Formula                                                          | m/z calc. | [M+2H] <sup>2+</sup> found | [M+3H] <sup>3+</sup> found | [M+4H] <sup>4+</sup> found |
|-------|----------------------|----------------------------------------------------------------------------|------------------------------------------------------------------|-----------|----------------------------|----------------------------|----------------------------|
| 1     | H4Dab16              | GGADab <sup>16</sup> RHRKVLDRNIQ                                           | C <sub>71</sub> H <sub>126</sub> N <sub>30</sub> O <sub>20</sub> | 1718.9    | 860.5                      | 574.0                      | 430.8                      |
| 2     | H4Orn16              | GGAOrn <sup>16</sup> RHRKVLDRNIQ                                           | C <sub>72</sub> H <sub>128</sub> N <sub>30</sub> O <sub>20</sub> | 1732.9    | 867.5                      | 578.9                      | 434.3                      |
| 3     | H4DK16               | GGAD-K <sup>16</sup> RHRKVLDRNIQ                                           | C <sub>73</sub> H <sub>130</sub> N <sub>30</sub> O <sub>20</sub> | 1747.0    | 874.5                      | 583.6                      | 437.8                      |
| 4     | H4K16                | GGAK <sup>16</sup> RHRKVLDRNIQ                                             | C <sub>73</sub> H <sub>130</sub> N <sub>30</sub> O <sub>20</sub> | 1747.0    | 874.5                      | 583.6                      | 437.8                      |
| 5     | H4hK16               | GGAhK <sup>16</sup> RHRKVLDRNIQ                                            | C <sub>74</sub> H <sub>132</sub> N <sub>30</sub> O <sub>20</sub> | 1761.0    | 881.6                      | 588.3                      | 441.4                      |
| 6     | H4h <sub>2</sub> K16 | GGAh <sub>2</sub> K <sup>16</sup> RHRKVLDRNIQ                              | C <sub>75</sub> H <sub>134</sub> N <sub>30</sub> O <sub>20</sub> | 1775.0    | 888.5                      | 592.9                      | 444.8                      |
| 7     | H4h <sub>3</sub> K16 | GGAh <sub>3</sub> K <sup>16</sup> RHRKVLDRNIQ                              | C <sub>76</sub> H <sub>136</sub> N <sub>30</sub> O <sub>20</sub> | 1789.0    | 895.9                      | 597.6                      | 448.4                      |
| 8     | H4h <sub>4</sub> K16 | GGAh <sub>4</sub> K <sup>16</sup> RHRKVLDRNIQ                              | C <sub>77</sub> H <sub>138</sub> N <sub>30</sub> O <sub>20</sub> | 1803.1    | 902.9                      | 602.3                      | 451.9                      |
| 9     | H3Dab14              | TKQTARK <sup>Ac</sup> STGGDab <sup>14</sup> APR                            | C <sub>65</sub> H <sub>117</sub> N <sub>25</sub> O <sub>22</sub> | 1599.9    | 801.5                      | 534.3                      | 400.9                      |
| 10    | H3Orn14              | TKQTARK <sup>Ac</sup> STGGOrn <sup>14</sup> APR                            | C <sub>66</sub> H <sub>119</sub> N <sub>25</sub> O <sub>22</sub> | 1613.9    | 807.9                      | 538.9                      | 404.5                      |
| 11    | H3DK14               | TKQTARK <sup>Ac</sup> STGGD-K <sup>14</sup> APR                            | C <sub>67</sub> H <sub>121</sub> N <sub>25</sub> O <sub>22</sub> | 1627.9    | 814.9                      | 543.6                      | 407.9                      |
| 12    | H3K14                | TKQTARK <sup>Ac</sup> STGGK <sup>14</sup> APR                              | C <sub>67</sub> H <sub>121</sub> N <sub>25</sub> O <sub>22</sub> | 1627.9    | 814.9                      | 543.6                      | 407.9                      |
| 13    | H3hK14               | TKQTARK <sup>Ac</sup> STGGhK <sup>14</sup> APR                             | C <sub>68</sub> H <sub>123</sub> N <sub>25</sub> O <sub>22</sub> | 1641.9    | 822.0                      | 548.3                      | 411.5                      |
| 14    | H3h <sub>2</sub> K14 | TKQTARK <sup>Ac</sup> STGGh <sub>2</sub> K <sup>14</sup> APR               | C <sub>69</sub> H <sub>125</sub> N <sub>25</sub> O <sub>22</sub> | 1656.9    | 829.0                      | 553.0                      | 415.0                      |
| 15    | H3h <sub>3</sub> K14 | TKQTARK <sup>Ac</sup> STGGh <sub>3</sub> K <sup>14</sup> APR               | C <sub>70</sub> H <sub>127</sub> N <sub>25</sub> O <sub>22</sub> | 1669.9    | 836.0                      | 557.6                      | 418.5                      |
| 16    | H3h <sub>4</sub> K14 | TKQTARK <sup>Ac</sup> STGGh <sub>4</sub> K <sup>14</sup> APR               | C <sub>71</sub> H <sub>129</sub> N <sub>25</sub> O <sub>22</sub> | 1683.9    | 843.0                      | 562.3                      | 422.0                      |
| 17    | H3Dab9               | ARTKQTAR <sup>Ac</sup> Dab <sup>9</sup> STGGK <sup>Ac</sup> A              | C <sub>63</sub> H <sub>115</sub> N <sub>25</sub> O <sub>22</sub> | 1573.9    | 787.9                      | 525.6                      | 394.4                      |
| 18    | H3Orn9               | ARTKQTAR <sup>Ac</sup> Orn <sup>9</sup> STGGK <sup>Ac</sup> A              | C <sub>64</sub> H <sub>117</sub> N <sub>25</sub> O <sub>22</sub> | 1587.9    | 794.2                      | 530.3                      | 397.9                      |
| 19    | H3D-K9               | ARTKQTAR <sup>Ac</sup> D-K <sup>9</sup> STGGK <sup>Ac</sup> A              | C <sub>65</sub> H <sub>119</sub> N <sub>25</sub> O <sub>22</sub> | 1601.9    | 801.9                      | 534.9                      | 401.5                      |
| 20    | H3K9                 | ARTKQTAR <sup>Ac</sup> K <sup>9</sup> STGGK <sup>Ac</sup> A                | C <sub>65</sub> H <sub>119</sub> N <sub>25</sub> O <sub>22</sub> | 1601.9    | 801.9                      | 534.9                      | 401.5                      |
| 21    | H3hK9                | ARTKQTAR <sup>Ac</sup> hK <sup>9</sup> STGGK <sup>Ac</sup> A               | C <sub>66</sub> H <sub>121</sub> N <sub>25</sub> O <sub>22</sub> | 1615.9    | 808.9                      | 539.8                      | 404.9                      |
| 22    | H3h <sub>2</sub> K9  | ARTKQTAR <sup>Ac</sup> h <sub>2</sub> K <sup>9</sup> STGGK <sup>Ac</sup> A | C <sub>67</sub> H <sub>123</sub> N <sub>25</sub> O <sub>22</sub> | 1629.9    | 815.9                      | 544.4                      | 408.4                      |
| 23    | H3h <sub>3</sub> K9  | ARTKQTAR <sup>Ac</sup> h <sub>3</sub> K <sup>9</sup> STGGK <sup>Ac</sup> A | C <sub>68</sub> H <sub>125</sub> N <sub>25</sub> O <sub>22</sub> | 1643.9    | 822.8                      | 549.1                      | 411.9                      |
| 24    | H3h <sub>4</sub> K9  | ARTKQTAR <sup>Ac</sup> h <sub>4</sub> K <sup>9</sup> STGGK <sup>Ac</sup> A | C <sub>69</sub> H <sub>127</sub> N <sub>25</sub> O <sub>22</sub> | 1657.9    | 829.9                      | 553.8                      | 415.4                      |

## 5. Analytical HPLC of peptides

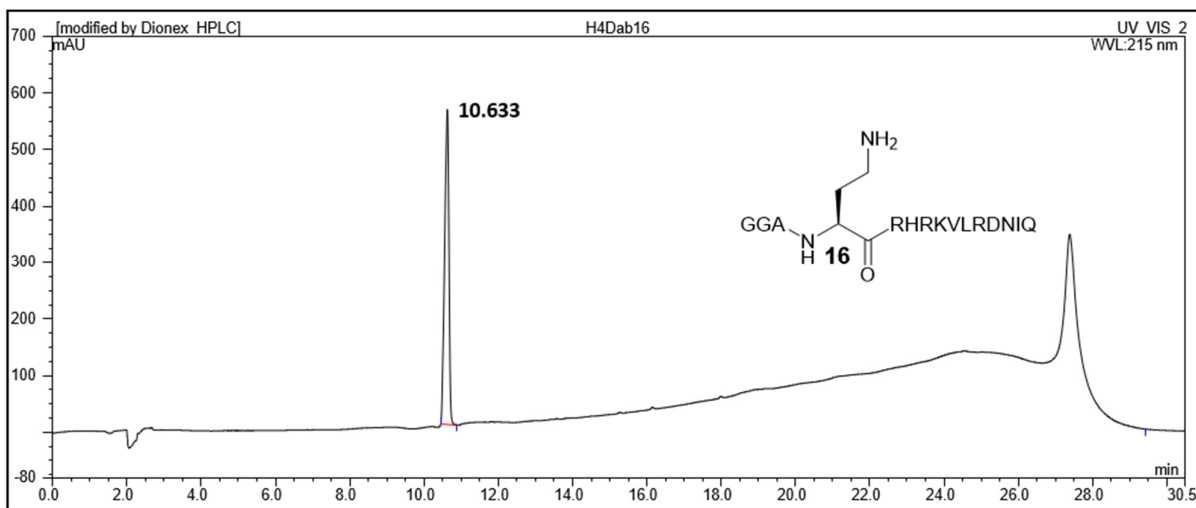

**Figure S1.** Analytical HPLC of the H4Dab16 peptide after RP-HPLC purification.

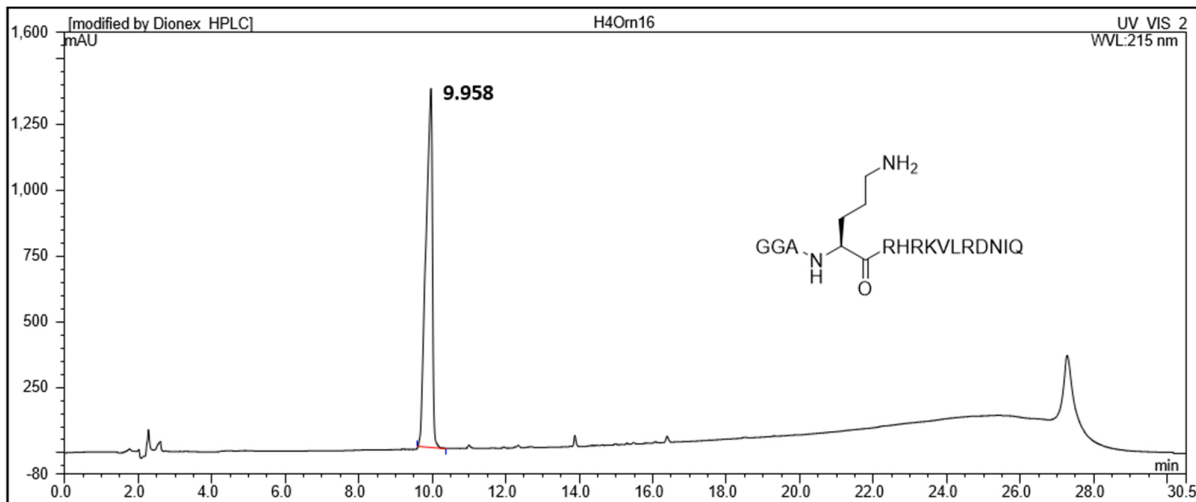

**Figure S2.** Analytical HPLC of the H4Orn16 peptide after RP-HPLC purification.

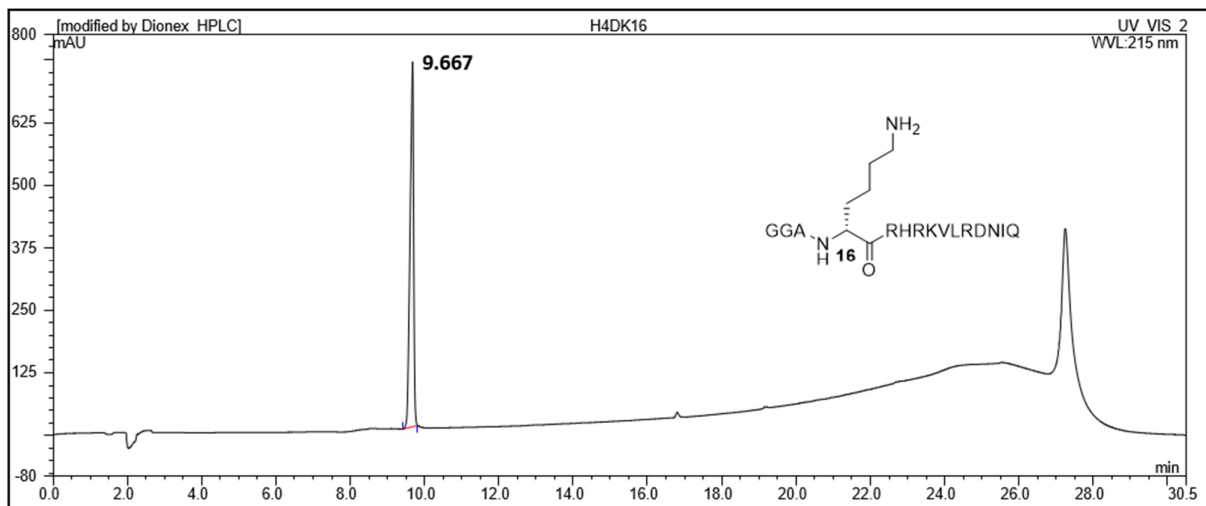

**Figure S3.** Analytical HPLC of the D-H4K16 peptide after RP-HPLC purification.

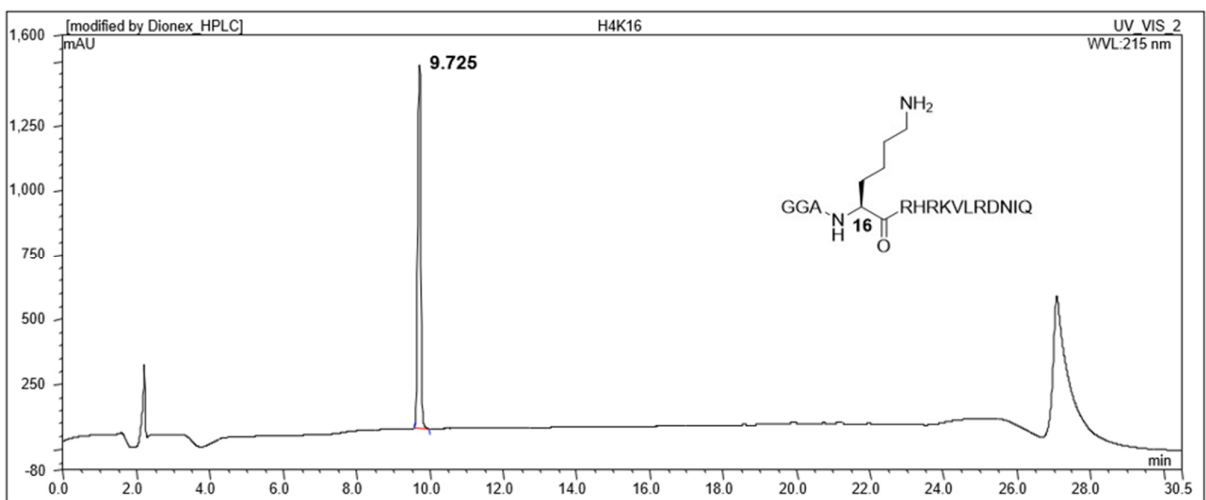

**Figure S4.** Analytical HPLC of the H4K16 peptide after RP-HPLC purification.

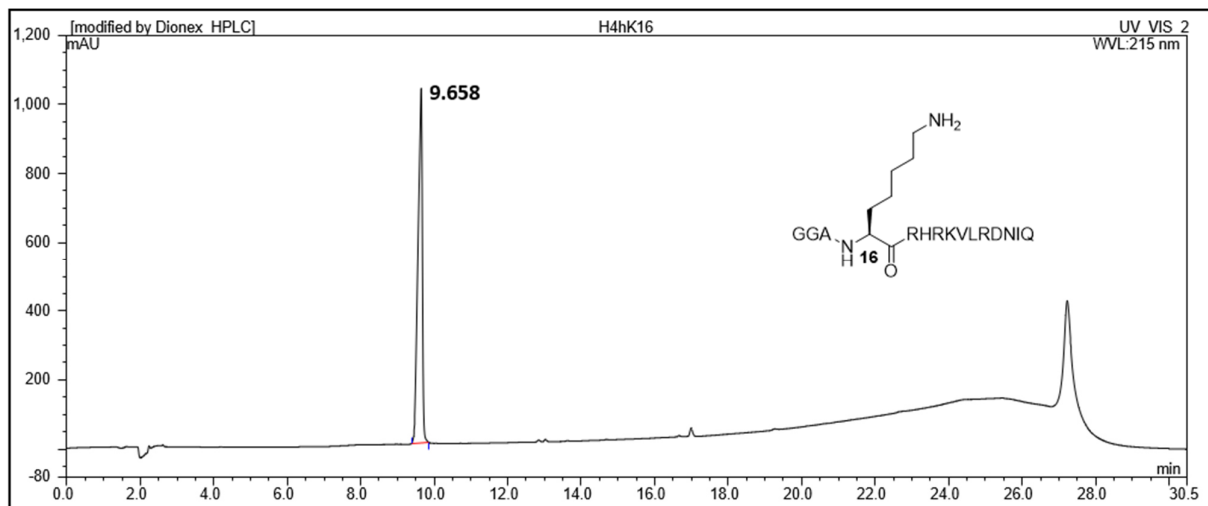

**Figure S5.** Analytical HPLC of the H4hK16 peptide after RP-HPLC purification.

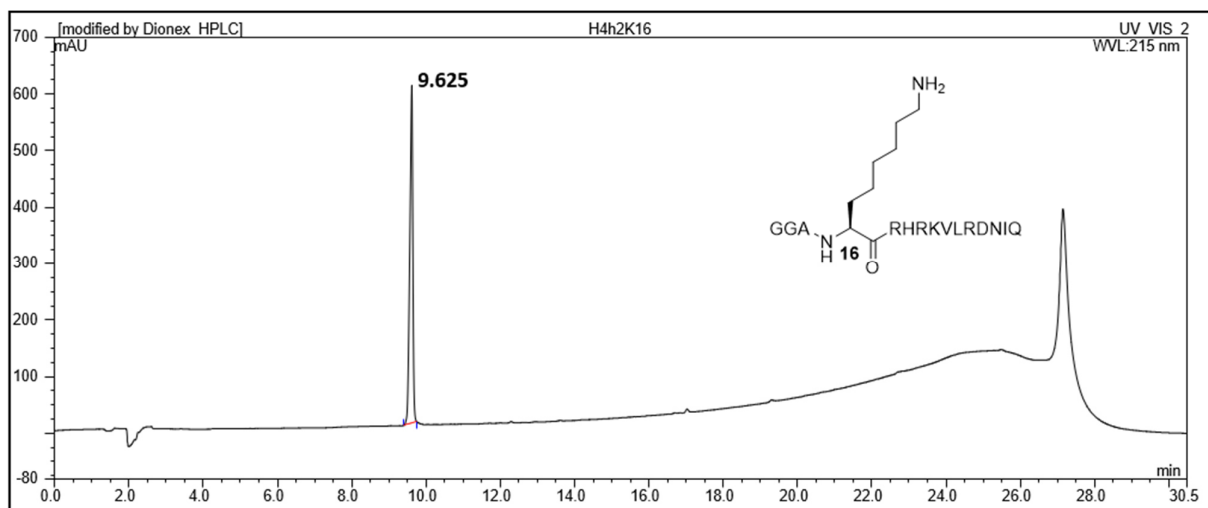

**Figure S6.** Analytical HPLC of the H4h<sub>2</sub>K16 peptide after RP-HPLC purification.

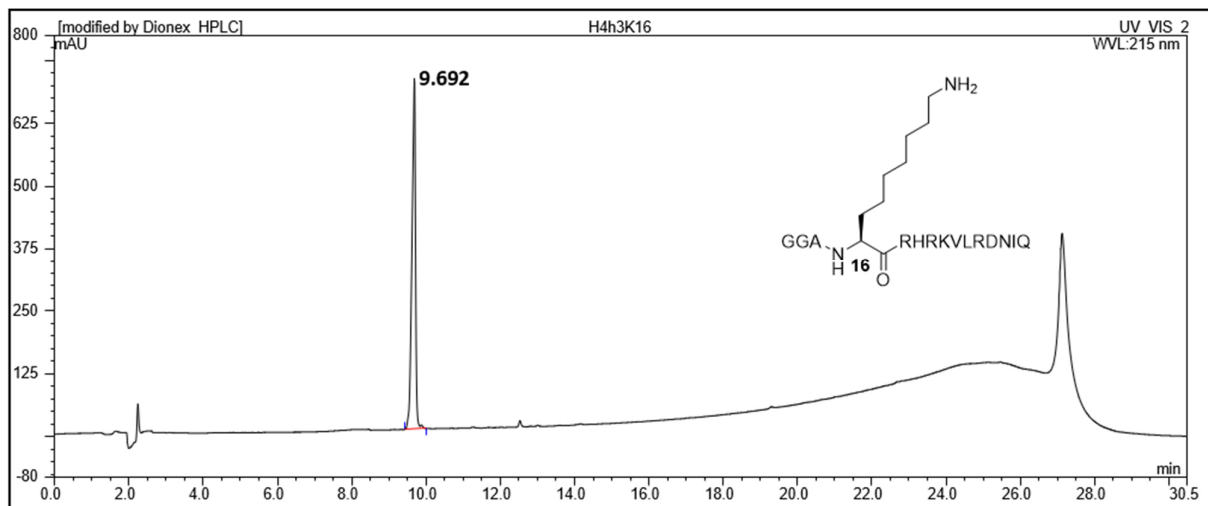

**Figure S7.** Analytical HPLC of the H4h<sub>3</sub>K16 peptide after RP-HPLC purification.

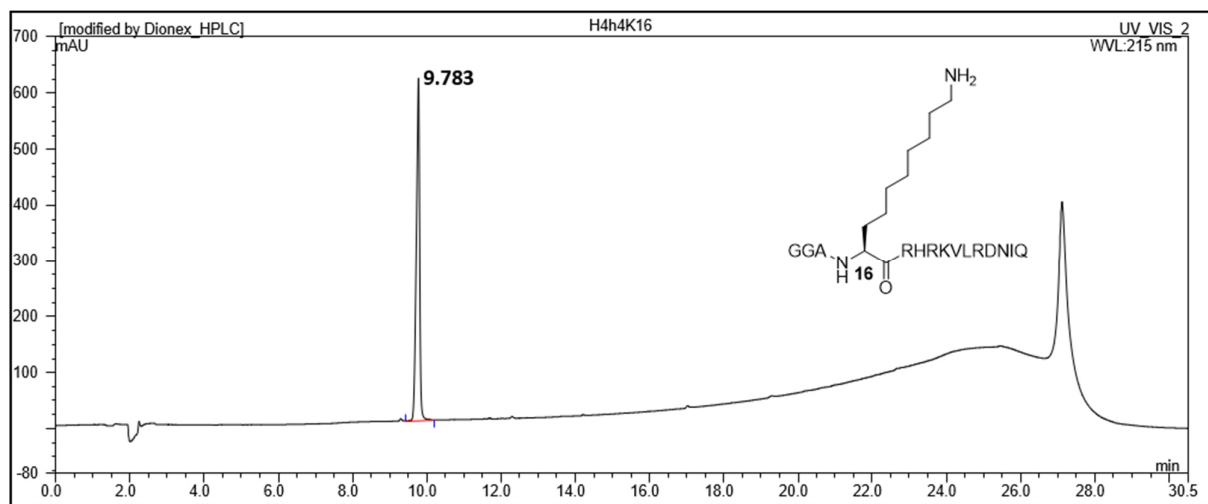

**Figure S8.** Analytical HPLC of the H4h<sub>4</sub>K16 peptide after RP-HPLC purification.

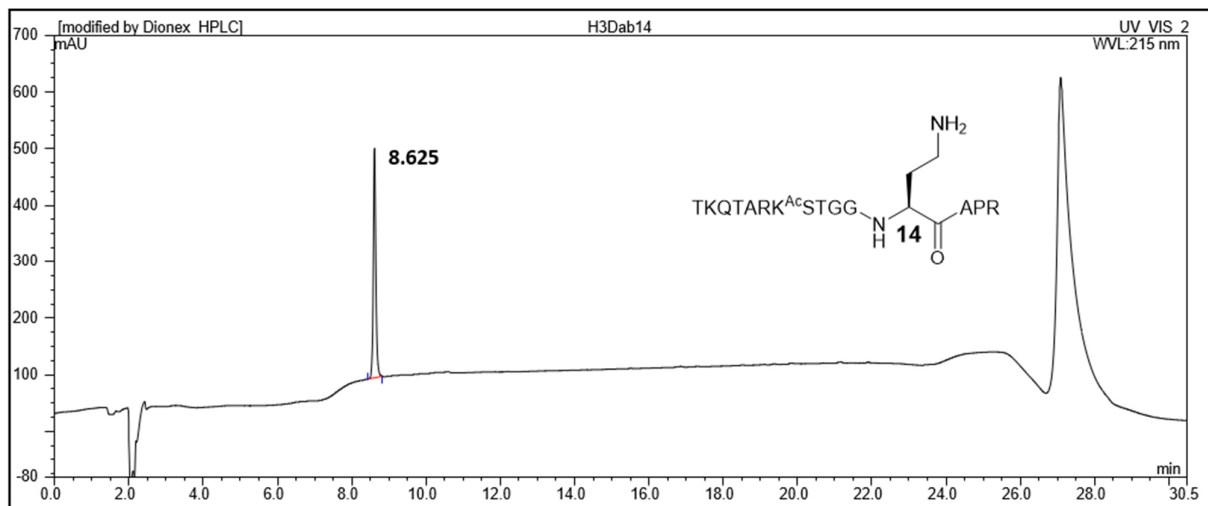

**Figure S9.** Analytical HPLC of the H3Dab14 peptide after RP-HPLC purification.

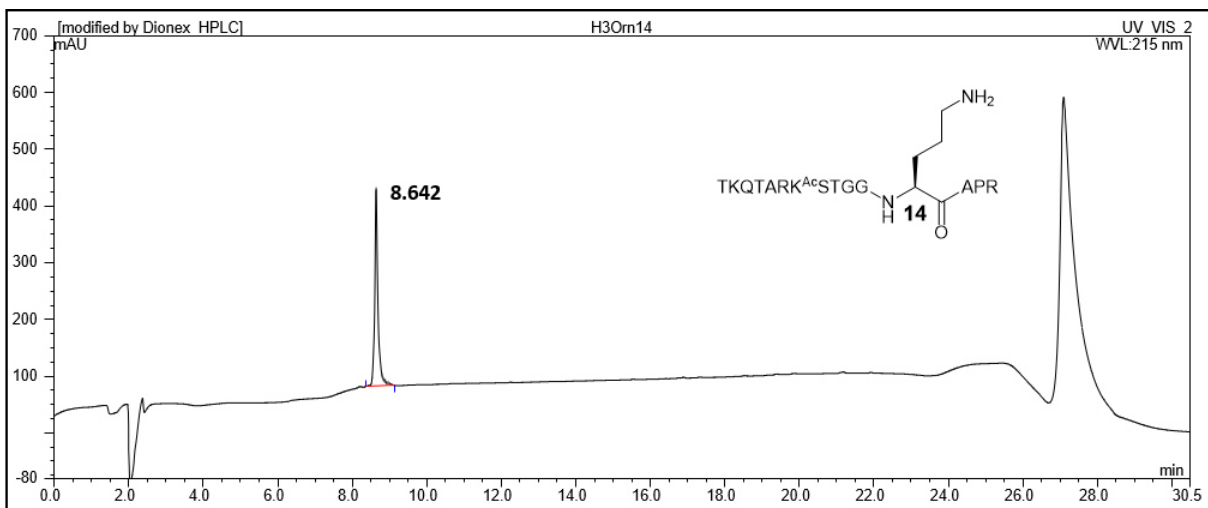

**Figure S10.** Analytical HPLC of the H3Orn14 peptide after RP-HPLC purification.

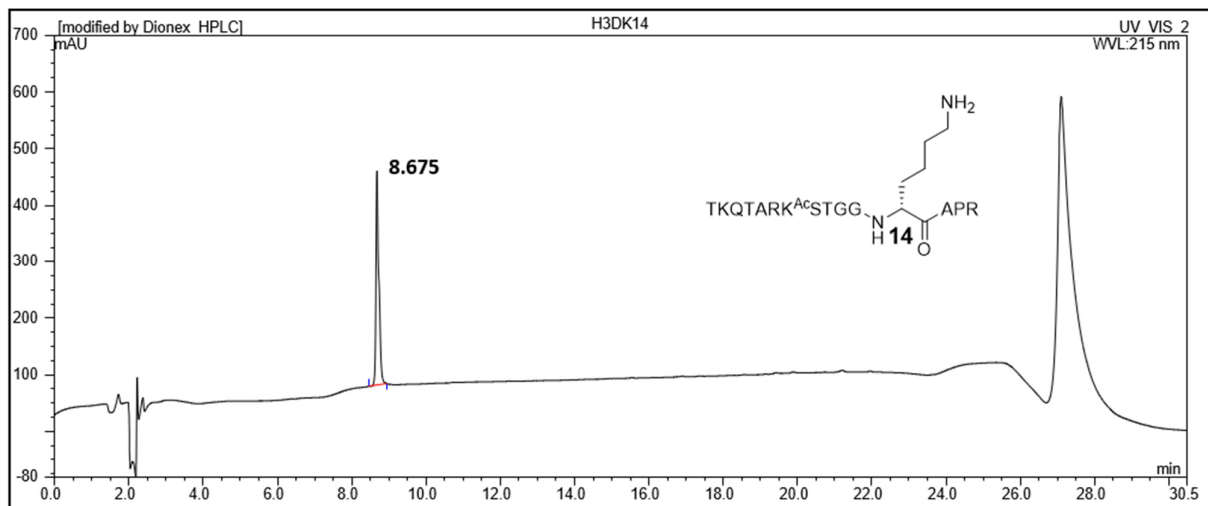

**Figure S11.** Analytical HPLC of the D-H3K14 peptide after RP-HPLC purification.

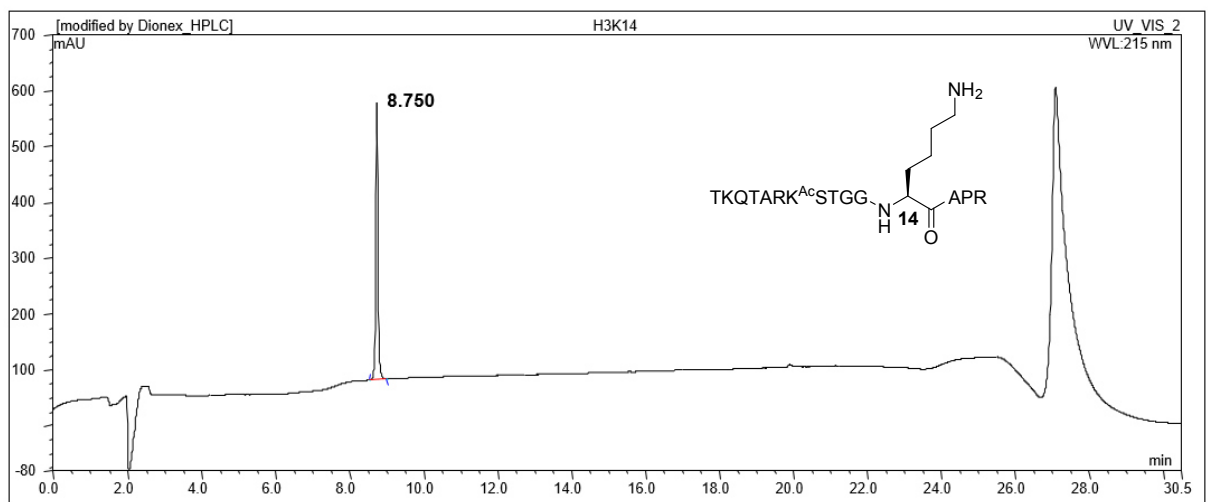

**Figure S12.** Analytical HPLC of the H3K14 peptide after RP-HPLC purification.



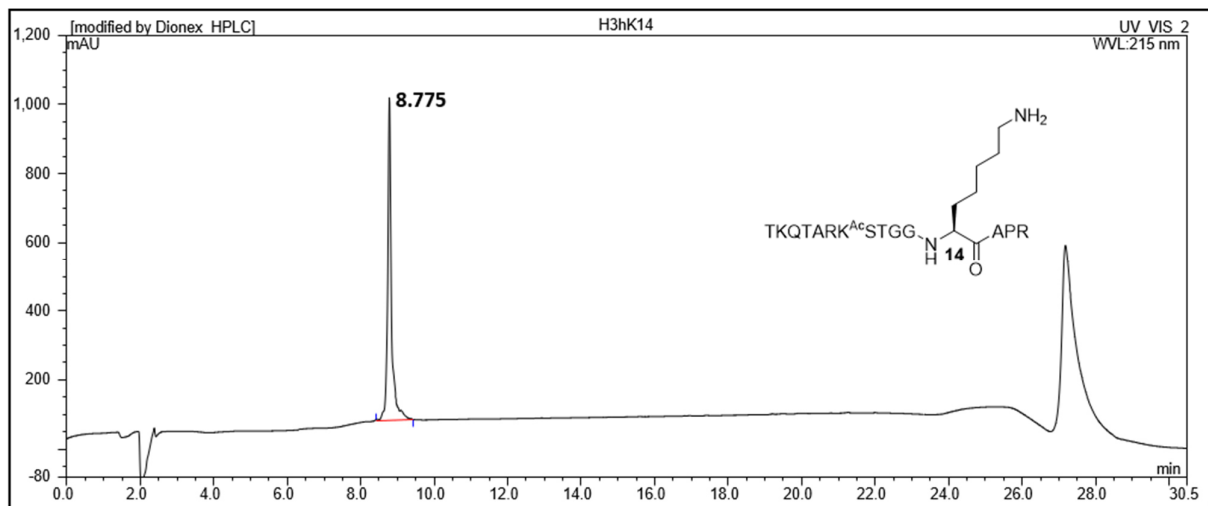

**Figure S13.** Analytical HPLC of the H3hK14 peptide after RP-HPLC purification.

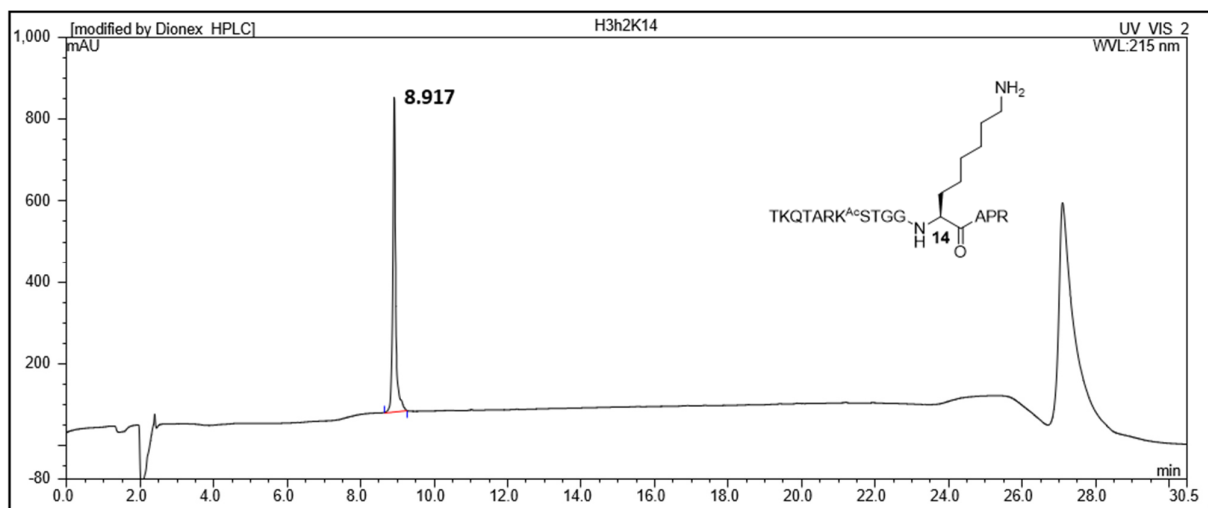

**Figure S14.** Analytical HPLC of the H3h<sub>2</sub>K14 peptide after RP-HPLC purification.

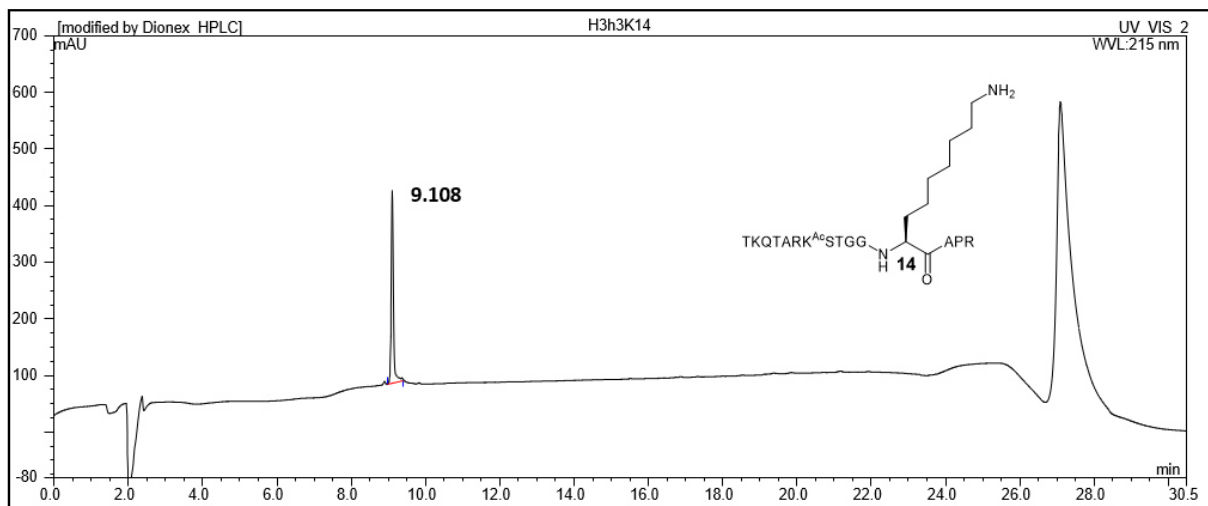

**Figure S15.** Analytical HPLC of the H3h<sub>3</sub>K14 peptide after RP-HPLC purification.

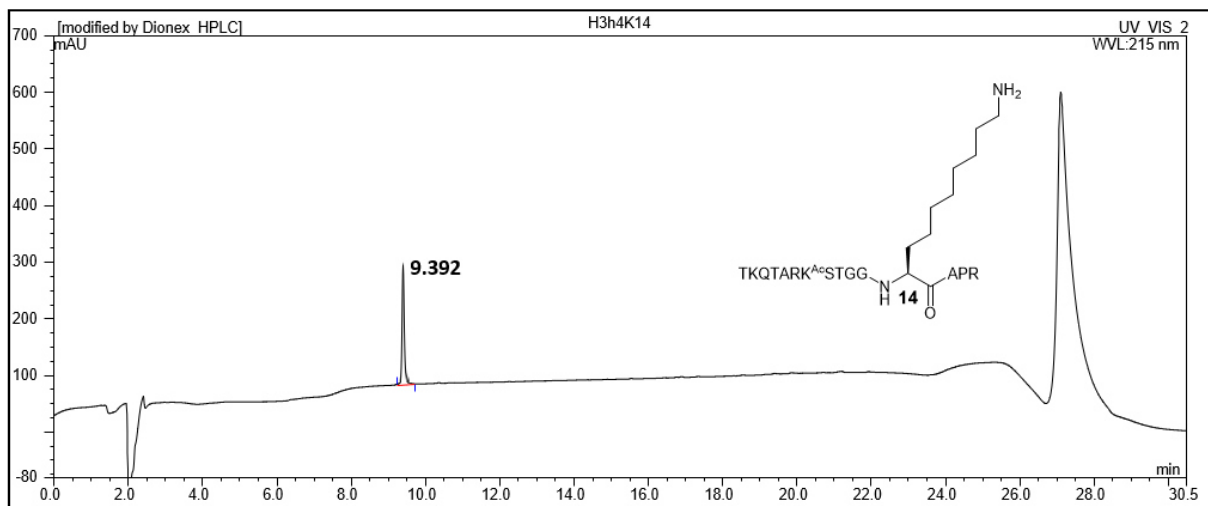

**Figure S16.** Analytical HPLC of the H3h<sub>4</sub>K14 peptide after RP-HPLC purification.

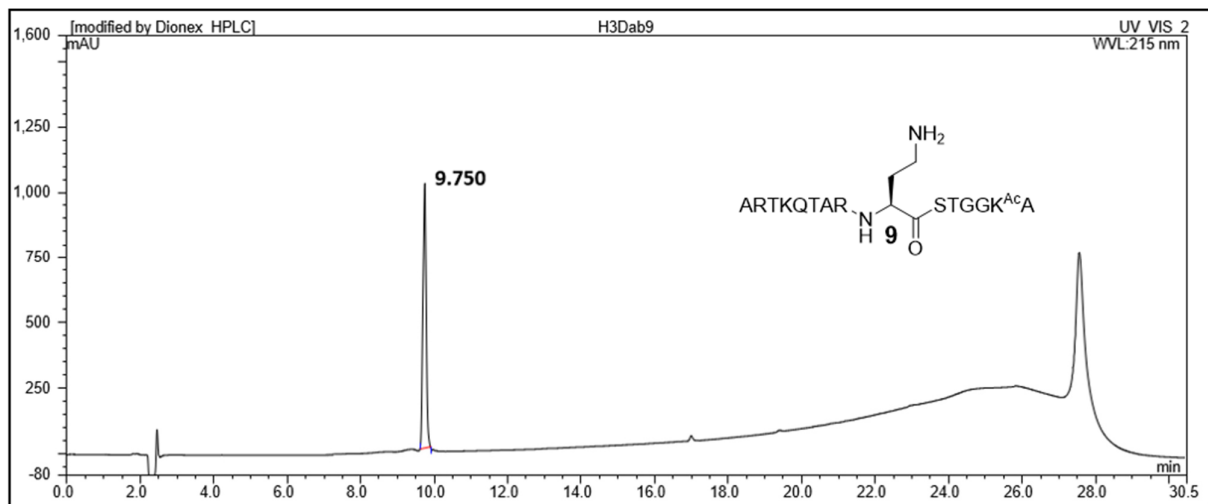

**Figure S17.** Analytical HPLC of the H3Dab9 peptide after RP-HPLC purification.

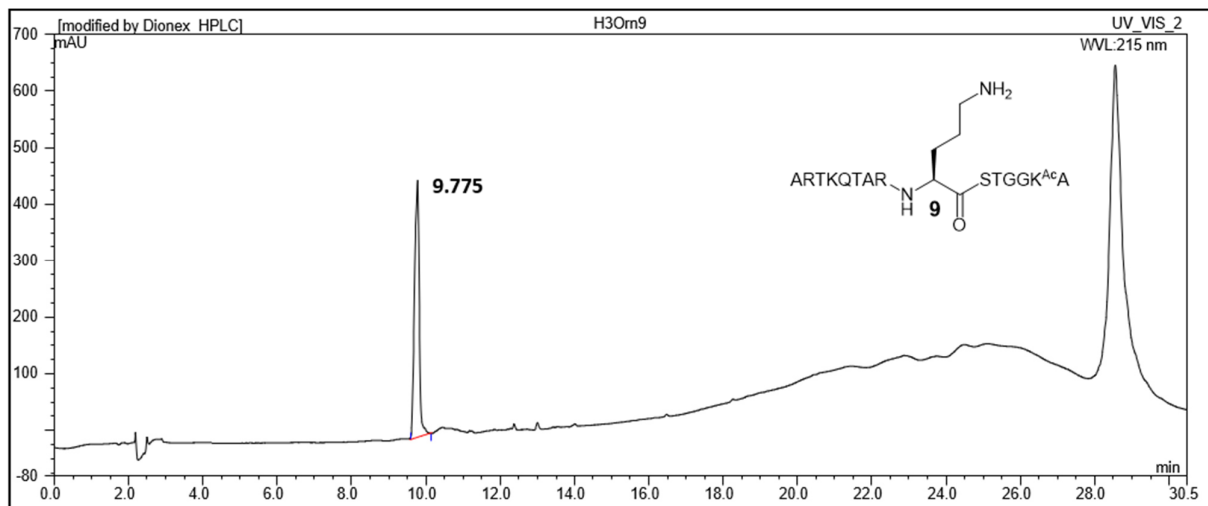

**Figure S18.** Analytical HPLC of the H3Orn9 peptide after RP-HPLC purification.

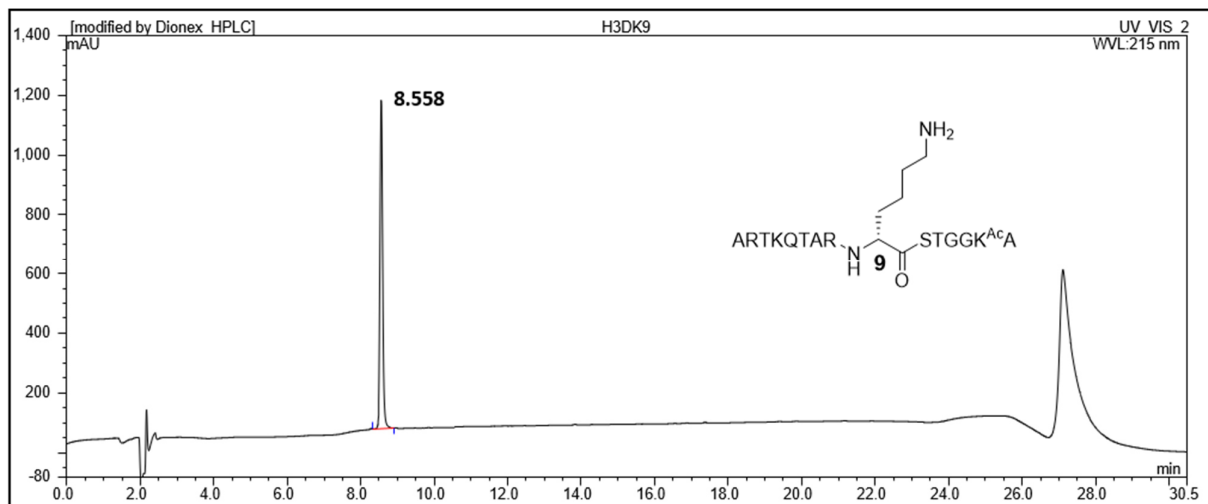

**Figure S19.** Analytical HPLC of the D-H3K9 peptide after RP-HPLC purification.

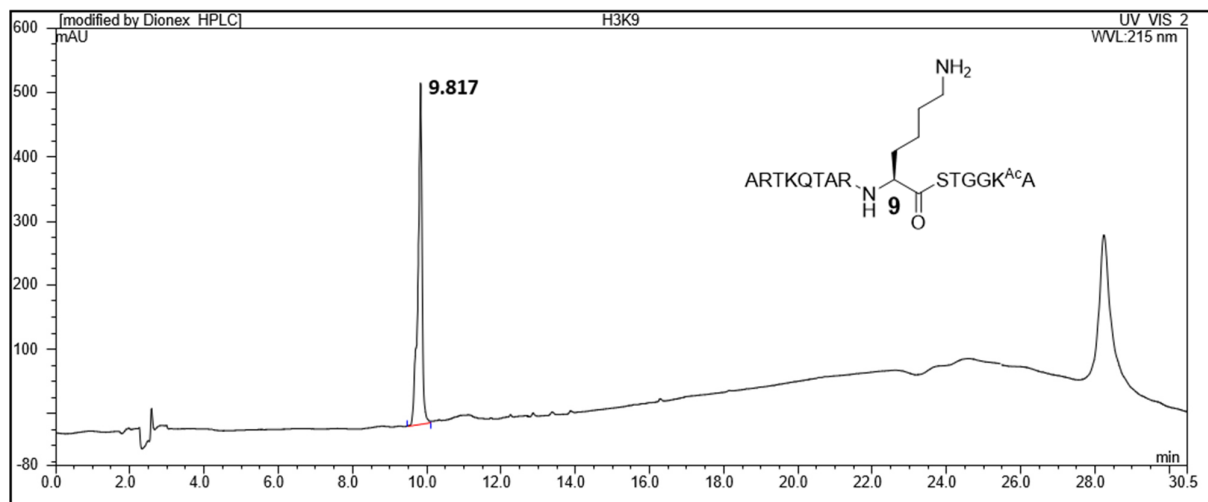

**Figure S20.** Analytical HPLC of the H3K9 peptide after RP-HPLC purification.

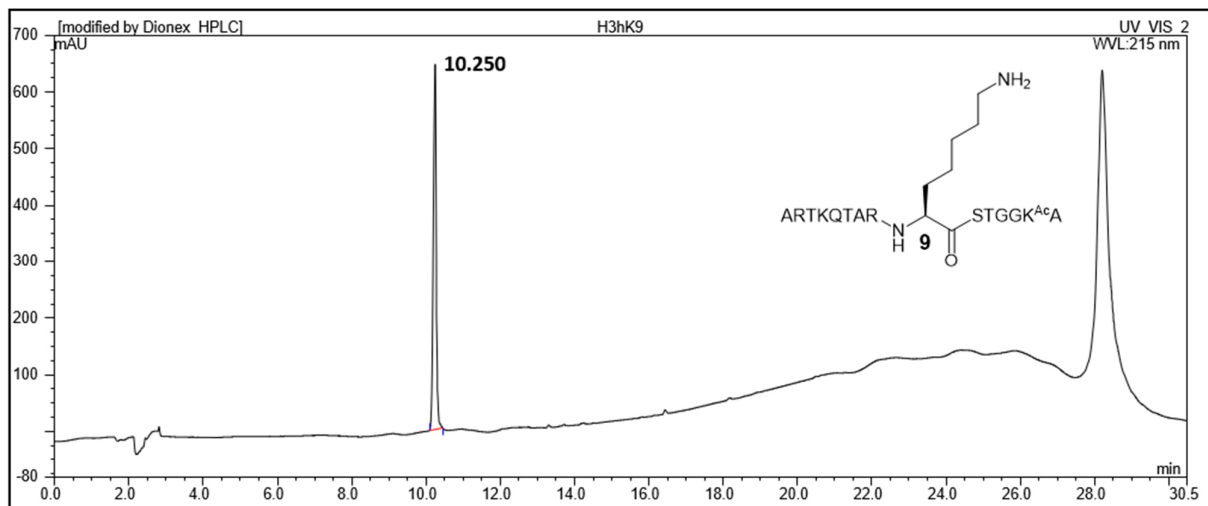

**Figure S21.** Analytical HPLC of the H3hK9 peptide after RP-HPLC purification.

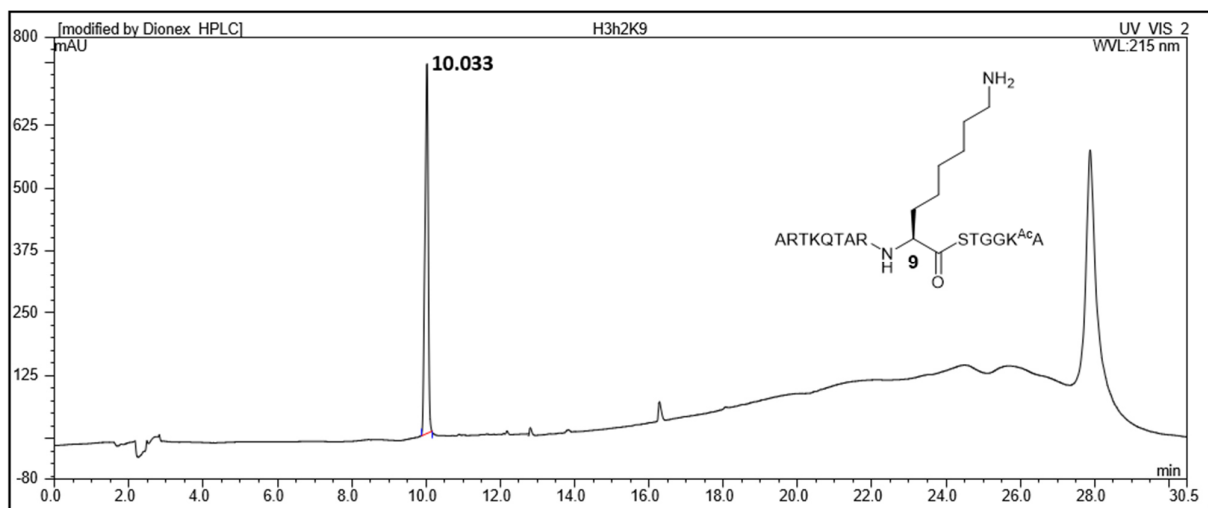

**Figure S22.** Analytical HPLC of the H3h<sub>2</sub>K9 peptide after RP-HPLC purification.

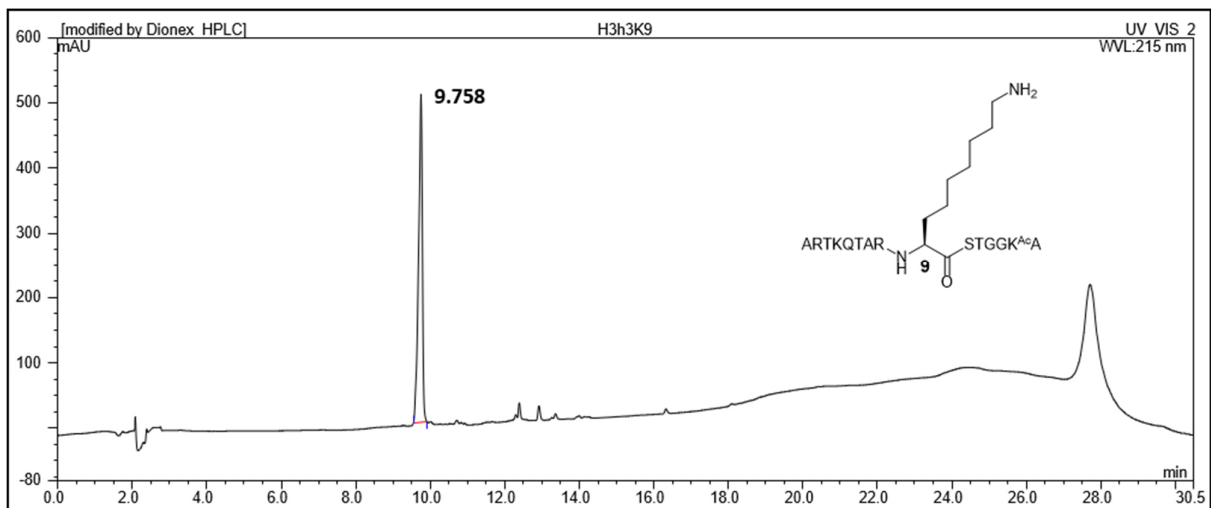

**Figure S23.** Analytical HPLC of the H3h<sub>3</sub>K9 peptide after RP-HPLC purification.

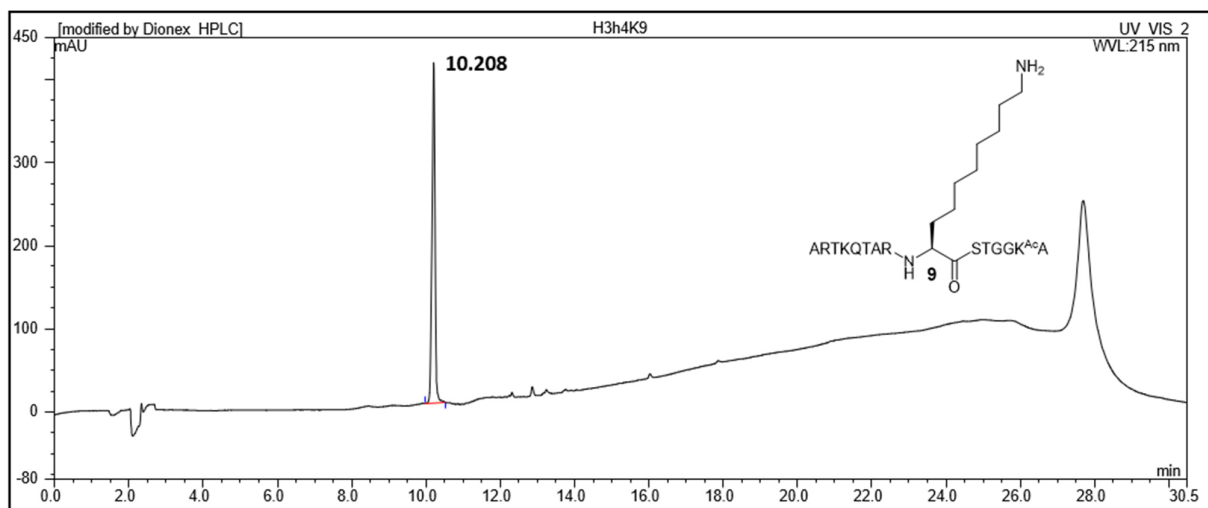

**Figure S24.** Analytical HPLC of the H3h<sub>4</sub>K9 peptide after RP-HPLC purification.

## 6. Time course plot of KAT-catalyzed acetylation

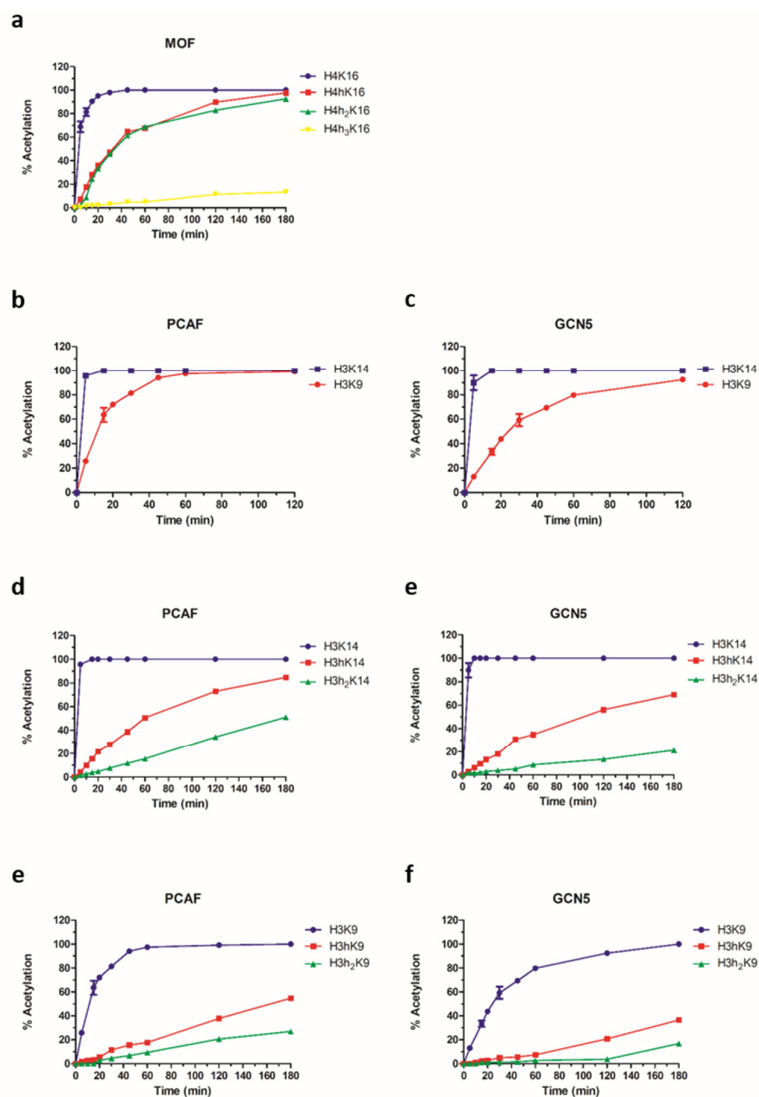

**Figure S25.** Time course analysis of KAT-catalyzed acetylation reactions of chain length extended lysine analogs. (a) MOF-catalyzed acetylation of lysine analogs on the H4K16 sequence. (b) PCAF-catalyzed comparison of acetylation for H3K14 and H3K9 peptides. (c) Gcn5-catalyzed comparison of acetylation for H3K14 and H3K9 peptides. (d) PCAF-catalyzed acetylation of lysine analogs on the H3K14 sequence. (e) PCAF-catalyzed acetylation of lysine analogs on the H3K9 sequence. (e) GCN5-catalyzed acetylation of lysine analogs on the H3K14 sequence. (f) GCN5-catalyzed acetylation of lysine analogs on the H3K9 sequence.

## 7. MALDI-TOF MS acetylation supporting figures

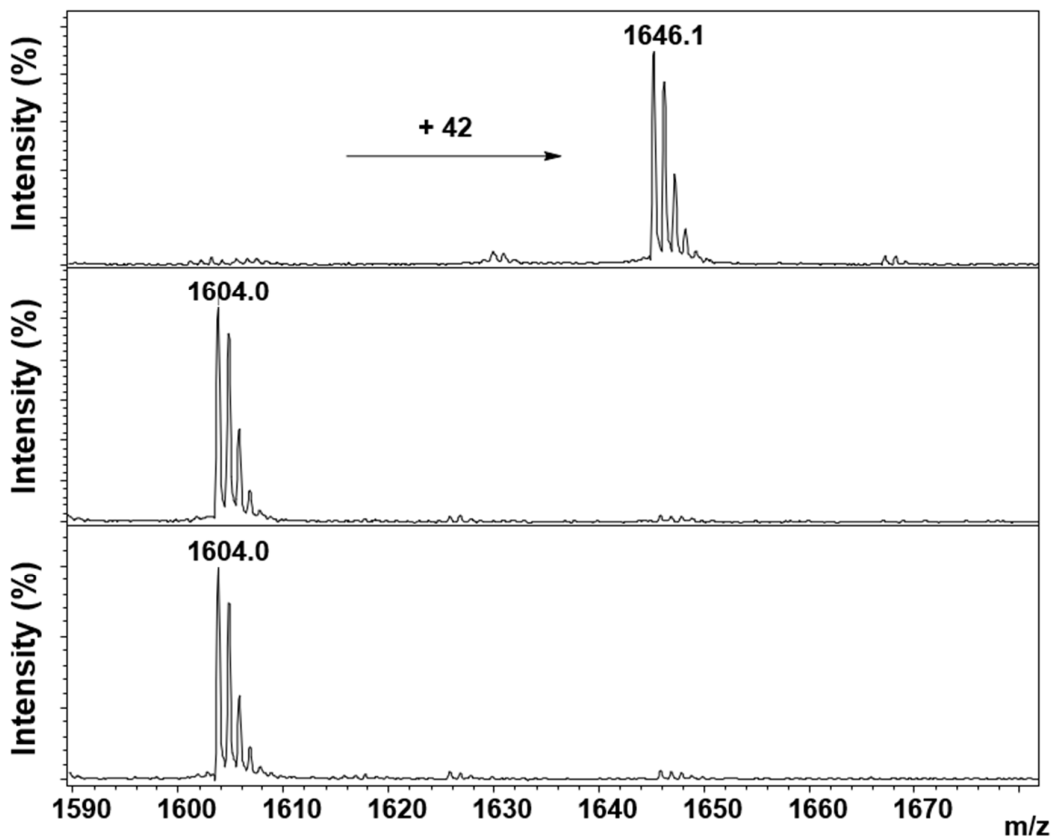

**Figure S26.** MALDI-TOF MS analysis of PCAF (2  $\mu$ M)-catalyzed acetylation reaction of H3K9 peptide (100  $\mu$ M) in the presence of AcCoA (300  $\mu$ M) at 37  $^{\circ}$ C, after 3 h incubation (top panel). Control reactions after 3 h: absence of AcCoA (middle panel), absence of PCAF (bottom panel).



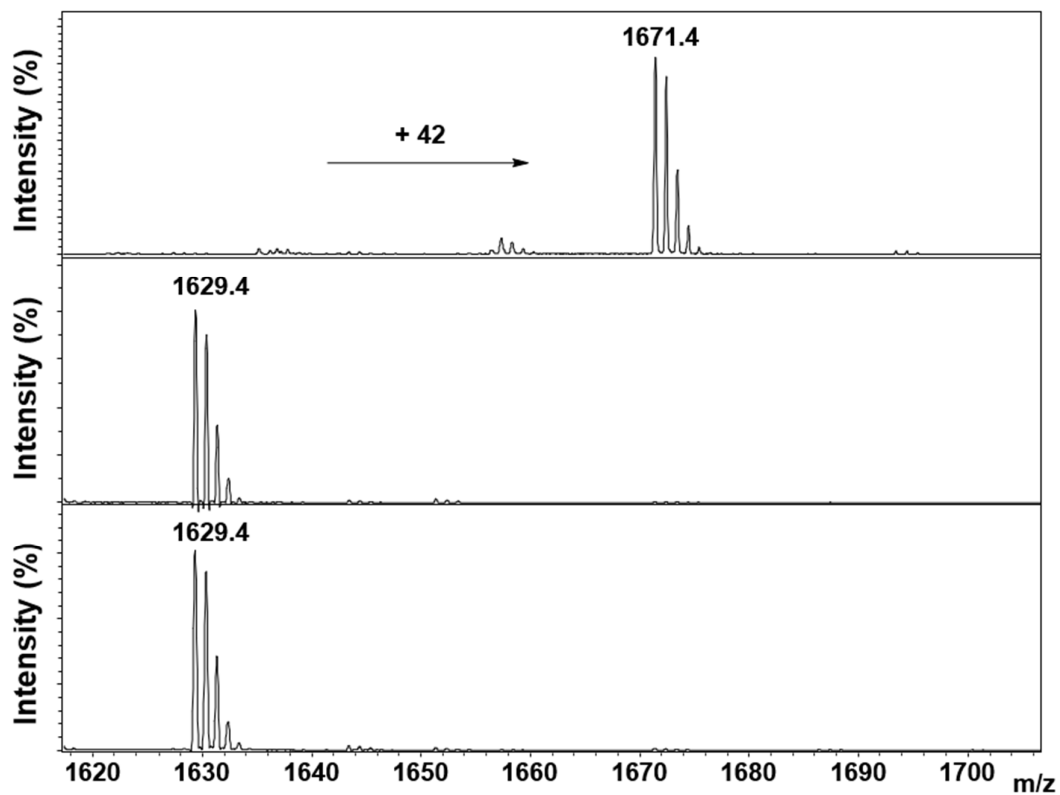

**Figure S27.** MALDI-OF MS analysis of GCN5 (2  $\mu$ M)-catalyzed acetylation reaction of H3K14 peptide (100  $\mu$ M) in the presence of AcCoA (300  $\mu$ M) at 37  $^{\circ}$ C, after 3 h incubation (top panel). Control reactions after 3 h: absence of AcCoA (middle panel), absence of GCN5 (bottom panel).

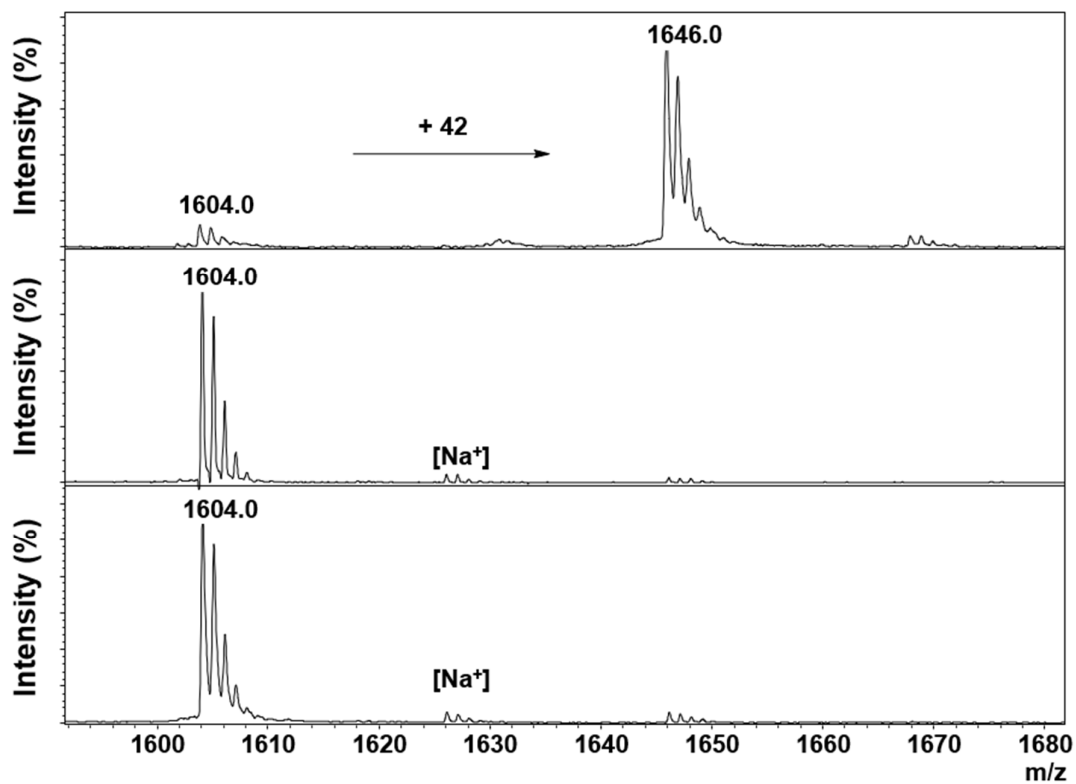

**Figure S28.** MALDI-OF MS analysis of GCN5 (2  $\mu\text{M}$ )-catalyzed acetylation reaction of H3K9 peptide (100  $\mu\text{M}$ ) in the presence of AcCoA (300  $\mu\text{M}$ ) at 37  $^{\circ}\text{C}$ , after 3 h incubation (top panel). Control reactions after 3 h: absence of AcCoA (middle panel), absence of GCN5 (bottom panel).

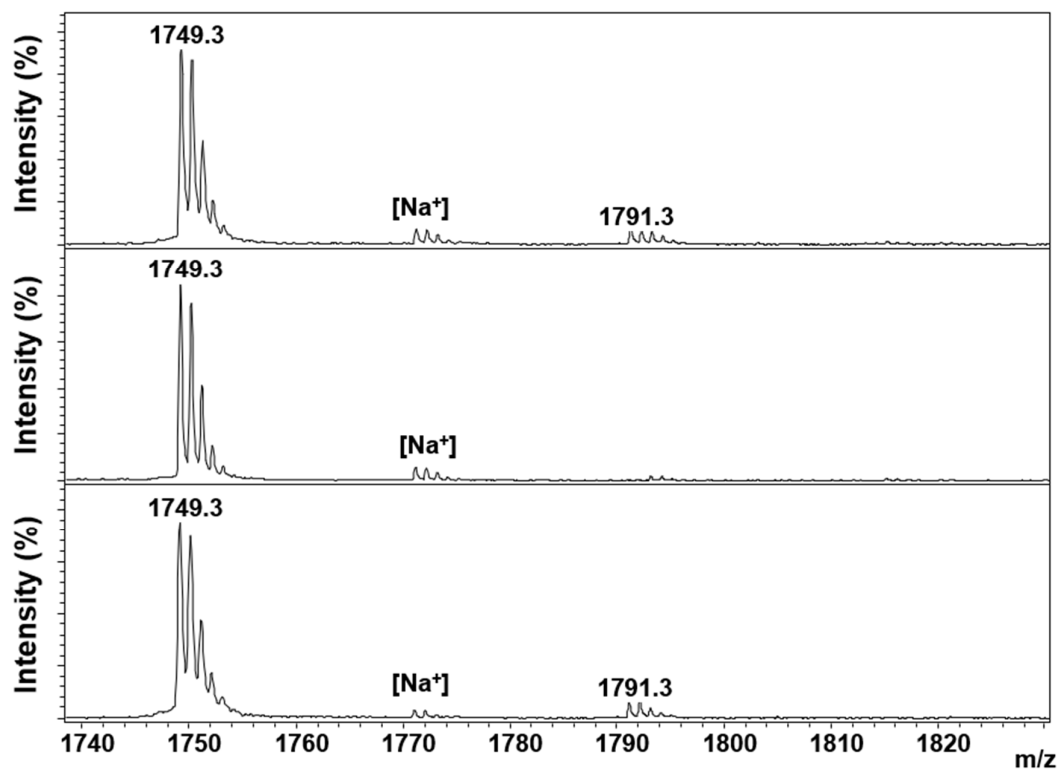

**Figure S29.** MALDI-TOF MS analysis of MOF (2  $\mu\text{M}$ )-catalyzed acetylation reaction of D-H4K16 peptide (100  $\mu\text{M}$ ) in the presence of AcCoA (300  $\mu\text{M}$ ) at 37  $^{\circ}\text{C}$ , after 3 h incubation (top panel). Control reactions after 3 h: absence of AcCoA (middle panel), absence of MOF (bottom panel).

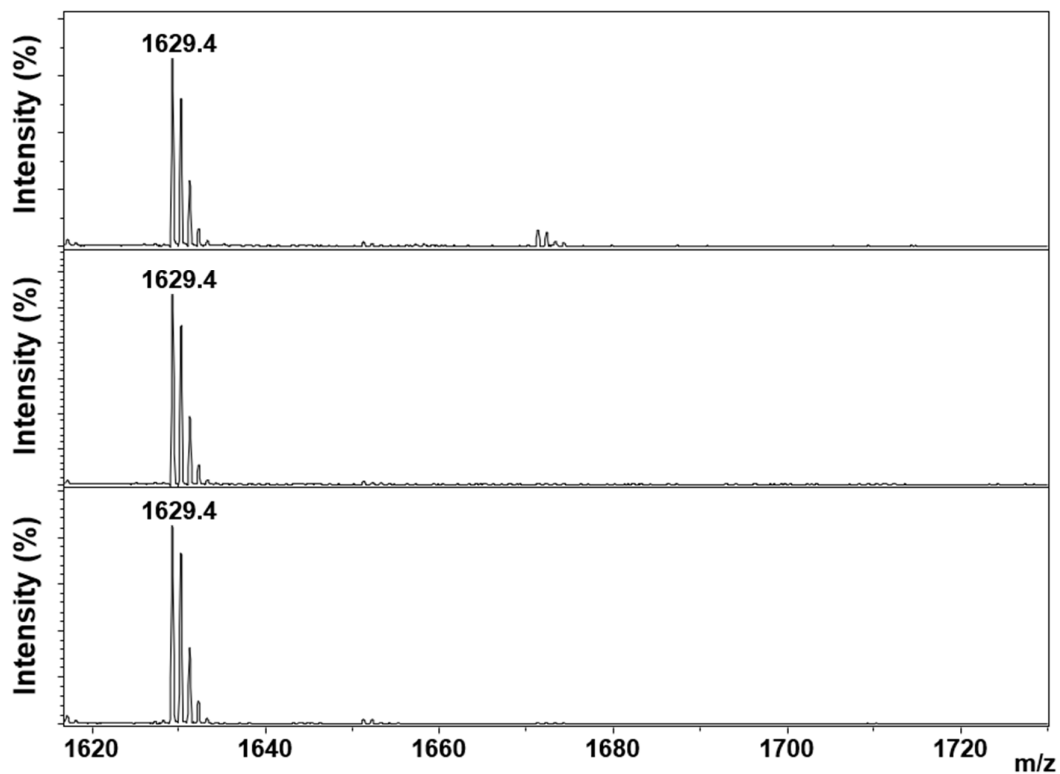

**Figure S30.** MALDI-TOF MS analysis of PCAF (2  $\mu\text{M}$ )-catalyzed acetylation reaction of D-H3K14 peptide (100  $\mu\text{M}$ ) in the presence of AcCoA (300  $\mu\text{M}$ ) at 37  $^{\circ}\text{C}$ , after 3 h incubation (top panel). Control reactions after 3 h: absence of AcCoA (middle panel), absence of PCAF (bottom panel).

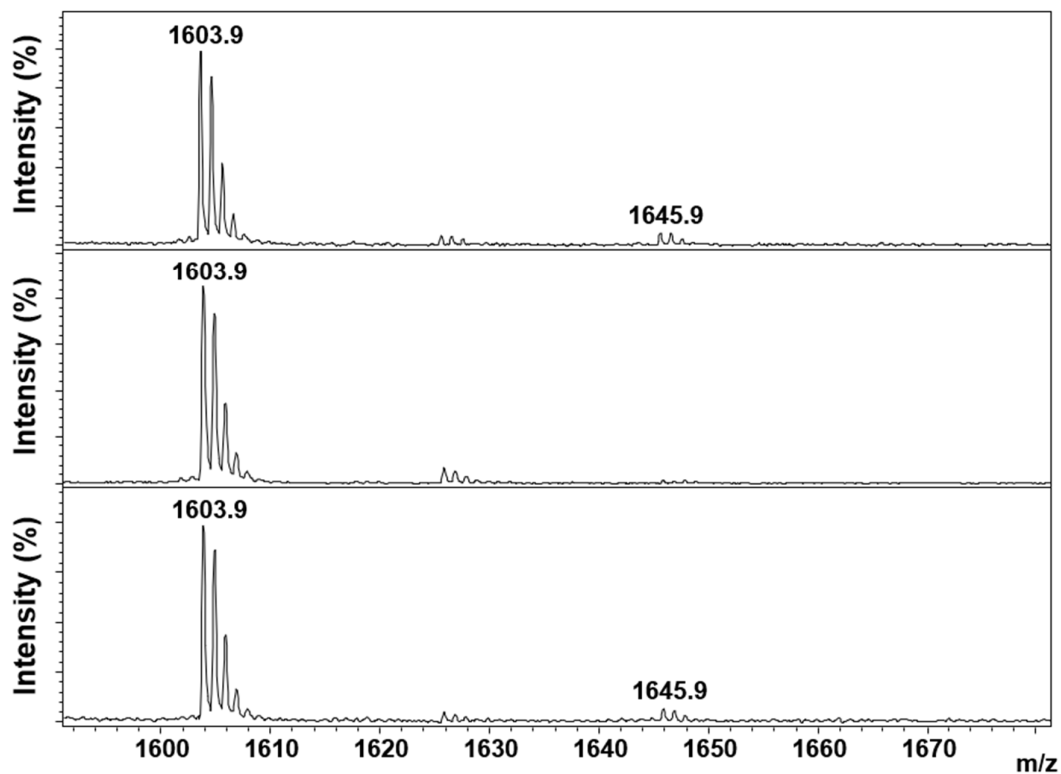

**Figure S31.** MALDI-TOF MS analysis of PCAF (2  $\mu\text{M}$ )-catalyzed acetylation reaction of D-H3K9 peptide (100  $\mu\text{M}$ ) in the presence of AcCoA (300  $\mu\text{M}$ ) at 37  $^{\circ}\text{C}$ , after 3 h incubation (top panel). Control reactions after 3 h: absence of AcCoA (middle panel), absence of PCAF (bottom panel).

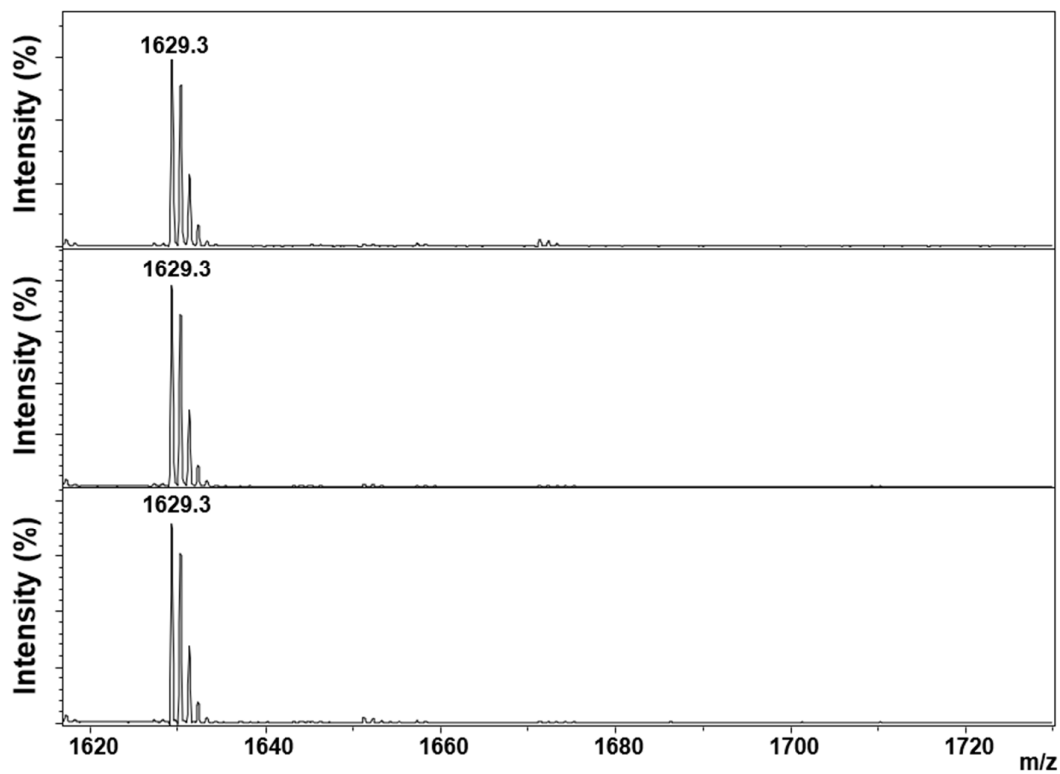

**Figure S32.** MALDI-OF MS analysis of GCN5 (2  $\mu\text{M}$ )-catalyzed acetylation reaction of D-H3K14 peptide (100  $\mu\text{M}$ ) in the presence of AcCoA (300  $\mu\text{M}$ ) at 37  $^{\circ}\text{C}$ , after 3 h incubation (top panel). Control reactions after 3 h: absence of AcCoA (middle panel), absence of GCN5 (bottom panel).

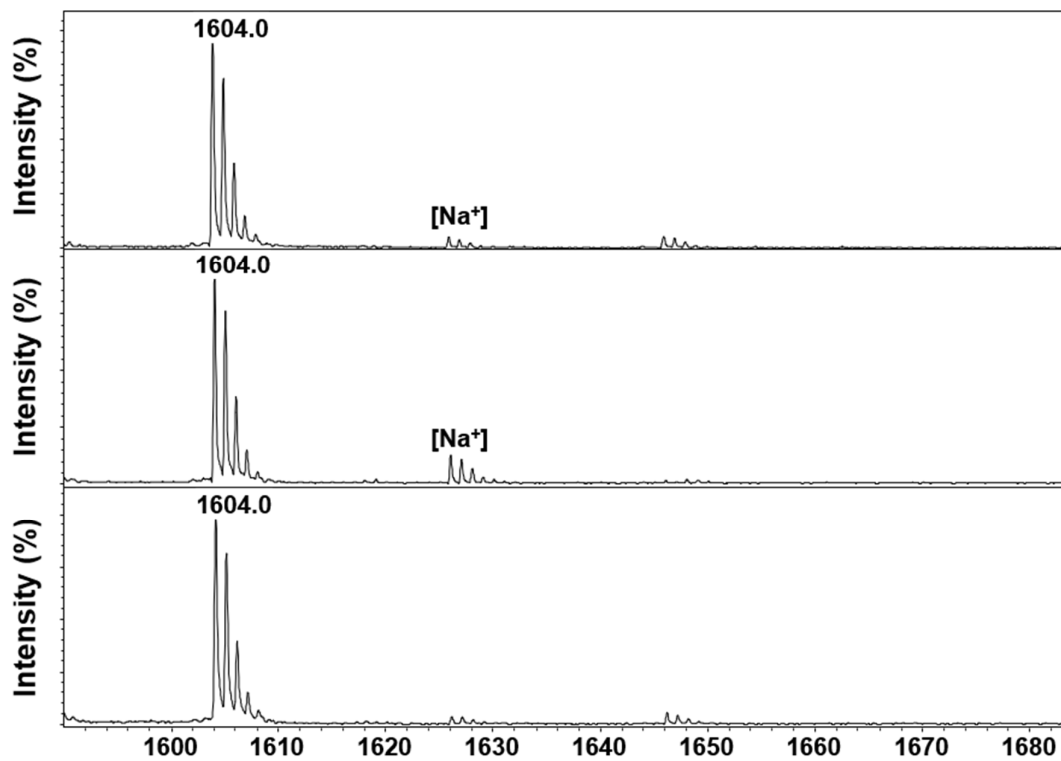

**Figure S33.** MALDI-TOF MS analysis of GCN5 (2  $\mu$ M)-catalyzed acetylation reaction of D-H3K9 peptide (100  $\mu$ M) in the presence of AcCoA (300  $\mu$ M) at 37  $^{\circ}$ C, after 3 h incubation (top panel). Control reactions after 3 h: absence of AcCoA (middle panel), absence of GCN5 (bottom panel).

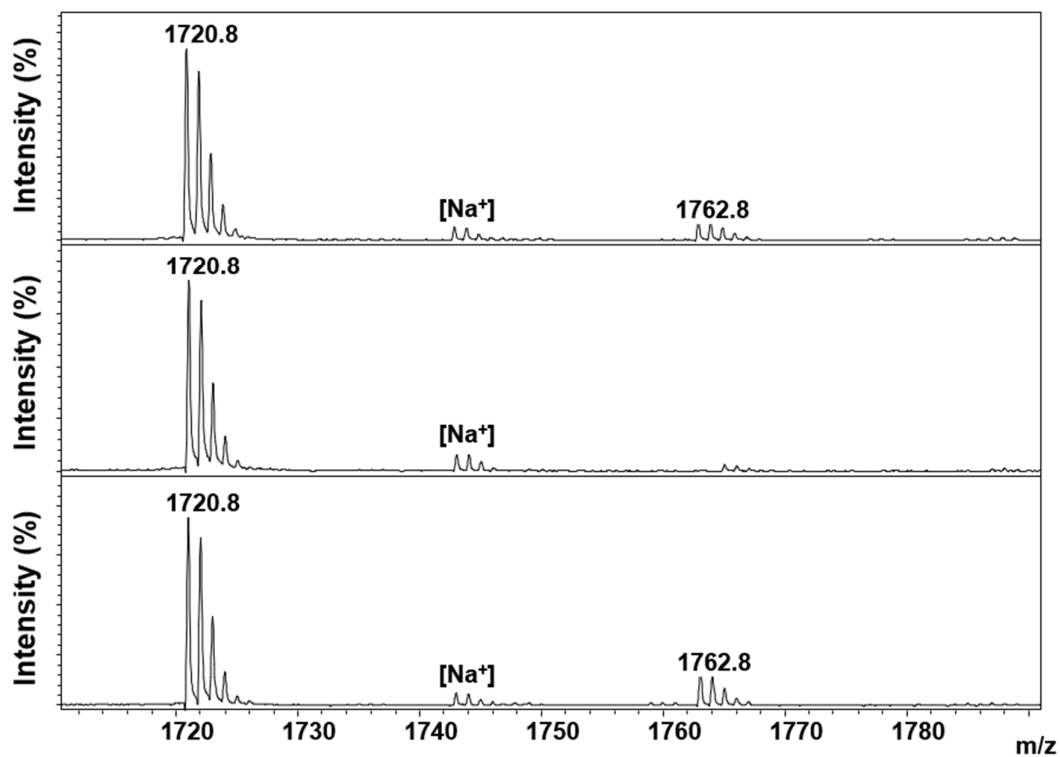

**Figure S34.** MALDI-TOF MS analysis of MOF (2  $\mu$ M)-catalyzed acetylation reaction of H4Dab16 peptide (100  $\mu$ M) in the presence of AcCoA (300  $\mu$ M) at 37  $^{\circ}$ C, after 3 h incubation (top panel). Control reactions after 3 h: absence of AcCoA (middle panel), absence of MOF (bottom panel).



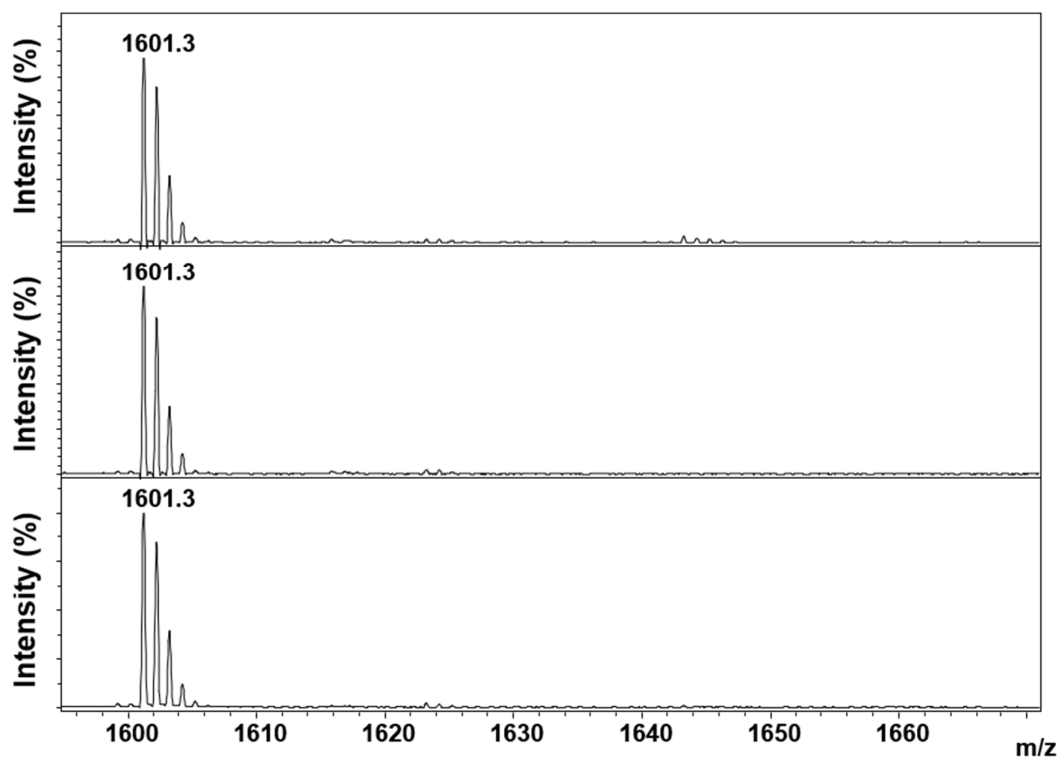

**Figure S35.** MALDI-TOF MS analysis of PCAF (2  $\mu$ M)-catalyzed acetylation reaction of H3Dab14 peptide (100  $\mu$ M) in the presence of AcCoA (300  $\mu$ M) at 37  $^{\circ}$ C, after 3 h incubation (top panel). Control reactions after 3 h: absence of AcCoA (middle panel), absence of PCAF (bottom panel).

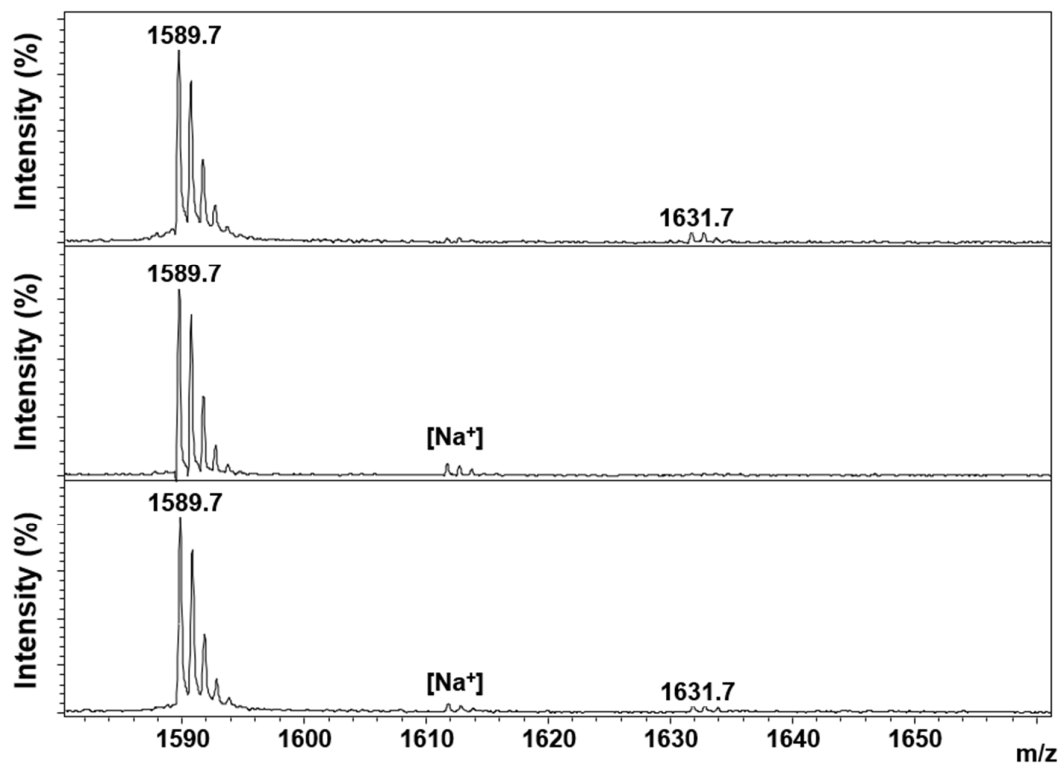

**Figure S36.** MALDI-TOF MS analysis of PCAF (2 μM)-catalyzed acetylation reaction of H3Orn9 peptide (100 μM) in the presence of AcCoA (300 μM) at 37 °C, after 3 h incubation (top panel). Control reactions after 3 h: absence of AcCoA (middle panel), absence of PCAF (bottom panel).

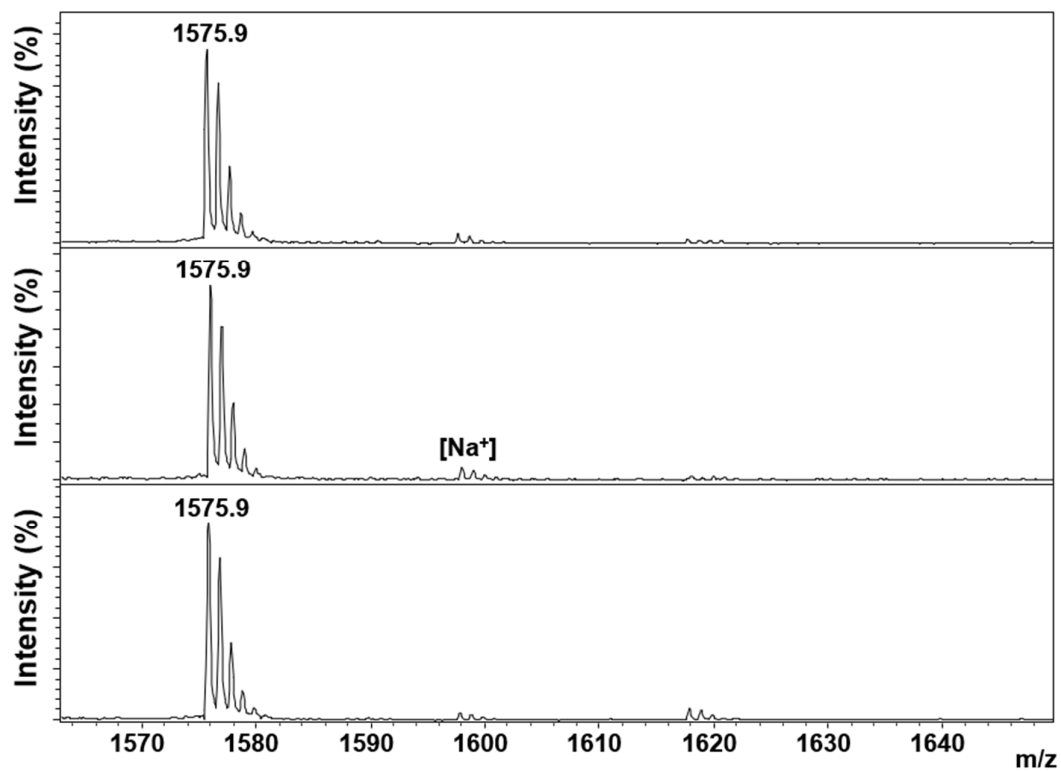

**Figure S37.** MALDI-TOF MS analysis of PCAF (2  $\mu$ M)-catalyzed acetylation reaction of H3Dab9 peptide (100  $\mu$ M) in the presence of AcCoA (300  $\mu$ M) at 37  $^{\circ}$ C, after 3 h incubation (top panel). Control reactions after 3 h: absence of AcCoA (middle panel), absence of PCAF (bottom panel).

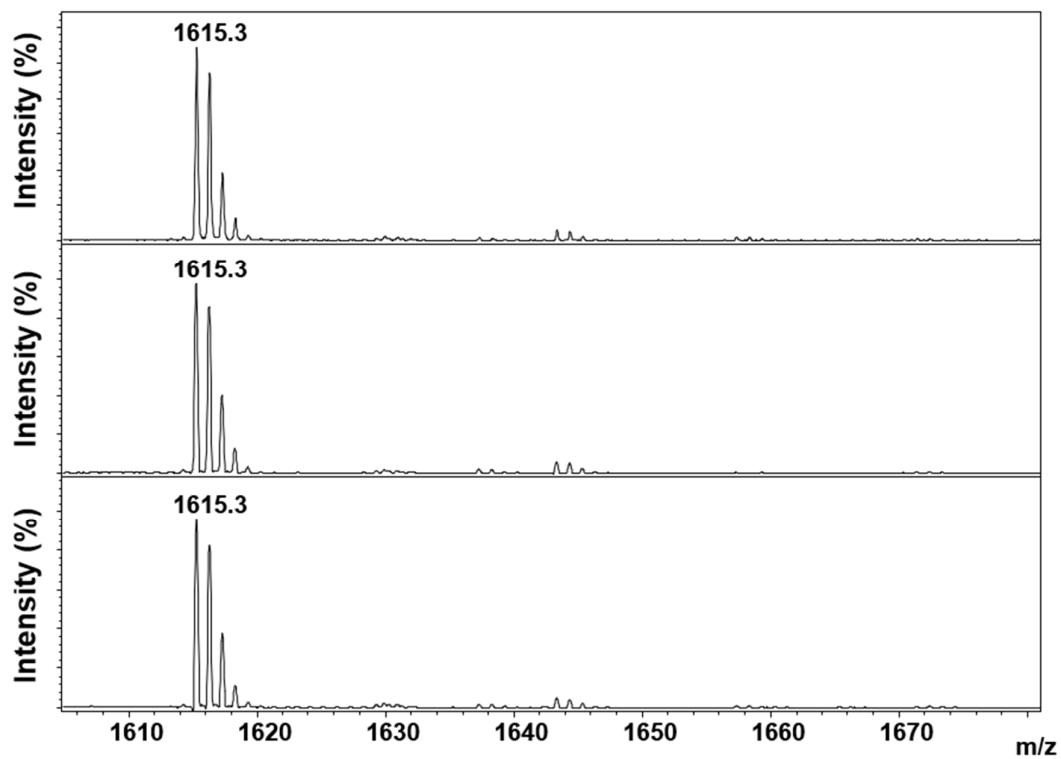

**Figure S38.** MALDI-TOF MS analysis of GCN5 (2  $\mu$ M)-catalyzed acetylation reaction of H3Orn14 peptide (100  $\mu$ M) in the presence of AcCoA (300  $\mu$ M) at 37  $^{\circ}$ C, after 3 h incubation (top panel). Control reactions after 3 h: absence of AcCoA (middle panel), absence of GCN5 (bottom panel).

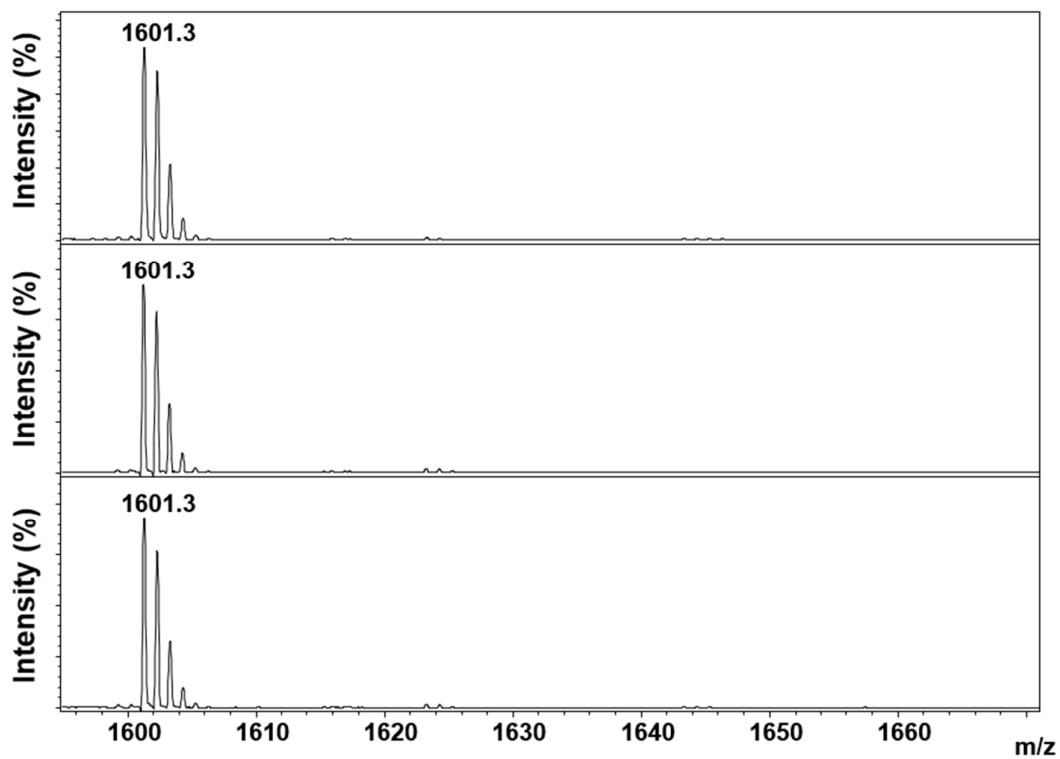

**Figure S39.** MALDI-TOF MS analysis of GCN5 (2  $\mu$ M)-catalyzed acetylation reaction of H3Dab14 peptide (100  $\mu$ M) in the presence of AcCoA (300  $\mu$ M) at 37  $^{\circ}$ C, after 3 h incubation (top panel). Control reactions after 3 h: absence of AcCoA (middle panel), absence of GCN5 (bottom panel).

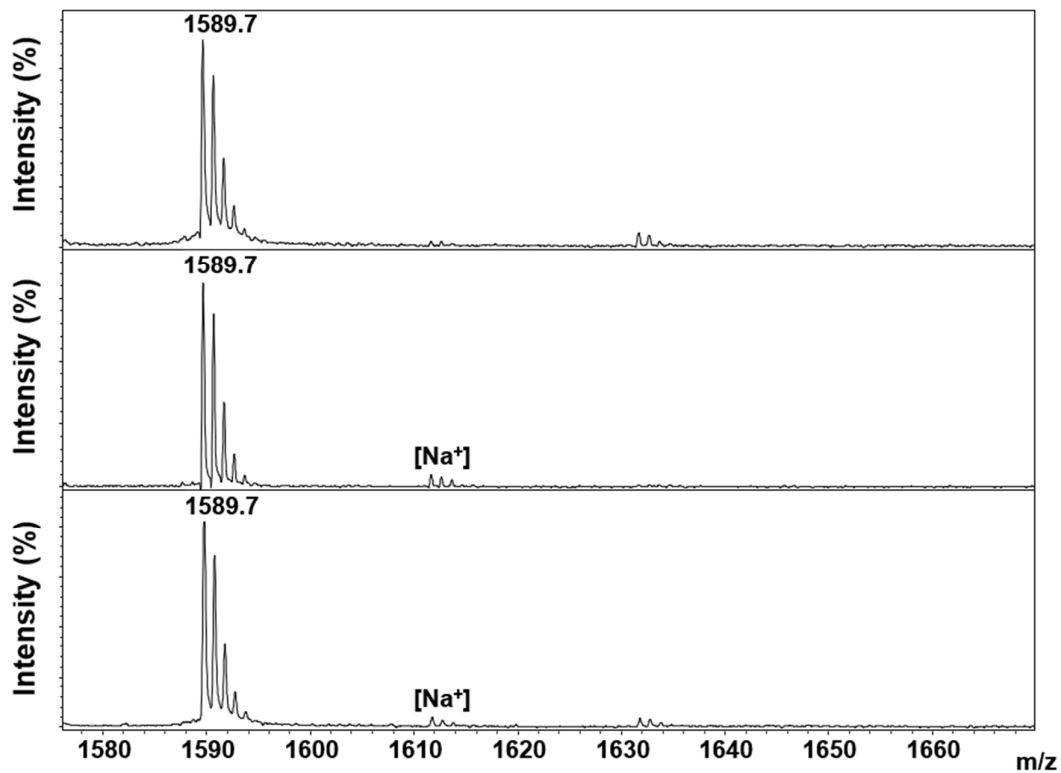

**Figure S40.** MALDI-TOF MS analysis of GCN5 (2  $\mu\text{M}$ )-catalyzed acetylation reaction of H3Orn9 peptide (100  $\mu\text{M}$ ) in the presence of AcCoA (300  $\mu\text{M}$ ) at 37  $^{\circ}\text{C}$ , after 3 h incubation (top panel). Control reactions after 3 h: absence of AcCoA (middle panel), absence of GCN5 (bottom panel).

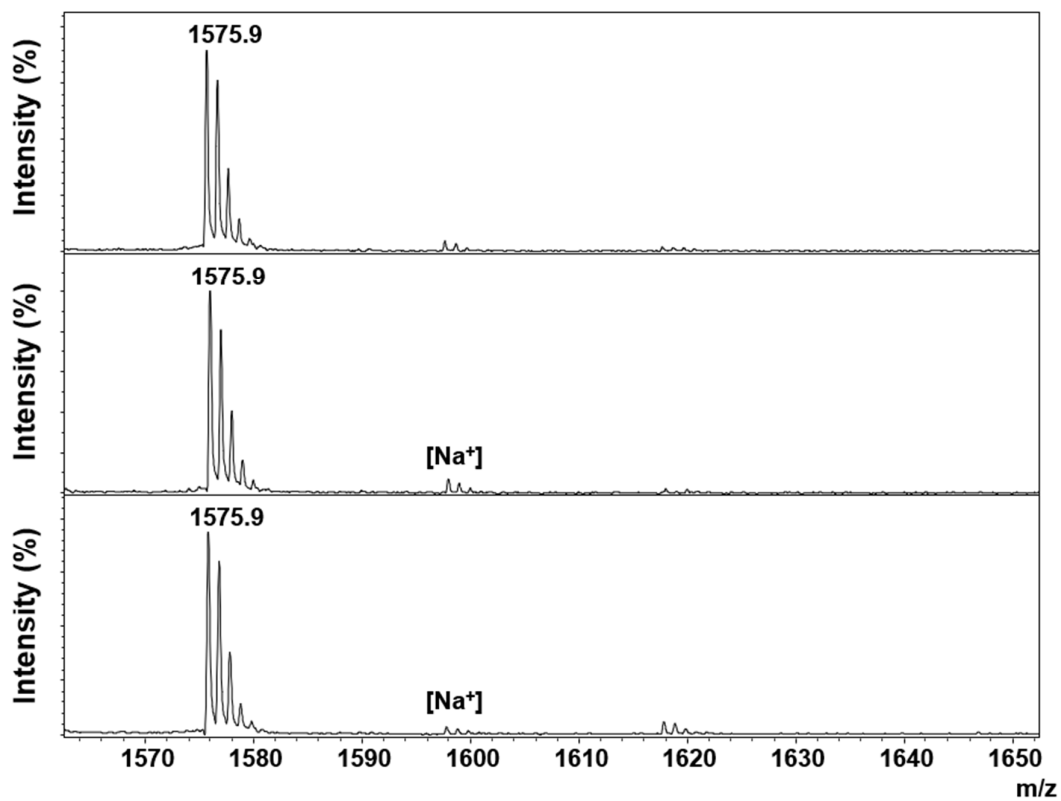

**Figure S41.** MALDI-TOF MS analysis of GCN5 (2  $\mu$ M)-catalyzed acetylation reaction of H3Dab9 peptide (100  $\mu$ M) in the presence of AcCoA (300  $\mu$ M) at 37  $^{\circ}$ C, after 3 h incubation (top panel). Control reactions after 3 h: absence of AcCoA (middle panel), absence of GCN5 (bottom panel).

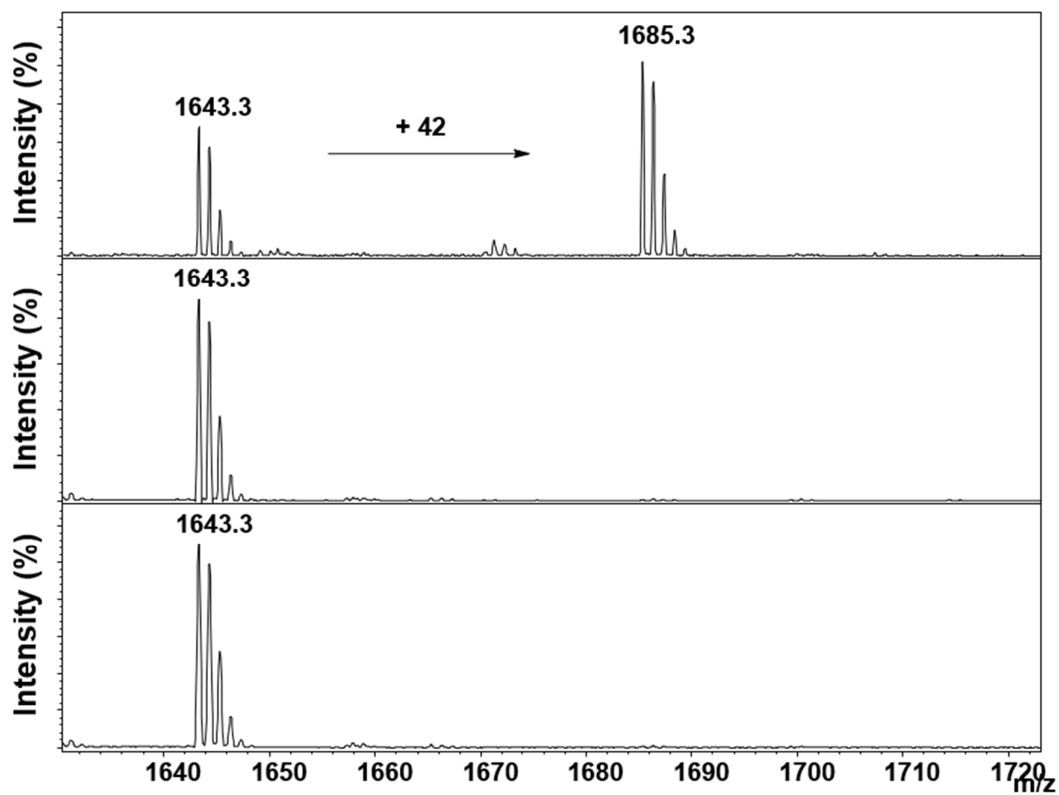

**Figure S42.** MALDI-TOF MS analysis of GCN5 (2 μM)-catalyzed acetylation reaction of H3hK14 peptide (100 μM) in the presence of AcCoA (300 μM) at 37 °C, after 3 h incubation (top panel). Control reactions after 3 h: absence of AcCoA (middle panel), absence of GCN5 (bottom panel).



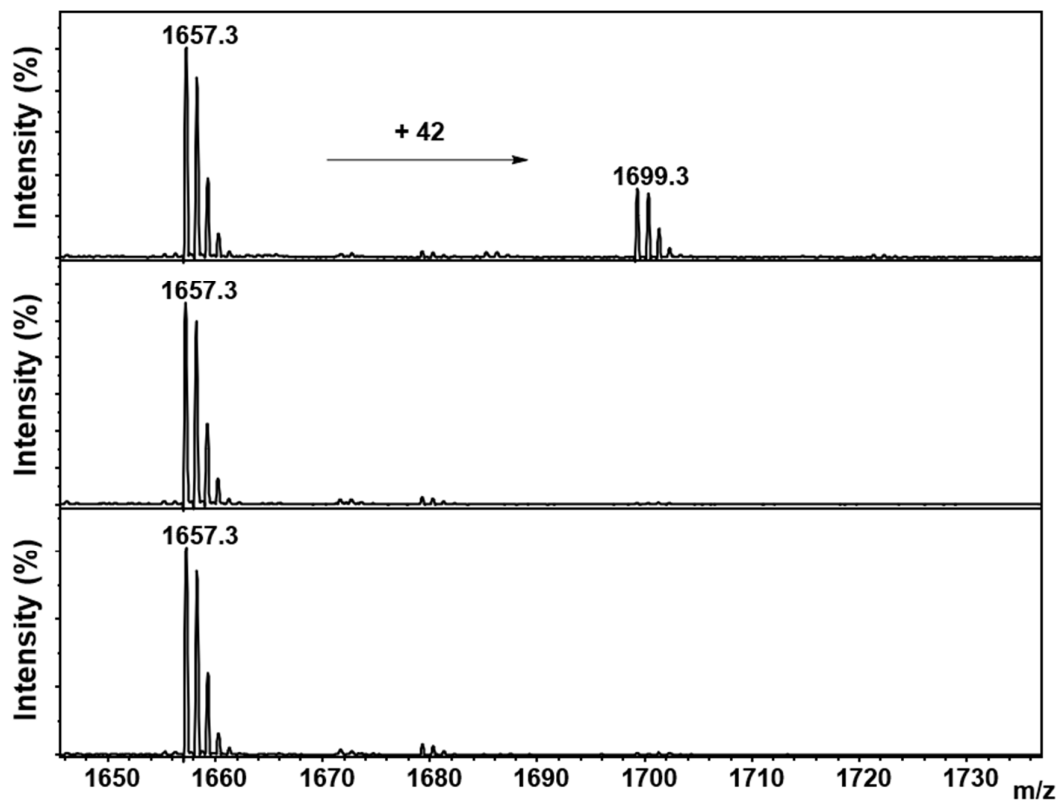

**Figure S43.** MALDI-TOF MS analysis of GCN5 (2  $\mu$ M)-catalyzed acetylation reaction of H3h<sub>2</sub>K14 peptide (100  $\mu$ M) in the presence of AcCoA (300  $\mu$ M) at 37 °C, after 3 h incubation (top panel). Control reactions after 3 h: absence of AcCoA (middle panel), absence of GCN5 (bottom panel).

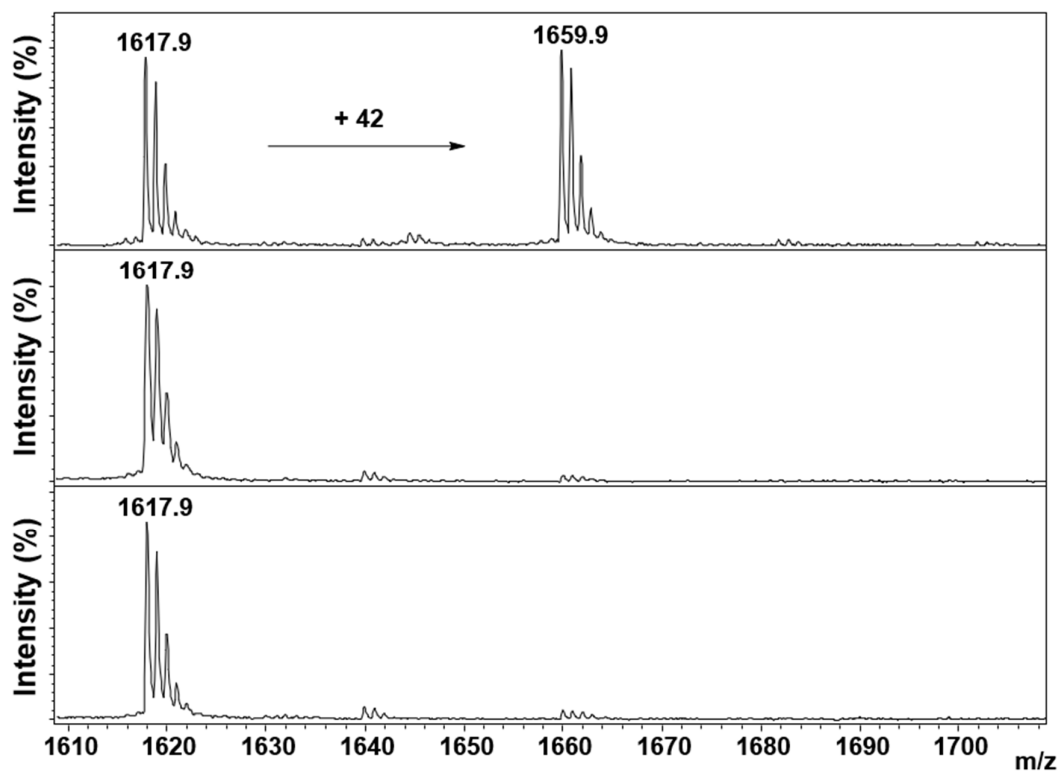

**Figure S44.** MALDI-TOF MS analysis of PCAF (2 μM)-catalyzed acetylation reaction of H3hK9 peptide (100 μM) in the presence of AcCoA (300 μM) at 37 °C, after 3 h incubation (top panel). Control reactions after 3 h: absence of AcCoA (middle panel), absence of PCAF (bottom panel).

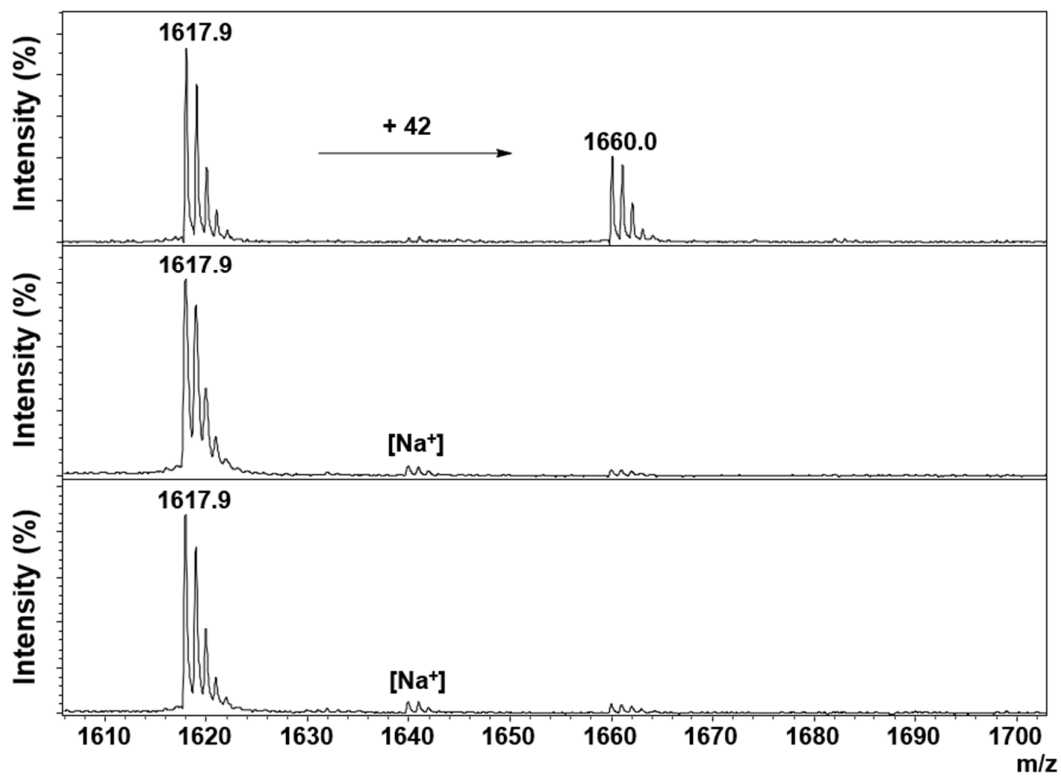

**Figure S45.** MALDI-TOF MS analysis of GCN5 (2  $\mu$ M)-catalyzed acetylation reaction of H3hK9 peptide (100  $\mu$ M) in the presence of AcCoA (300  $\mu$ M) at 37  $^{\circ}$ C, after 3 h incubation (top panel). Control reactions after 3 h: absence of AcCoA (middle panel), absence of GCN5 (bottom panel).

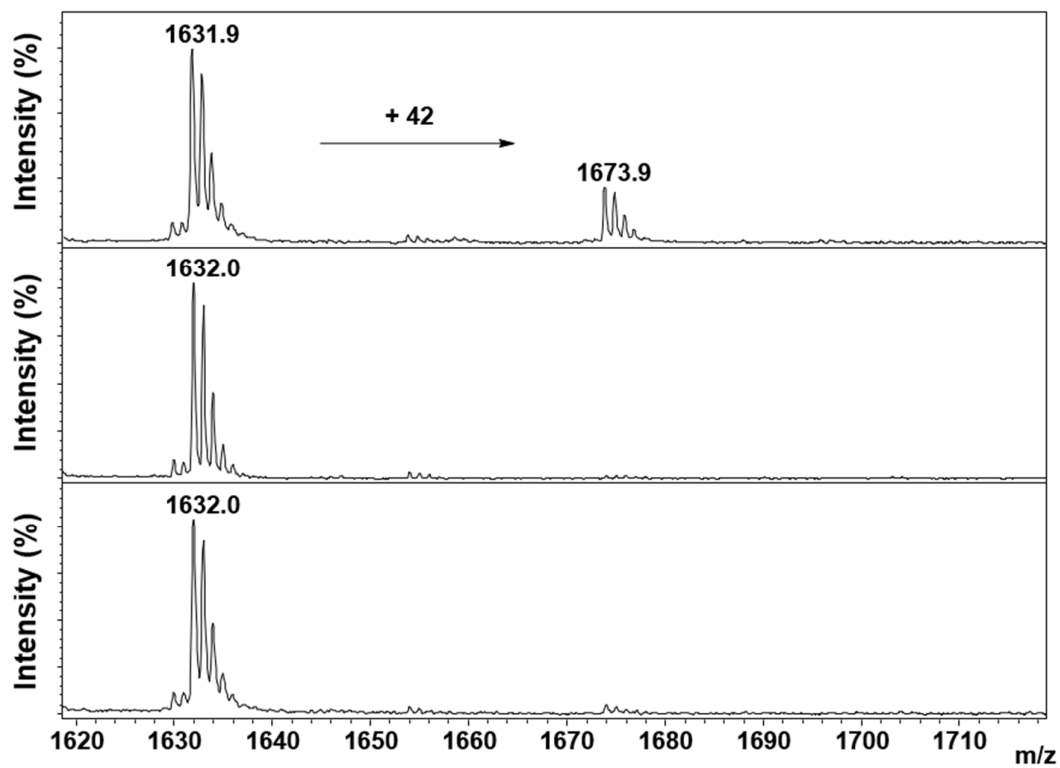

**Figure S46.** MALDI-TOF MS analysis of PCAF (2  $\mu$ M)-catalyzed acetylation reaction of H3h2K9 peptide (100  $\mu$ M) in the presence of AcCoA (300  $\mu$ M) at 37  $^{\circ}$ C, after 3 h incubation (top panel). Control reactions after 3 h: absence of AcCoA (middle panel), absence of PCAF (bottom panel).

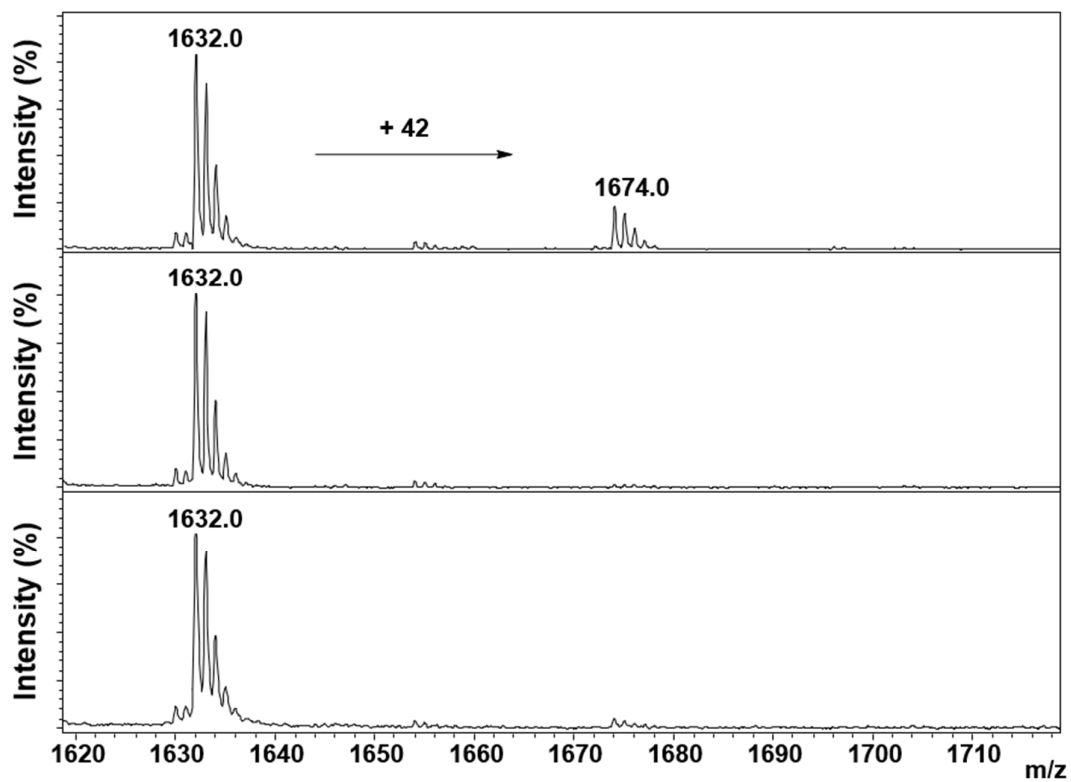

**Figure S47.** MALDI-TOF MS analysis of GCN5 (2  $\mu\text{M}$ )-catalyzed acetylation reaction of H3h2K9 peptide (100  $\mu\text{M}$ ) in the presence of AcCoA (300  $\mu\text{M}$ ) at 37  $^{\circ}\text{C}$ , after 3 h incubation (top panel). Control reactions after 3 h: absence of AcCoA (middle panel), absence of GCN5 (bottom panel).

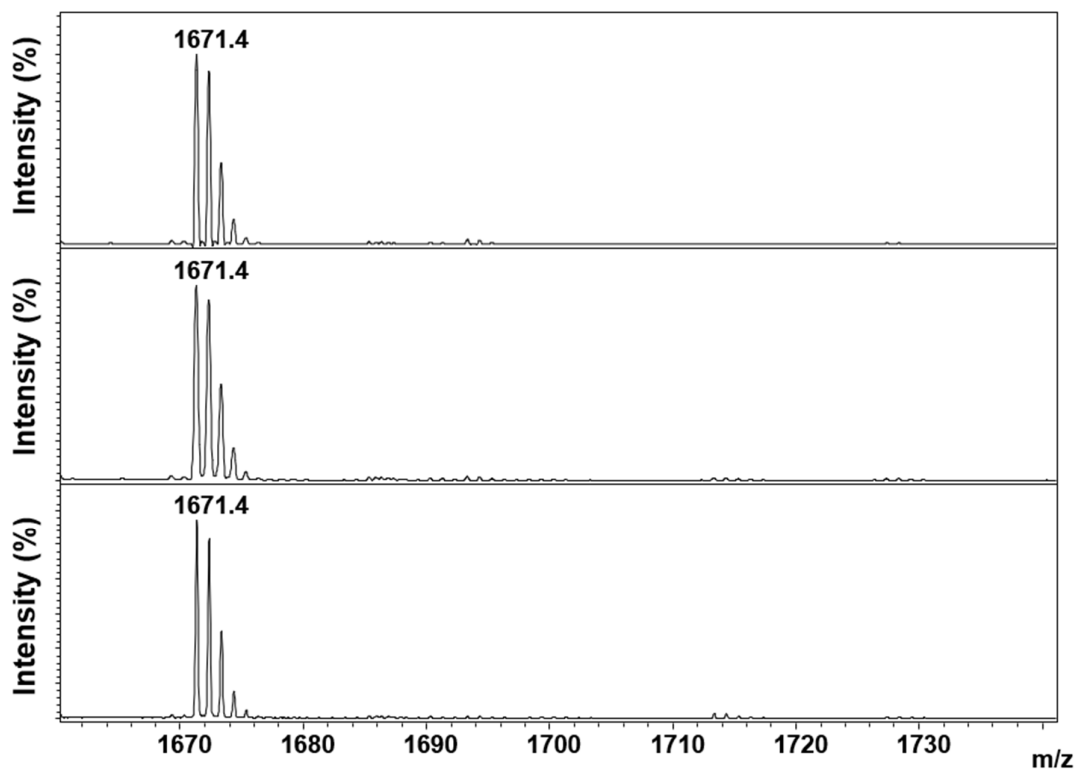

**Figure S48.** MALDI-TOF MS analysis of GCN5 (2  $\mu$ M)-catalyzed acetylation reaction of H3h<sub>3</sub>K14 peptide (100  $\mu$ M) in the presence of AcCoA (300  $\mu$ M) at 37 °C, after 3 h incubation (top panel). Control reactions after 3 h: absence of AcCoA (middle panel), absence of GCN5 (bottom panel).

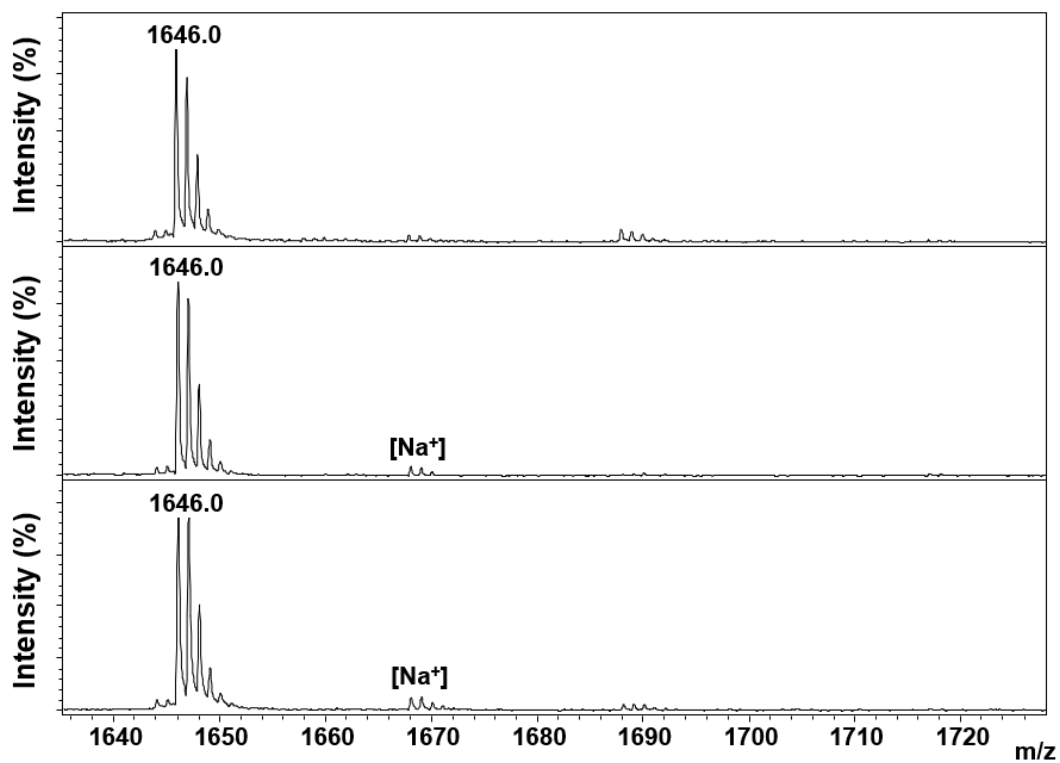

**Figure S49.** MALDI-TOF MS analysis of PCAF (2  $\mu$ M)-catalyzed acetylation reaction of H3h<sub>3</sub>K9 peptide (100  $\mu$ M) in the presence of AcCoA (300  $\mu$ M) at 37 °C, after 3 h incubation (top panel). Control reactions after 3 h: absence of AcCoA (middle panel), absence of PCAF (bottom panel).

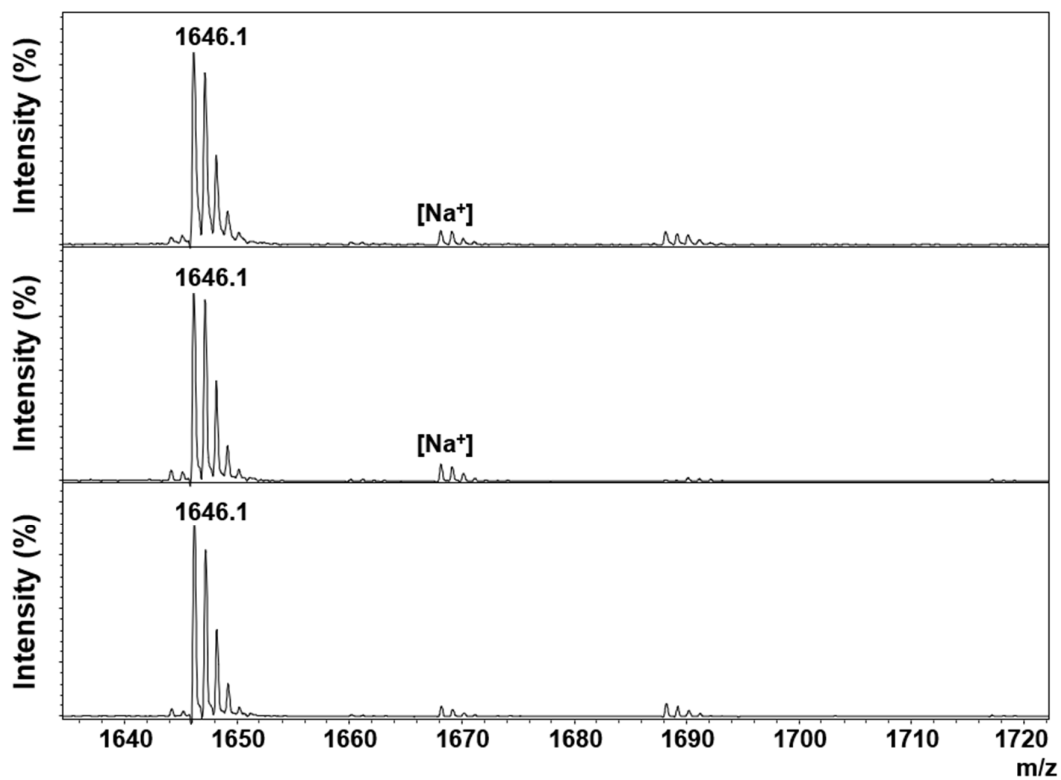

**Figure S50.** MALDI-TOF MS analysis of GCN5 (2  $\mu\text{M}$ )-catalyzed acetylation reaction of H3h3K9 peptide (100  $\mu\text{M}$ ) in the presence of AcCoA (300  $\mu\text{M}$ ) at 37  $^{\circ}\text{C}$ , after 3 h incubation (top panel). Control reactions after 3 h: absence of AcCoA (middle panel), absence of GCN5 (bottom panel).



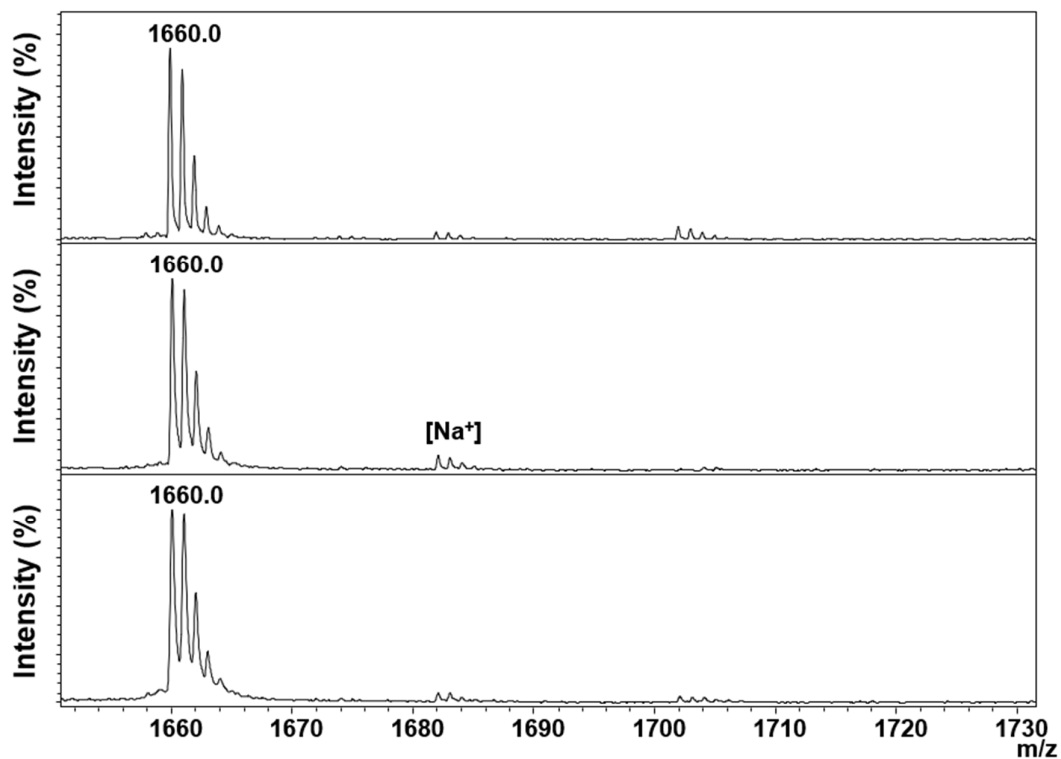

**Figure S51.** MALDI-TOF MS analysis of PCAF (2  $\mu\text{M}$ )-catalyzed acetylation reaction of H3h4K9 peptide (100  $\mu\text{M}$ ) in the presence of AcCoA (300  $\mu\text{M}$ ) at 37  $^{\circ}\text{C}$ , after 3 h incubation (top panel). Control reactions after 3 h: absence of AcCoA (middle panel), absence of PCAF (bottom panel).

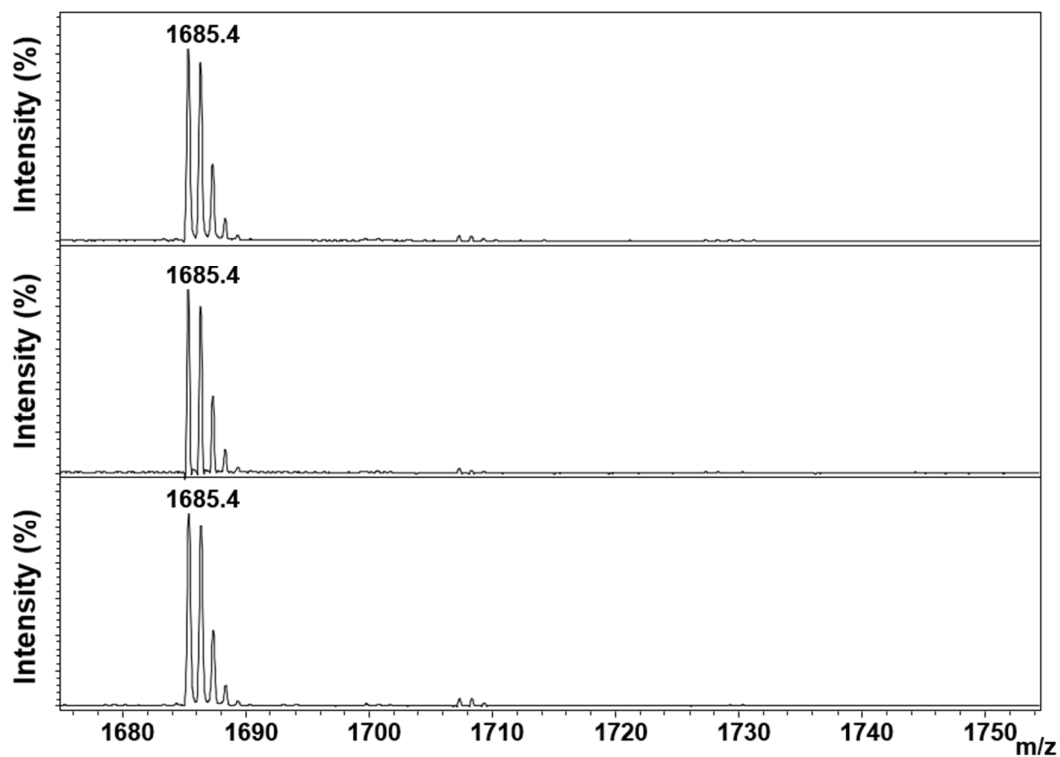

**Figure S52.** MALDI-TOF MS analysis of GCN5 (2  $\mu\text{M}$ )-catalyzed acetylation reaction of H3h4K14 peptide (100  $\mu\text{M}$ ) in the presence of AcCoA (300  $\mu\text{M}$ ) at 37  $^{\circ}\text{C}$ , after 3 h incubation (top panel). Control reactions after 3 h: absence of AcCoA (middle panel), absence of GCN5 (bottom panel).

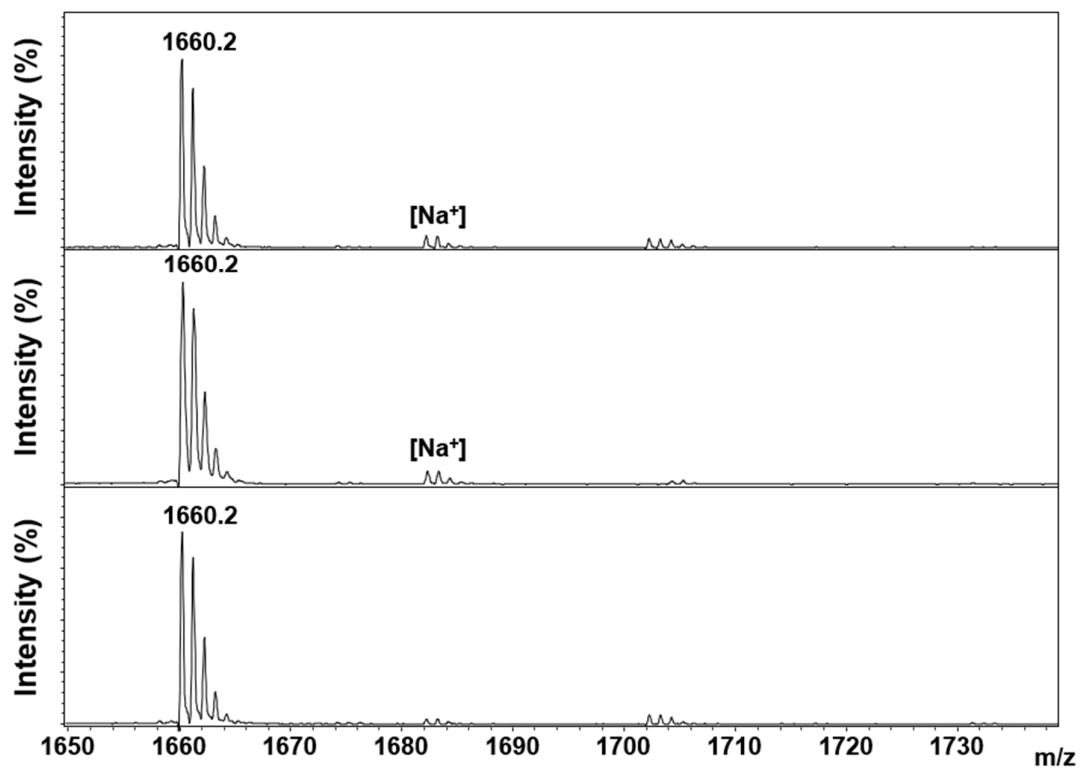

**Figure S53.** MALDI-TOF MS analysis of GCN5 (2  $\mu$ M)-catalyzed acetylation reaction of H3h4K9 peptide (100  $\mu$ M) in the presence of AcCoA (300  $\mu$ M) at 37  $^{\circ}$ C, after 3 h incubation (top panel). Control reactions after 3 h: absence of AcCoA (middle panel), absence of GCN5 (bottom panel).

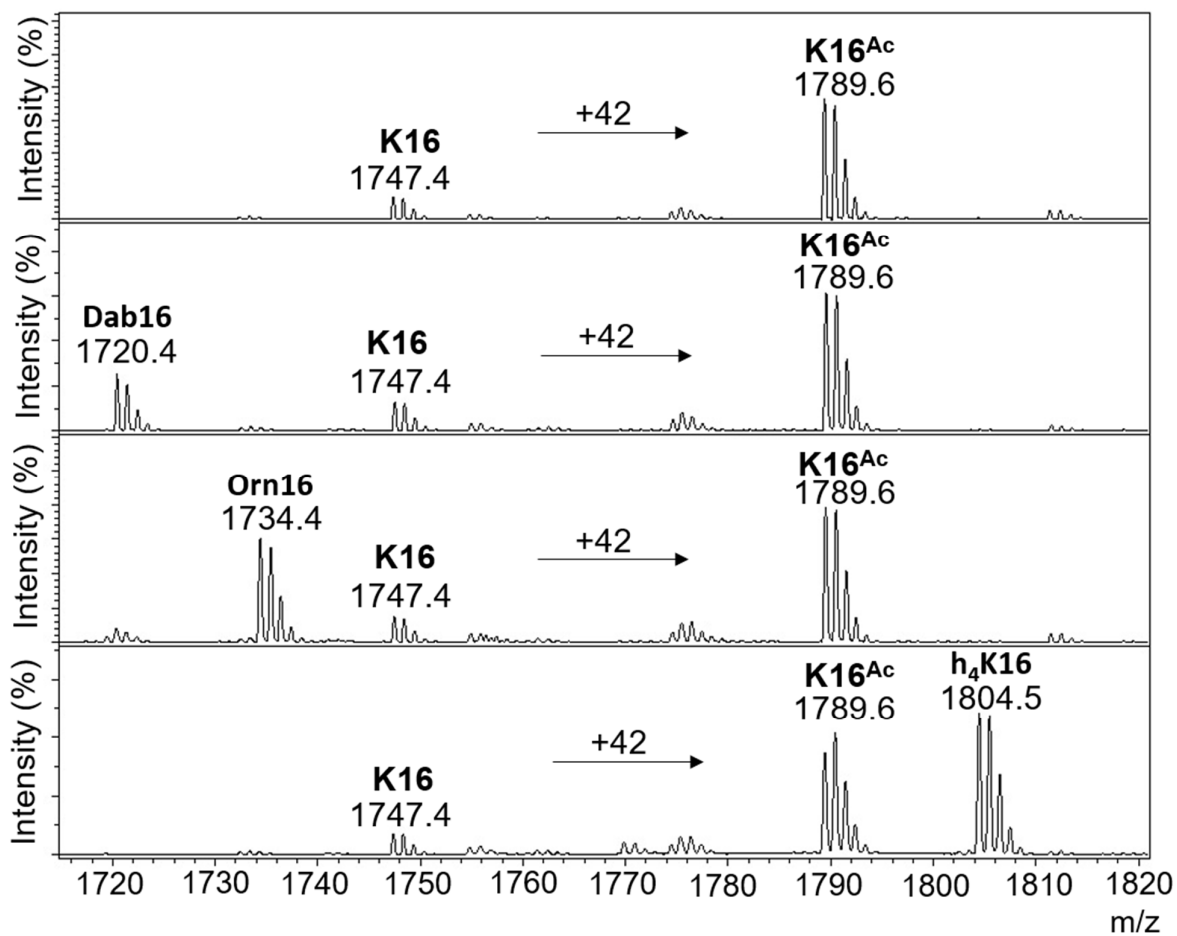

**Figure S54.** MALDI-TOF analysis of the competition experiment showing the MOF (0.2  $\mu$ M)-catalyzed acetylation of H4K16 (100  $\mu$ M) in presence, or not, of equimolar amount of H4X16 peptides (100  $\mu$ M). Reactions were carried out at 37  $^{\circ}$ C and quenched after 1 h. From the top to the bottom: Control reaction; H4K16 + H4Dab16; H4K16 + H4Orn16; H4K16 + H4h<sub>4</sub>K16.

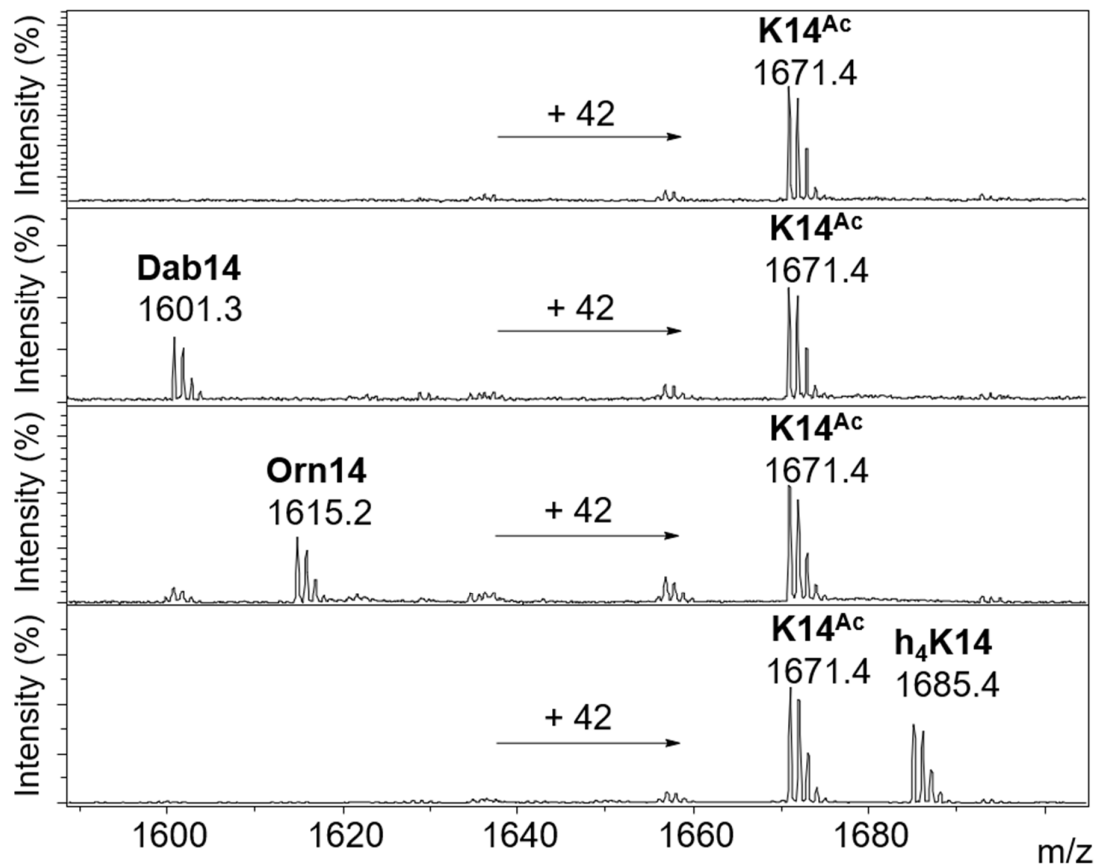

**Figure S55.** MALDI-TOF analysis of the competition experiment showing the PCAF (0.5  $\mu\text{M}$ )-catalyzed acetylation of H3K14 (100  $\mu\text{M}$ ) in presence, or not, of equimolar amount of H3X14 peptides (100  $\mu\text{M}$ ). Reactions were carried out at 37  $^{\circ}\text{C}$  and quenched after 1 h. From the top to the bottom: Control reaction; H3K14 + H3Dab14; H3K14 + H3Orn14; H3K14 + H3h<sub>4</sub>K14.

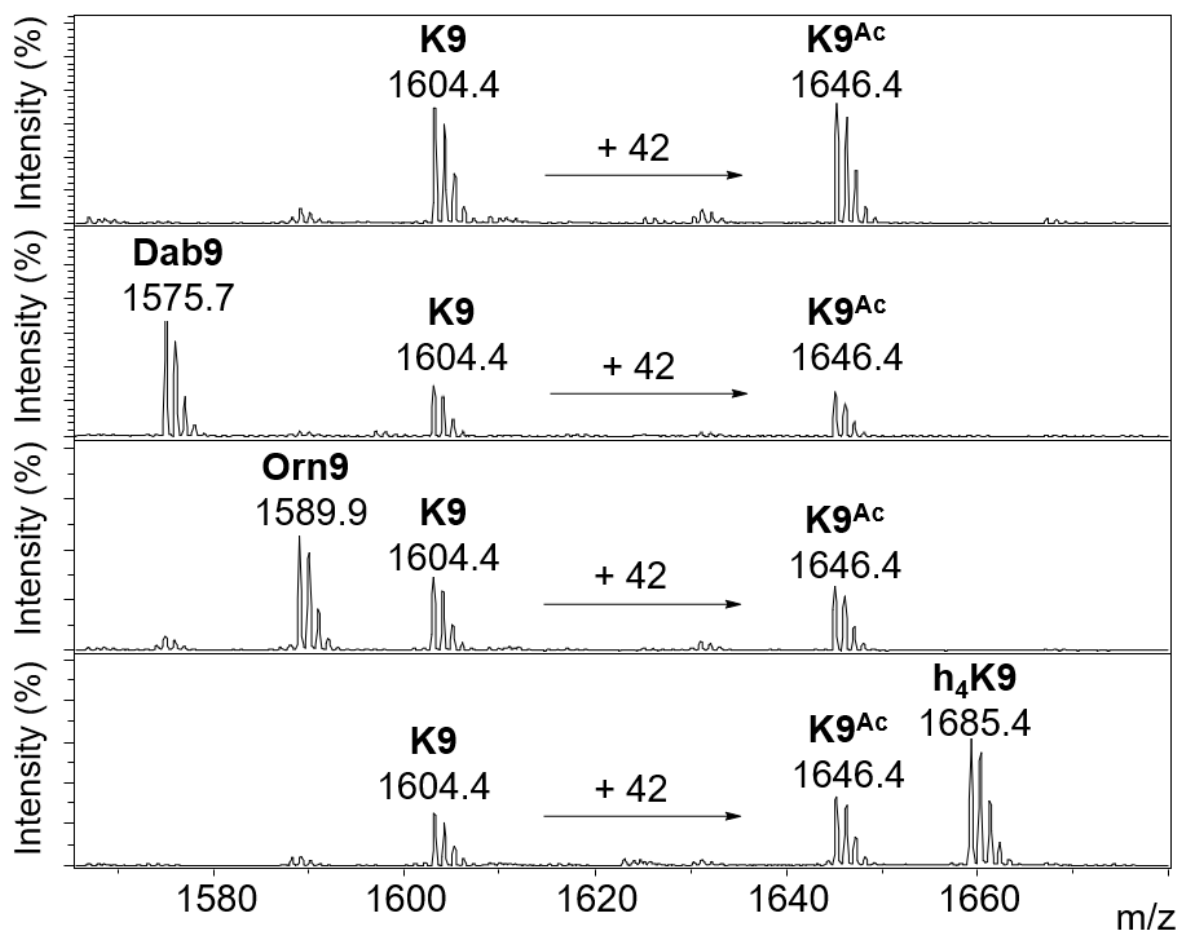

**Figure S56.** MALDI-TOF analysis of the competition experiment showing the PCAF (0.5  $\mu$ M)-catalyzed acetylation of H3K9 (100  $\mu$ M) in presence, or not, of equimolar amount of H3X9 peptides (100  $\mu$ M). Reactions were carried out at 37  $^{\circ}$ C and quenched after 1 h. From the top to the bottom: Control reaction; H3K9 + H3Dab9; H3K9 + H3Orn9; H3K9 + H3h<sub>4</sub>K9.

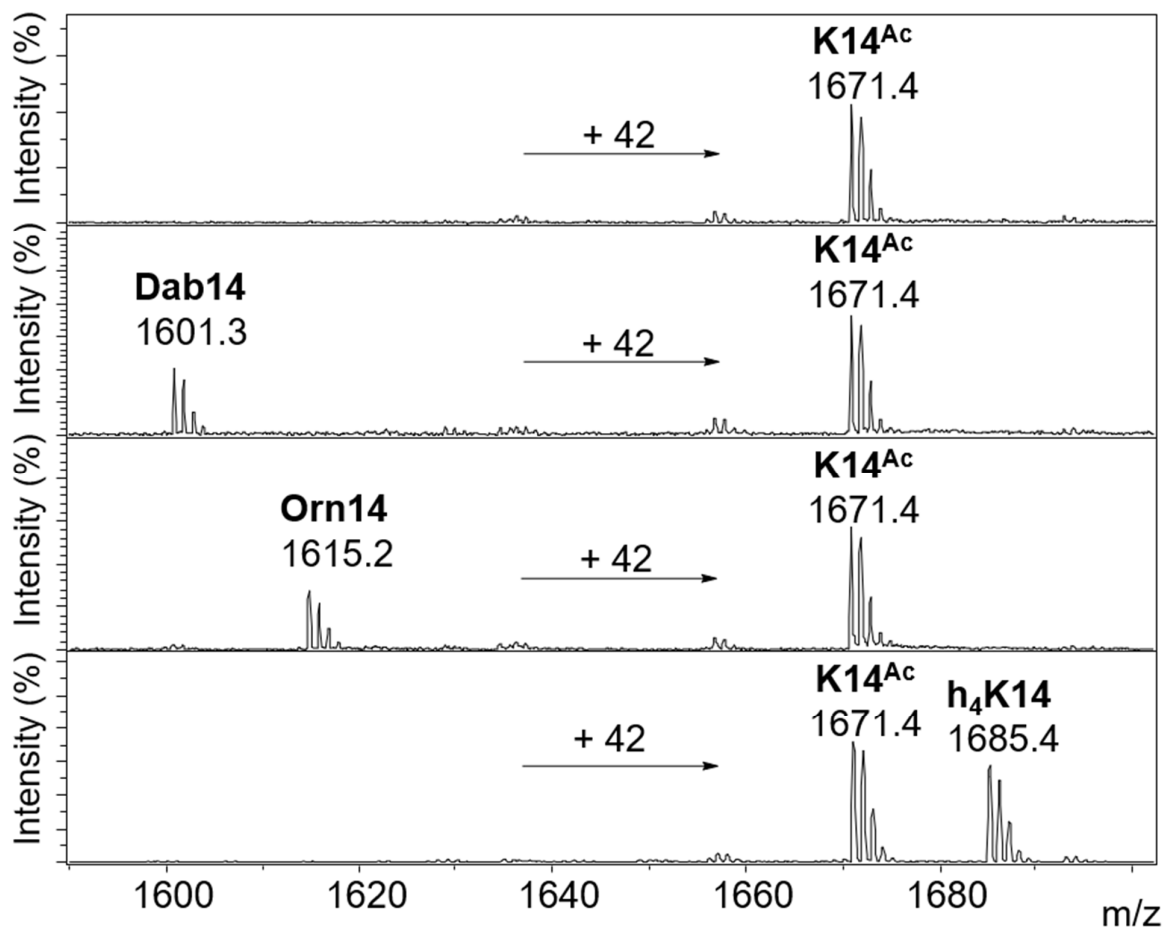

**Figure S57.** MALDI-TOF analysis of the competition experiment showing the GCN5 (0.5  $\mu$ M)-catalyzed acetylation of H3K14 (100  $\mu$ M) in presence, or not, of equimolar amount of H3X14 peptides (100  $\mu$ M). Reactions were carried out at 37  $^{\circ}$ C and quenched after 1 h. From the top to the bottom: Control reaction; H3K14 + H3Dab14; H3K14 + H3Orn14; H3K14 + H3h<sub>4</sub>K14.

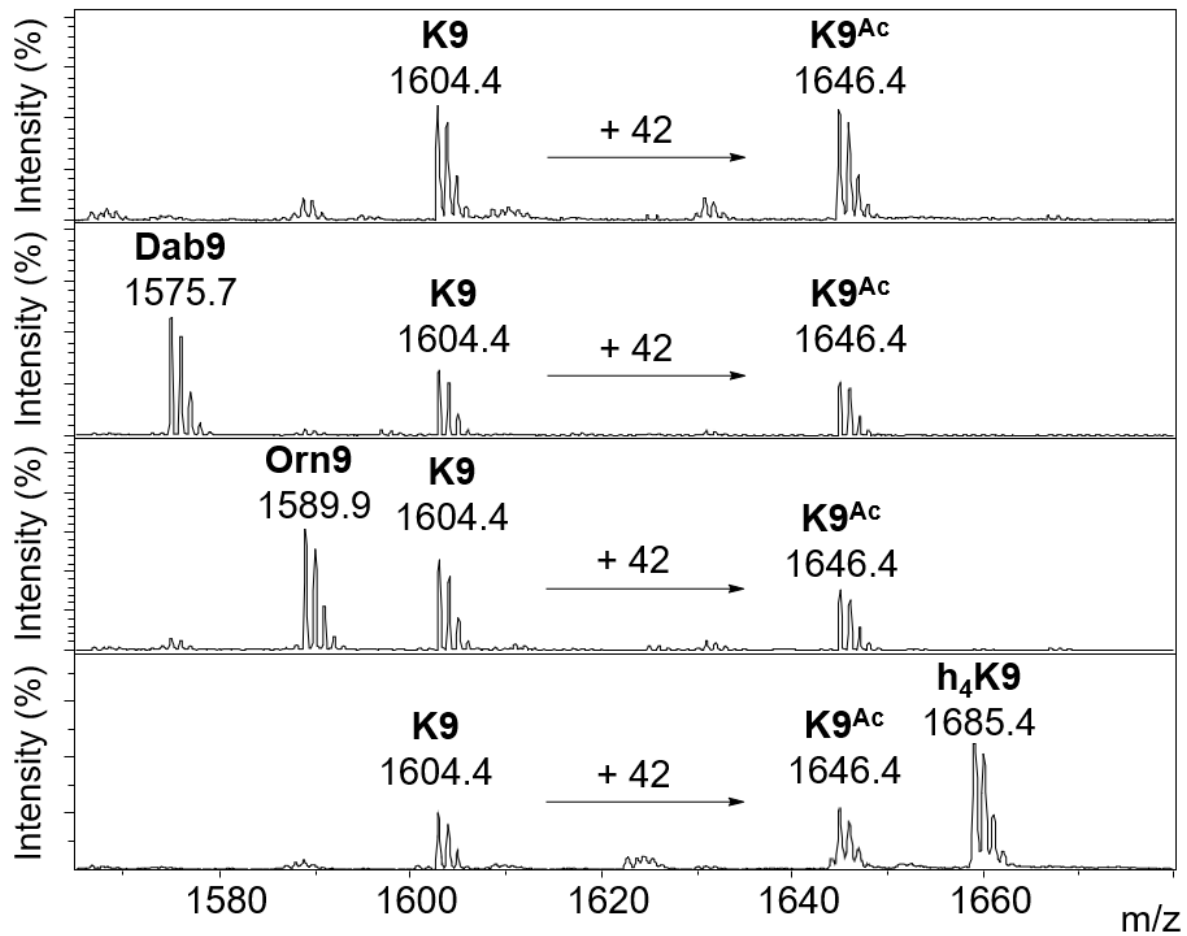

**Figure S58.** MALDI-TOF analysis of the competition experiment showing the GCN5 (0.5  $\mu$ M)-catalyzed acetylation of H3K9 (100  $\mu$ M) in presence, or not, of equimolar amount of H3X9 peptides (100  $\mu$ M). Reactions were carried out at 37  $^{\circ}$ C and quenched after 1 h. From the top to the bottom: Control reaction; H3K9 + H3Dab9; H3K9 + H3Orn9; H3K9 + H3h<sub>4</sub>K9.



## 8. Kinetics plots

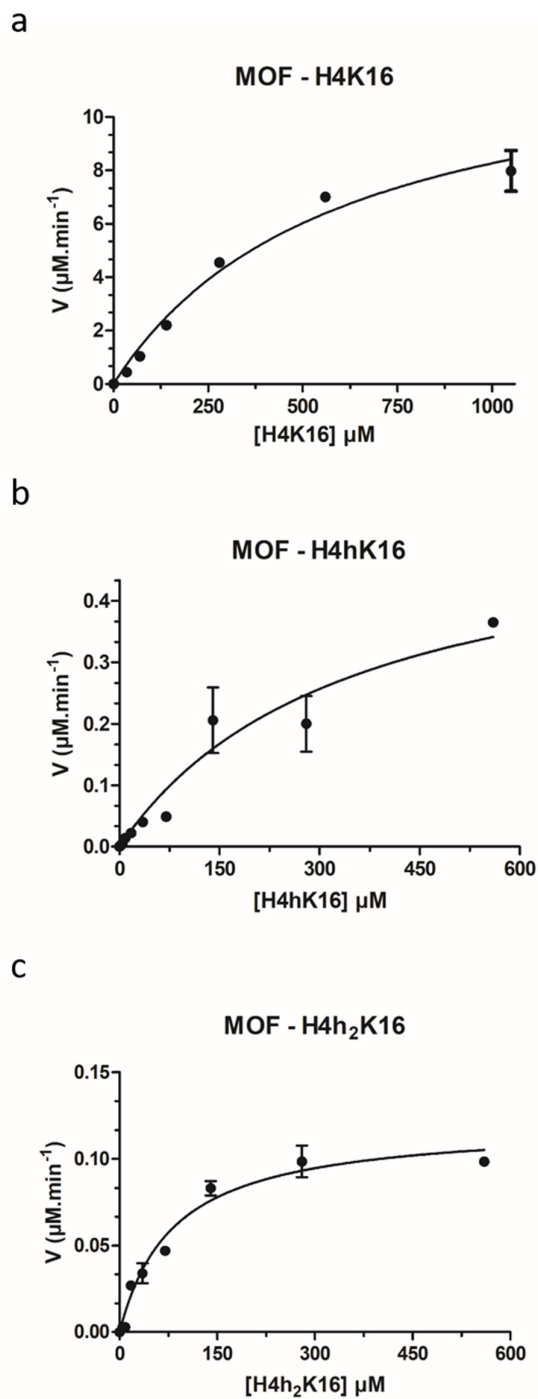

**Figure S59.** Michaelis-Menten plots of MOF-catalyzed acetylation of (a) H4K16; (b) H4hK16; (c) H4h<sub>2</sub>K16. Experiments were carried out in replicates and data are reported as value  $\pm$  SD.

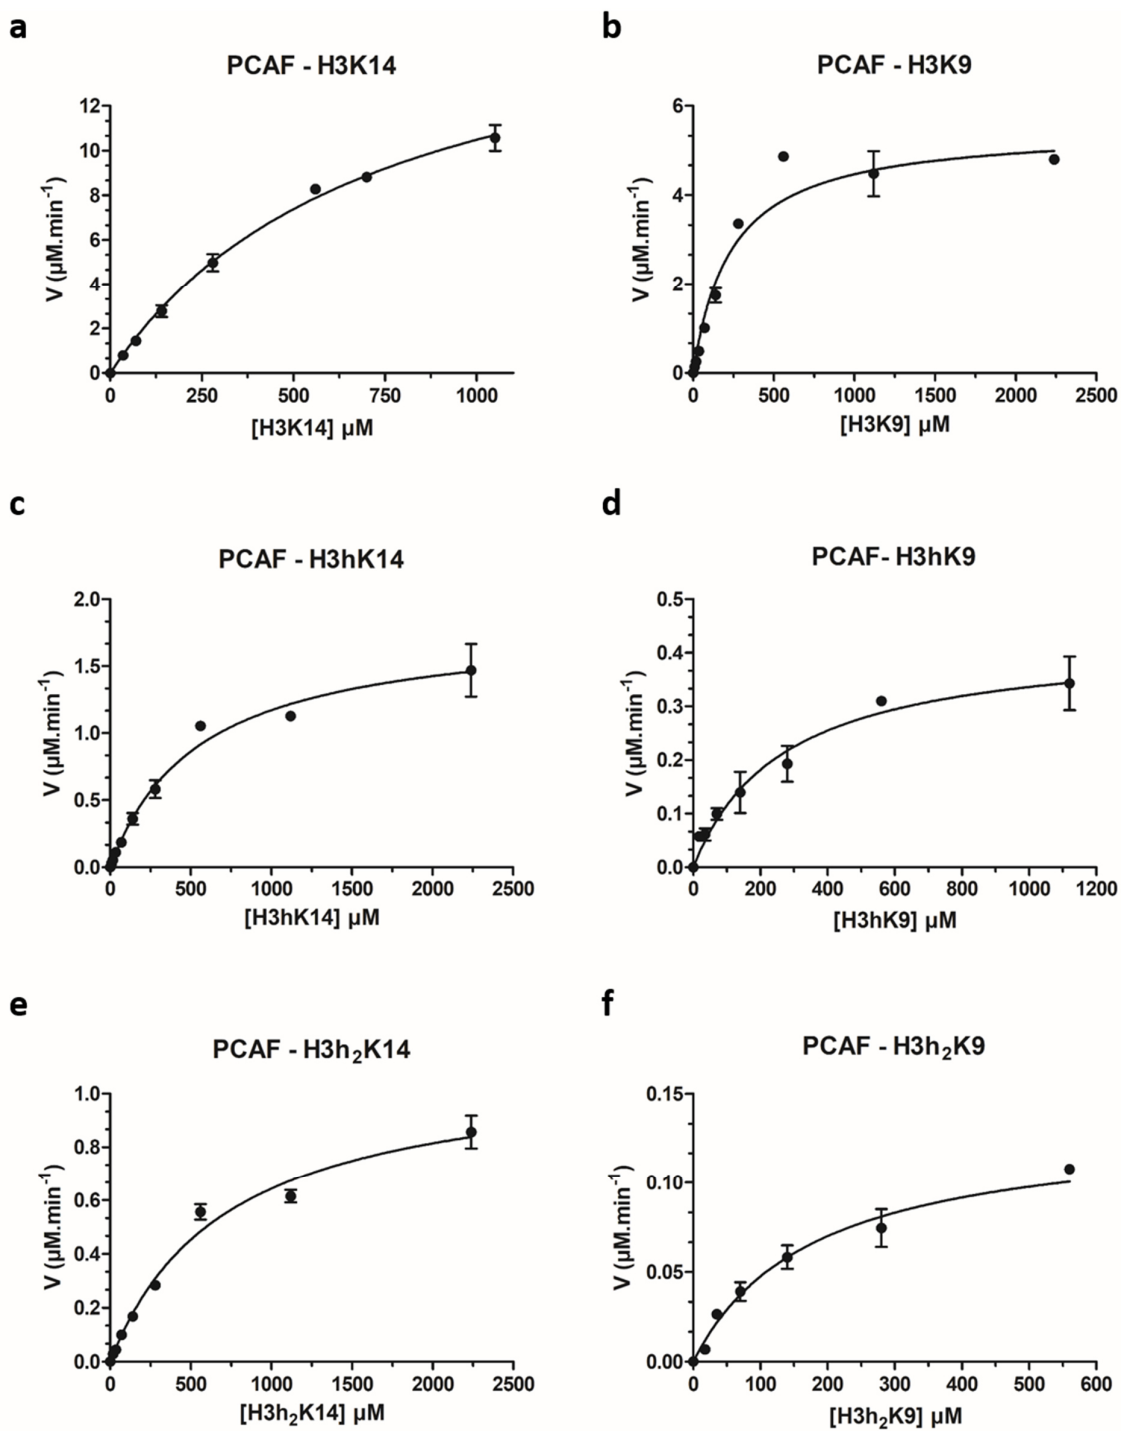

**Figure S60.** Michaelis-Menten plots of PCAF-catalyzed acetylation of (a) H4K14; (b) H3K9; (c) H3hK14; (d) H3hK9; (e) H3h<sub>2</sub>K14; (f) H3h<sub>2</sub>K9. Experiments were carried out in replicates and data are reported as value  $\pm$  SD.

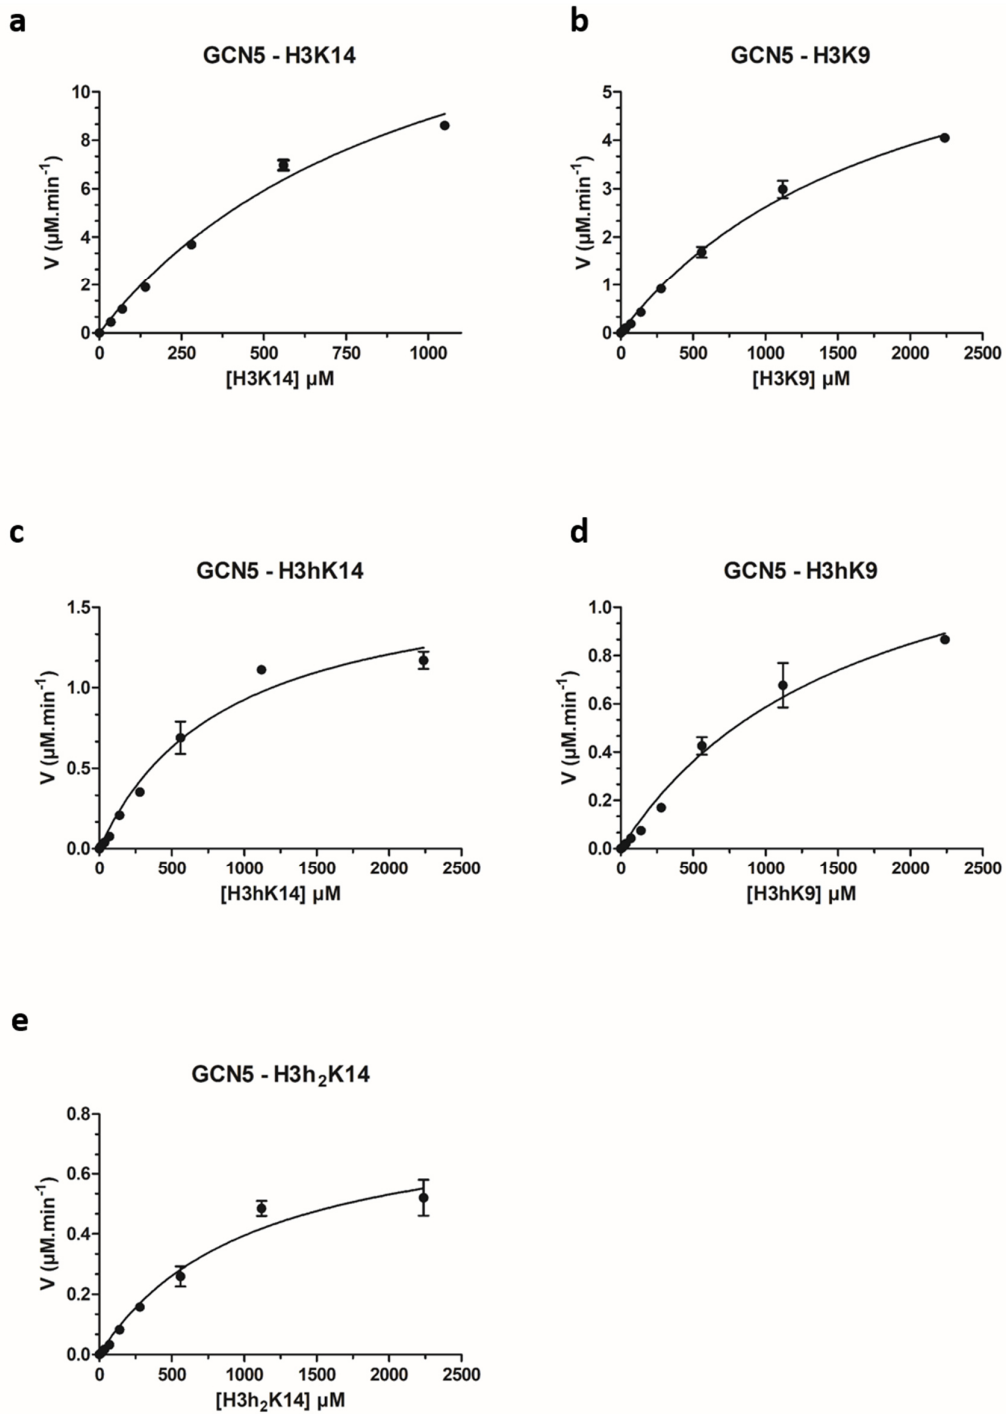

**Figure S61.** Michaelis-Menten plots of GCN5-catalyzed acetylation of (a) H4K14; (b) H3K9; (c) H3hK14; (d) H3hK9; (e) H3h<sub>2</sub>K14. Experiments were carried out in replicates and data are reported as value  $\pm$  SD.

## 9. NMR spectra

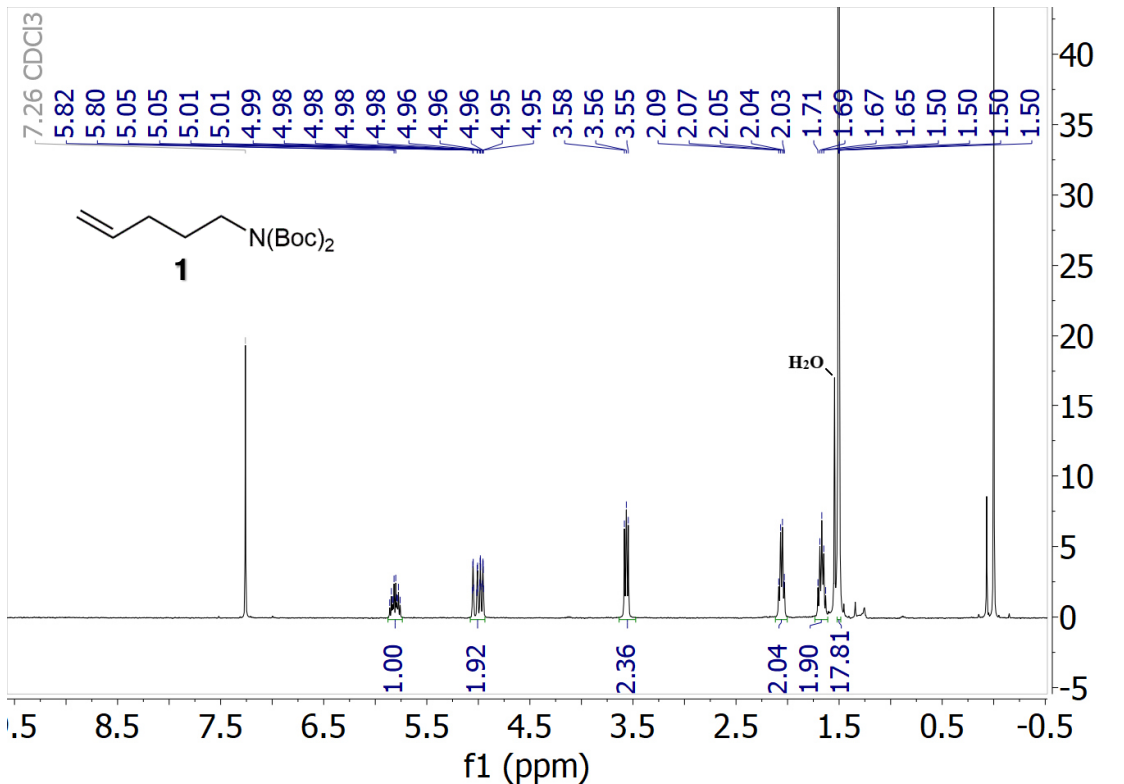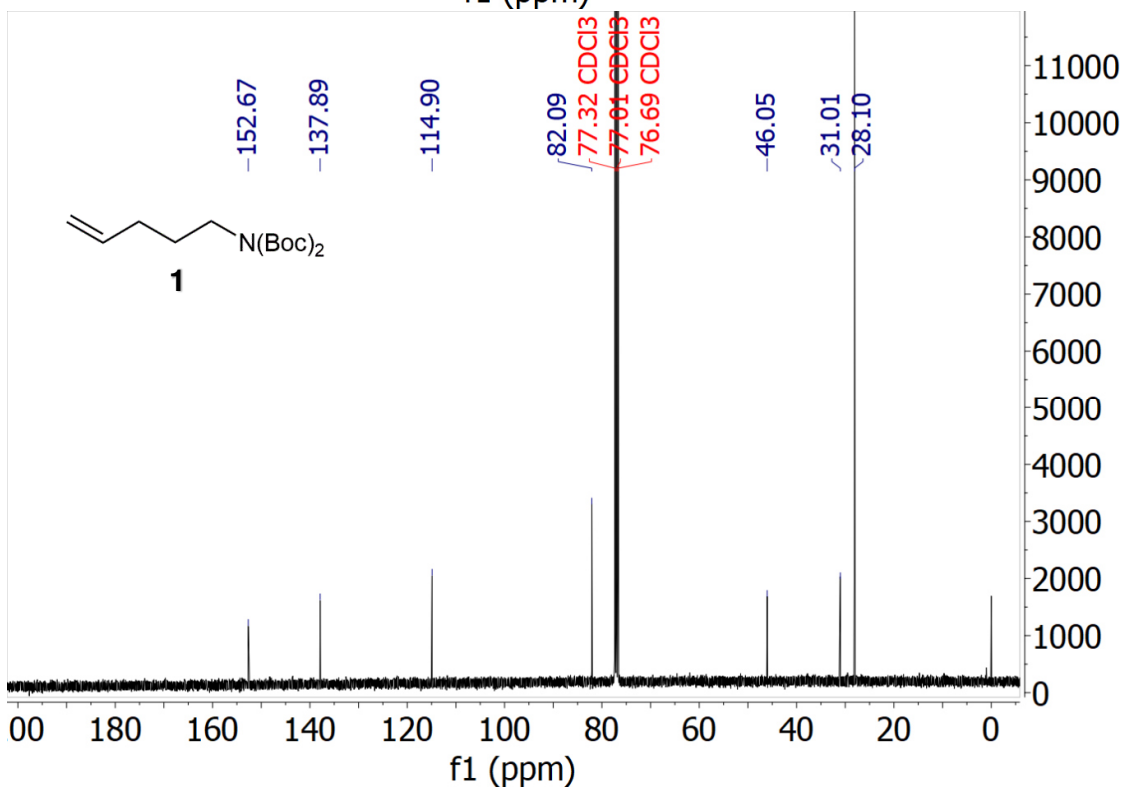

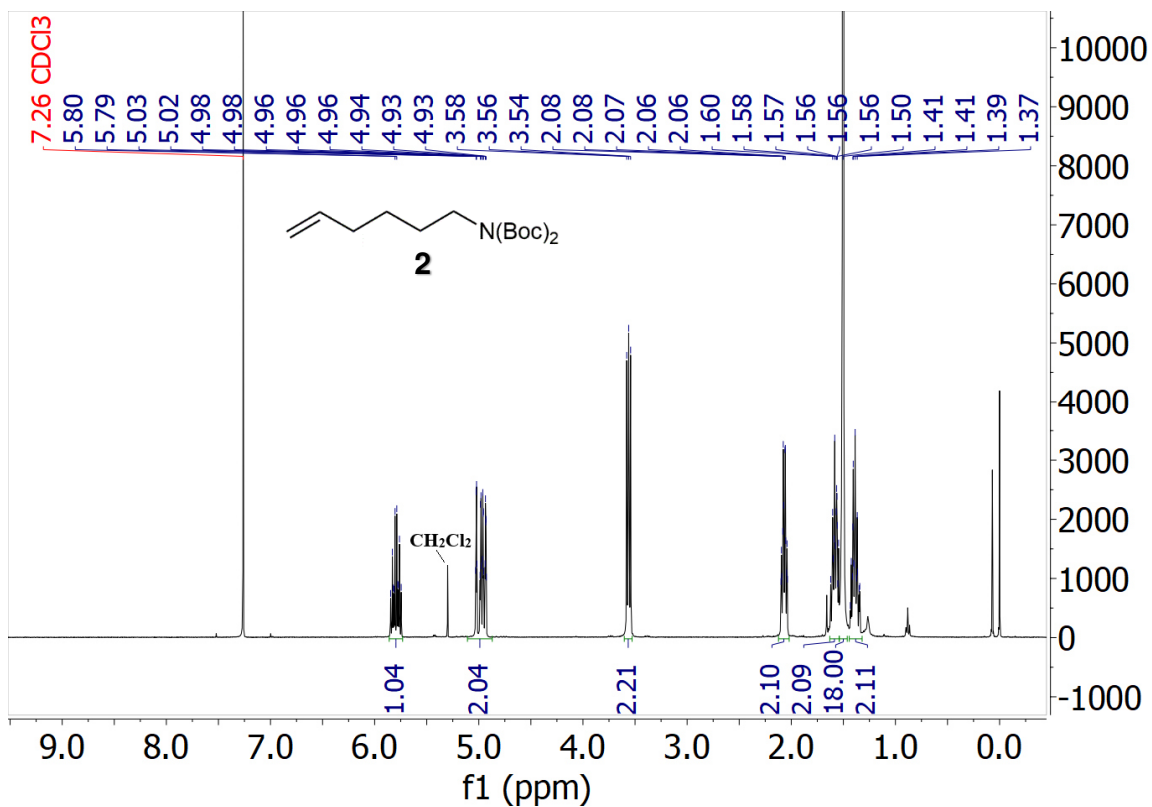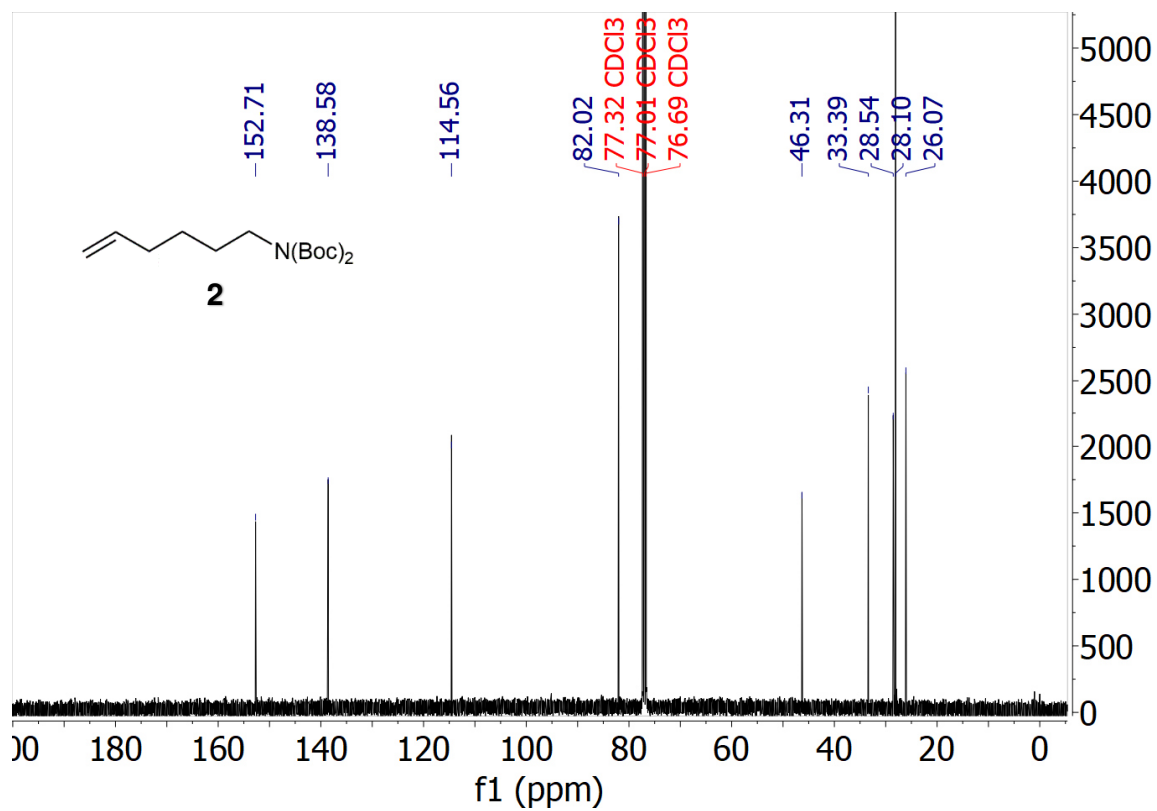

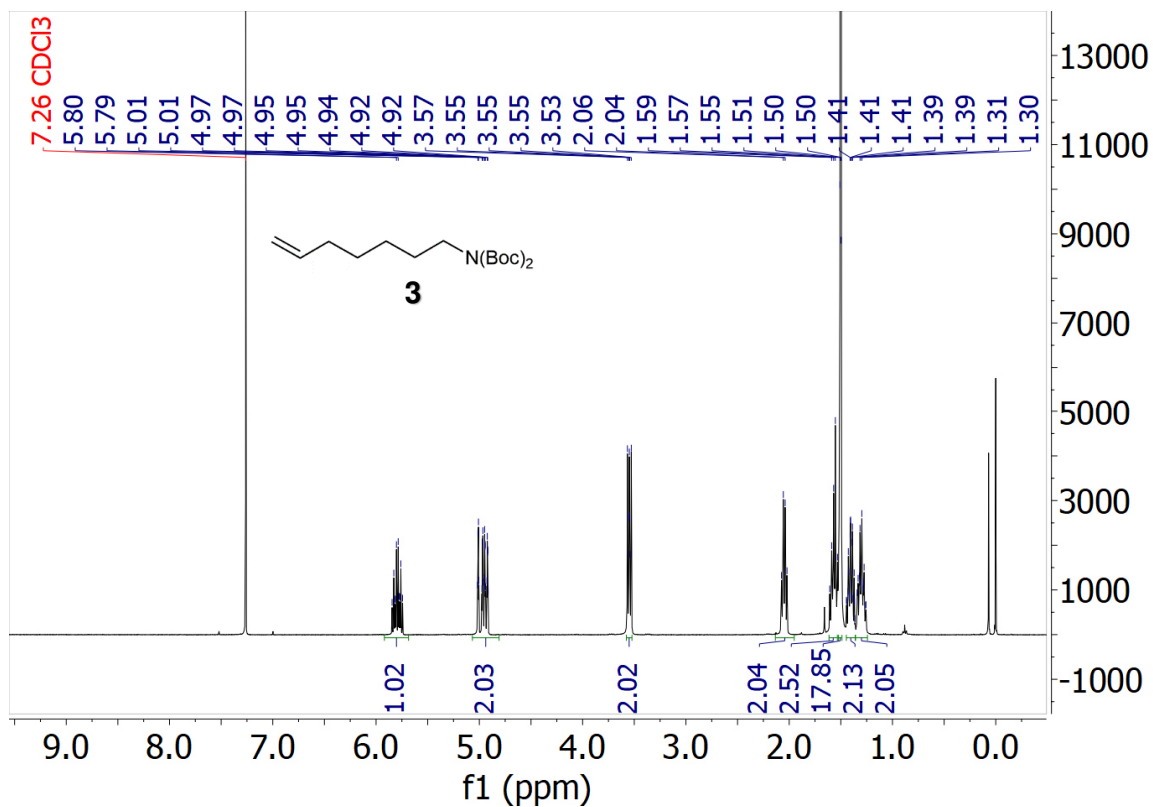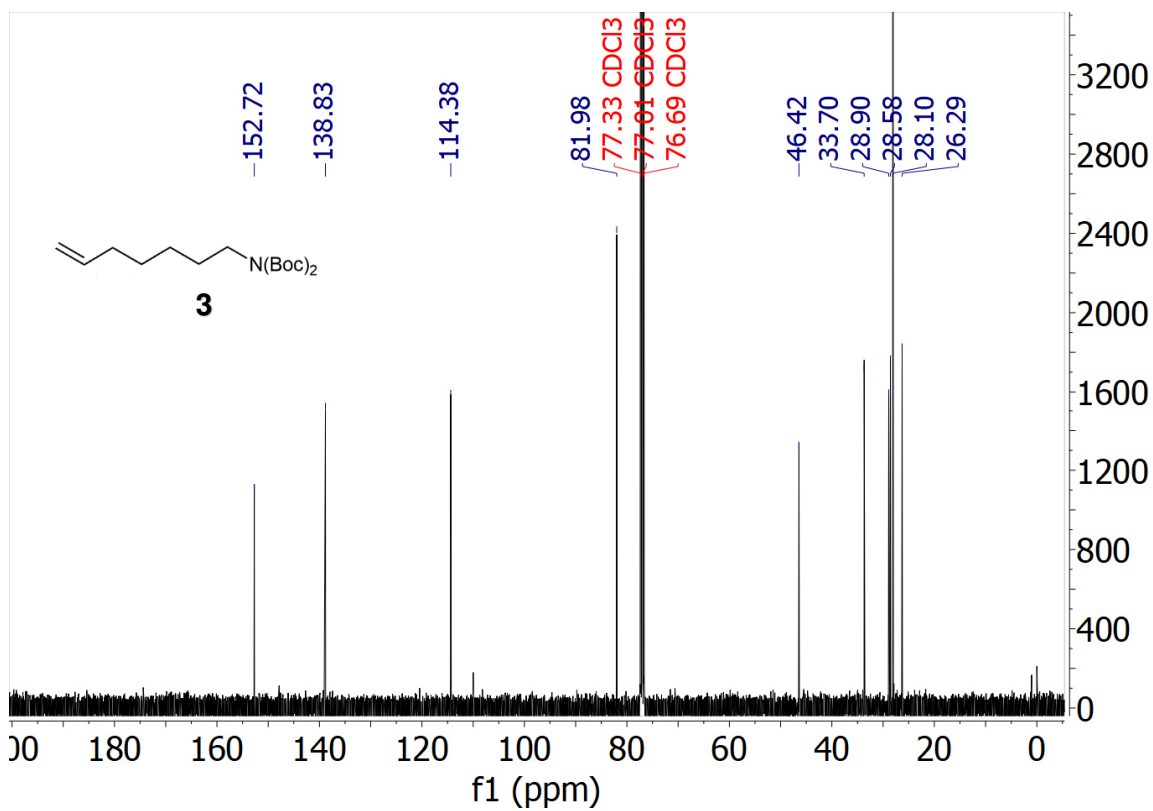



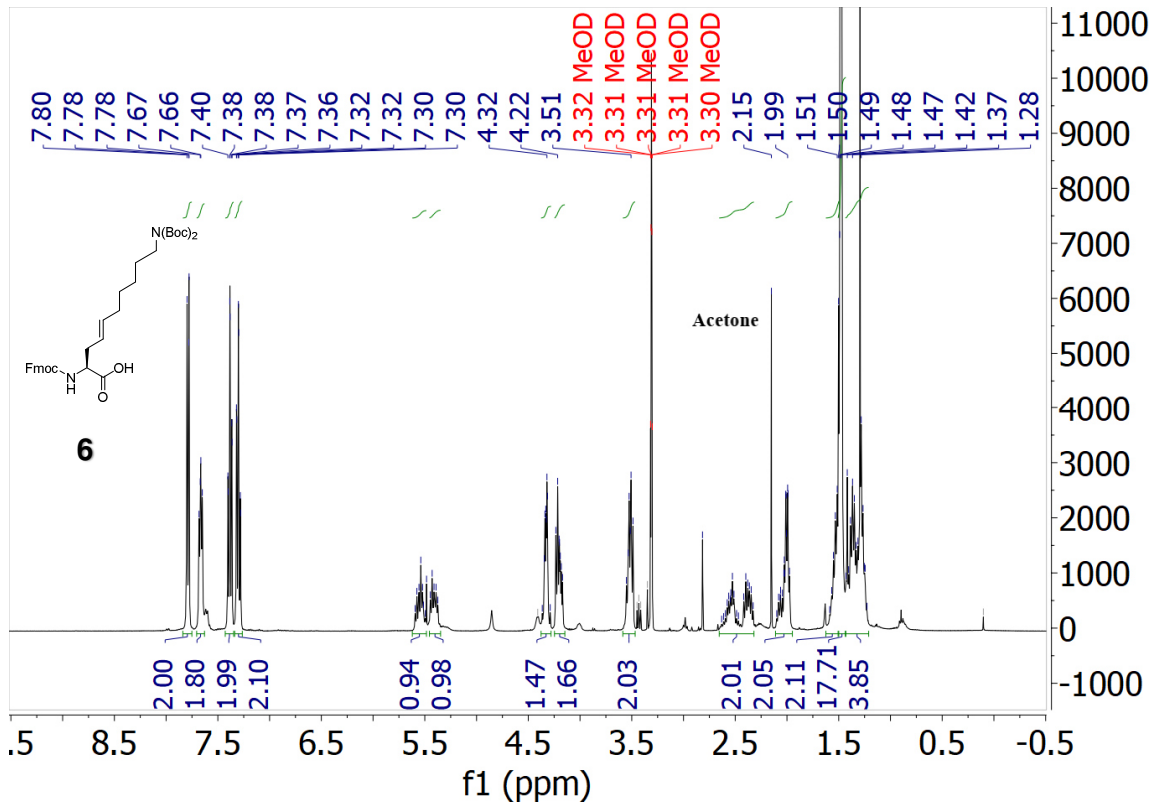



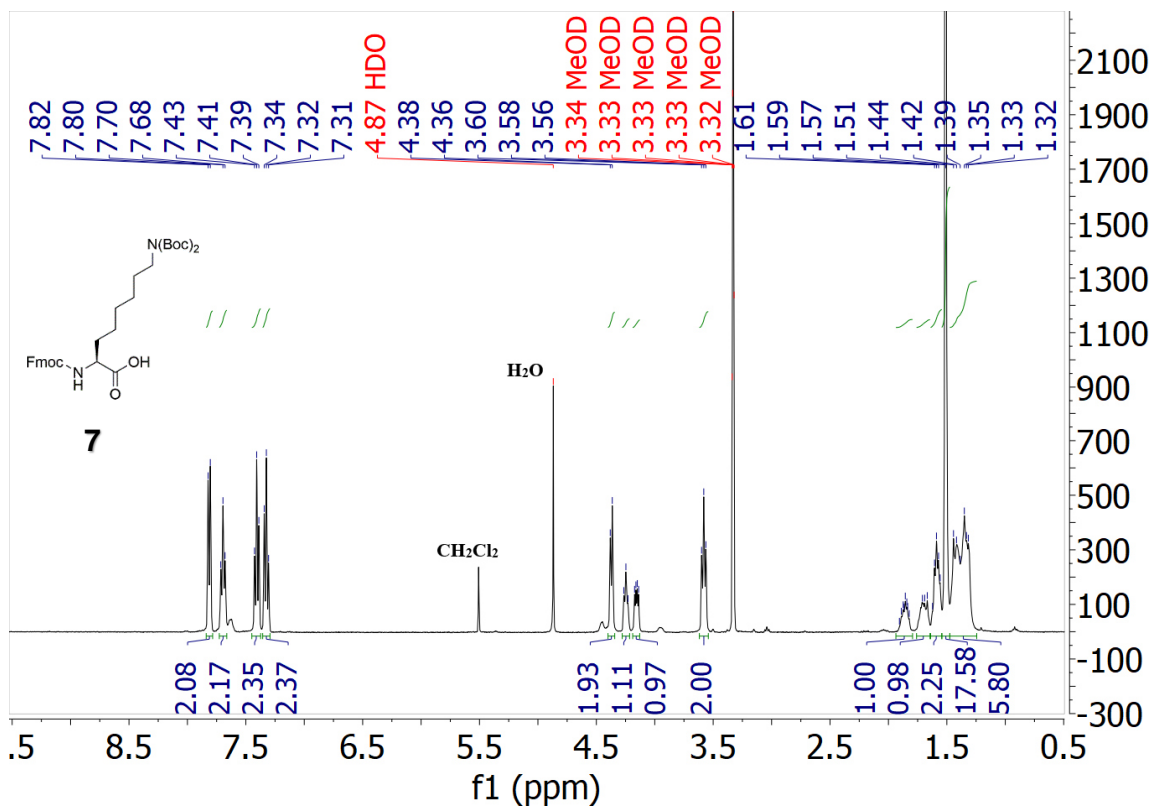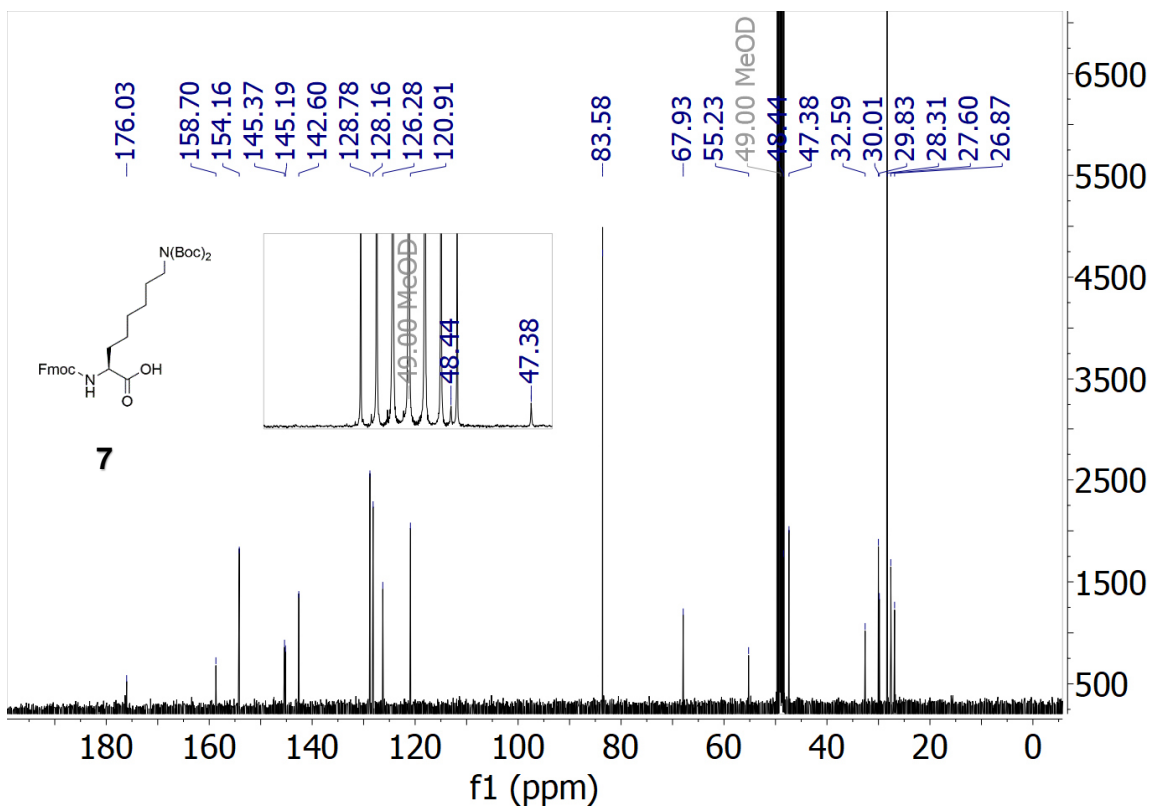

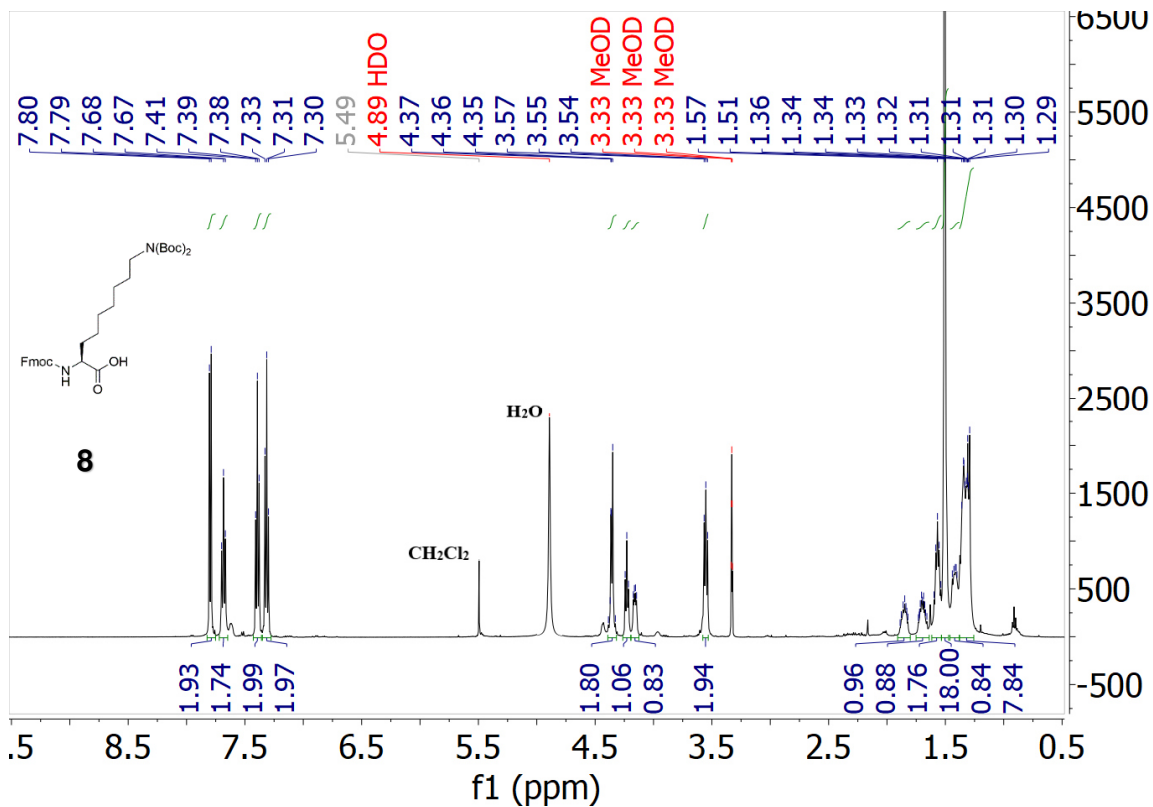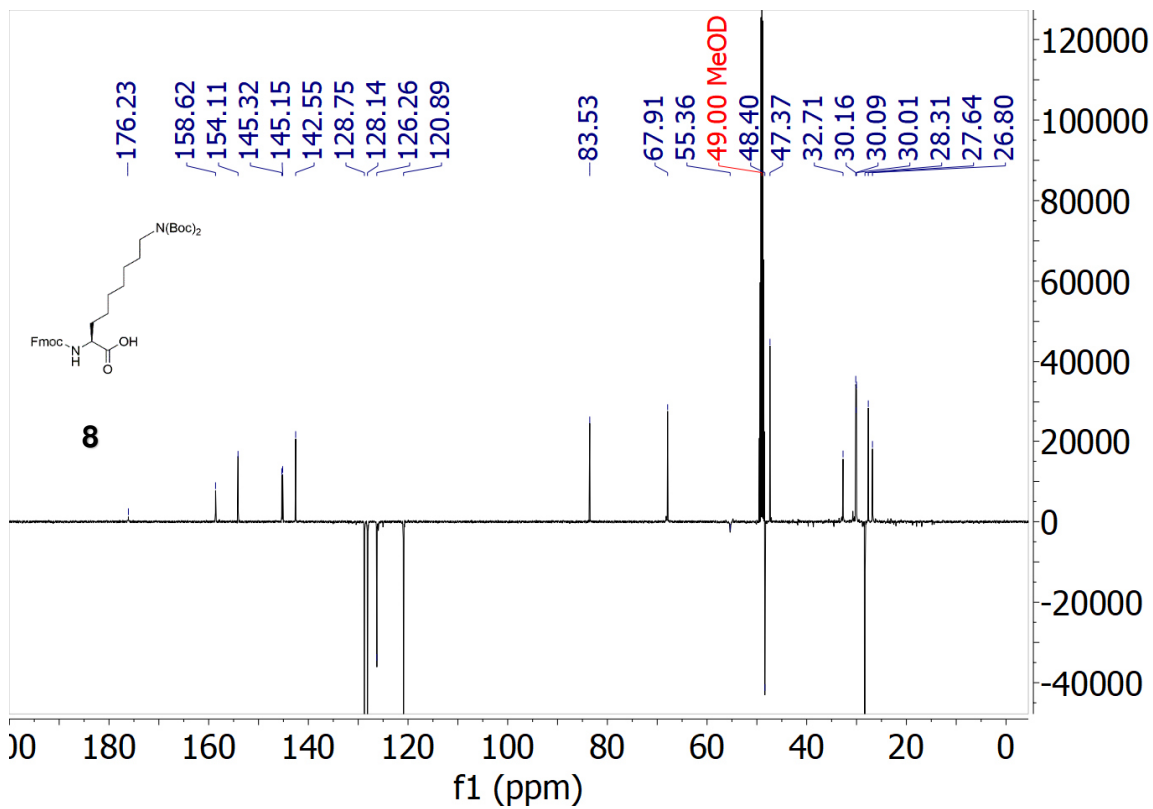

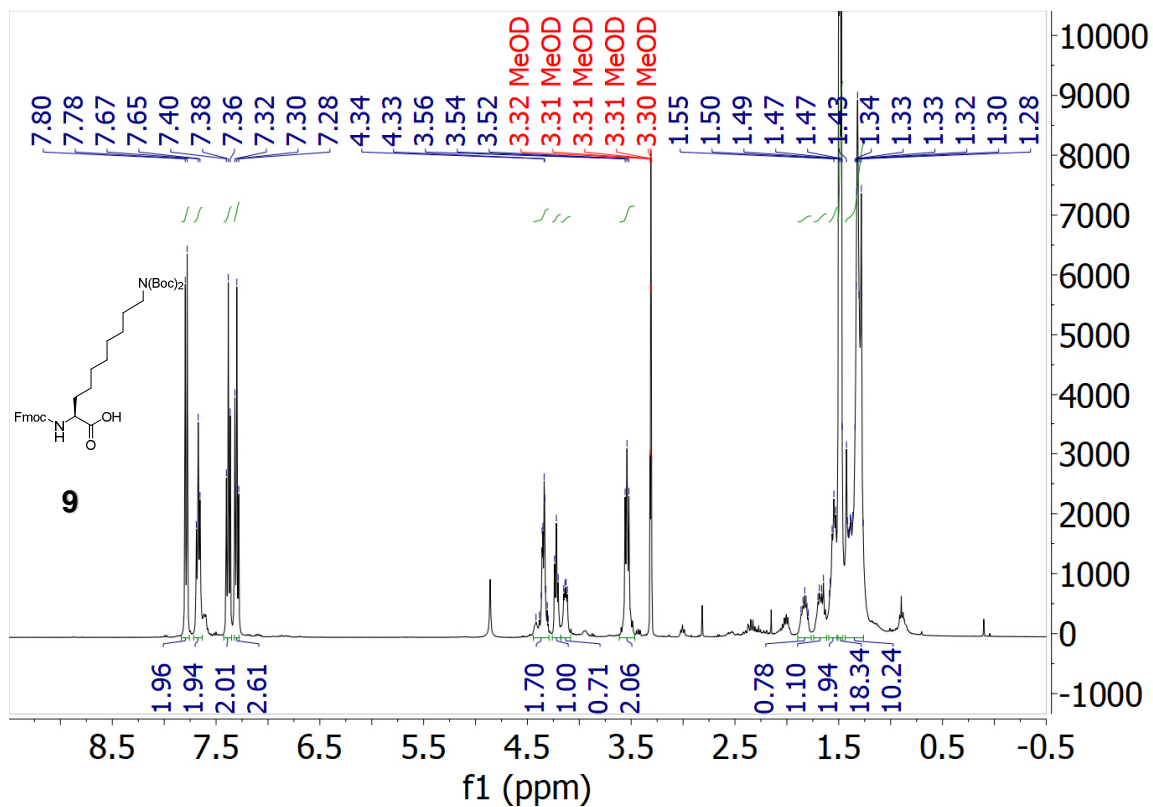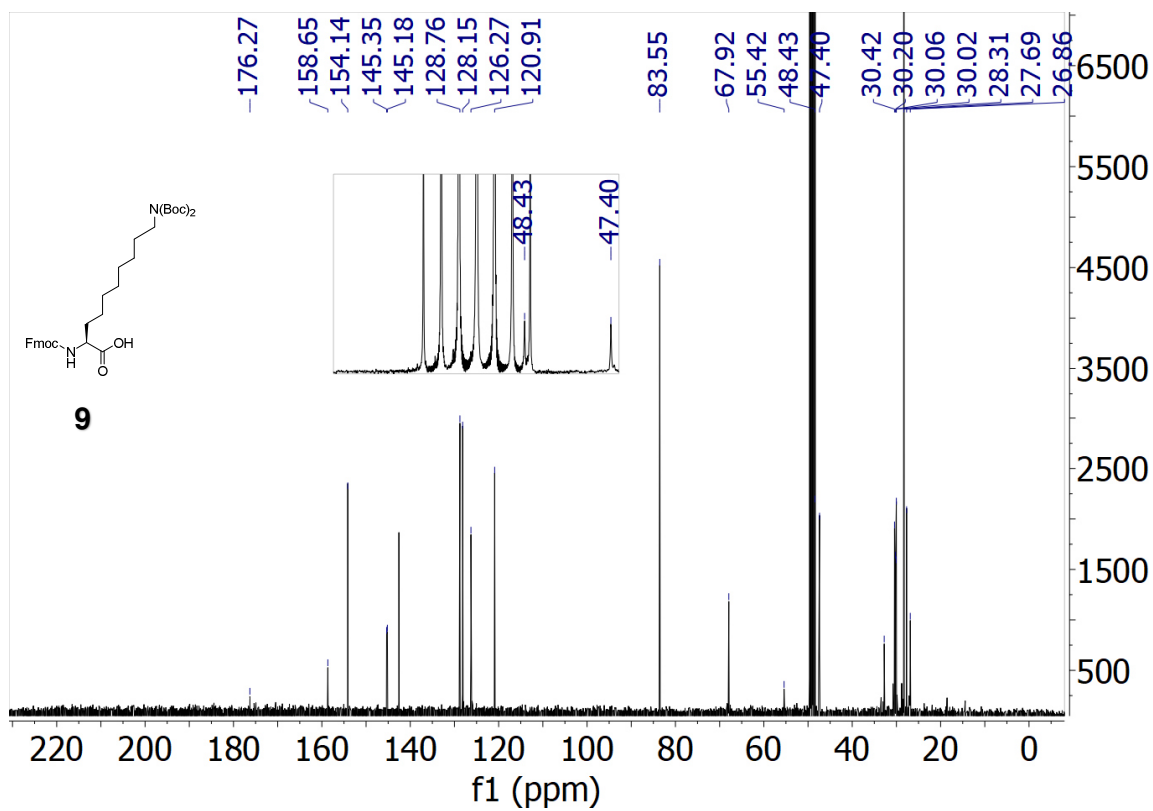

## 10. References

1. Cox, N., Dang, H., Whittaker, A. M. & Lalic, G. NHC-copper hydrides as chemoselective reducing agents: Catalytic reduction of alkynes, alkyl triflates, and alkyl halides. *Tetrahedron* (2014).
2. Smith, M. E. B. *et al.* Development of chemical probes: Toward the mode of action of a methylene-linked di(aryl acetate) E1. *Bioorg. Med. Chem.* (2010).
